# Supplementary material
Source: PubMed Central journal article supplement (PMC9256812)
Supplement: NIHMS1808157-supplement-supinfo.pdf [file NIHMS1808157-supplement-supinfo.pdf]

## Supporting Information

# ***carba*-Nucleopeptides (cNPs): A Novel Biopharmaceutical Modality Through Aqueous Rhodamine B Photoredox Catalysis**

Jacob R. Immel and Steven Bloom\*

### Table of Contents

|                                                                                     |           |
|-------------------------------------------------------------------------------------|-----------|
| <b>General Information .....</b>                                                    | <b>2</b>  |
| <b>Reaction Optimization .....</b>                                                  | <b>3</b>  |
| Effect of photocatalyst identity on the reaction .....                              | 3         |
| Effect of catalyst loading on the reaction.....                                     | 4         |
| Effect of amine identity on the reaction.....                                       | 5         |
| Effect of cosolvent identity and ratio on the reaction .....                        | 6         |
| Effect of scaling the reaction .....                                                | 7         |
| Effect of using NH <sub>2</sub> -Gly-Pro-Dha-Phe-CO <sub>2</sub> H as peptide ..... | 8         |
| <b>Experimental Procedures.....</b>                                                 | <b>10</b> |
| Picture of reaction setups .....                                                    | 10        |
| General procedure for the synthesis of pyrimidine sidechains.....                   | 10        |
| General procedure for the synthesis of purine sidechains .....                      | 10        |
| Synthesis of cysteine-containing peptides .....                                     | 12        |
| Synthesis of Dha-containing peptides .....                                          | 15        |
| Synthesis of small molecules .....                                                  | 18        |
| <b>Parallel Synthesis .....</b>                                                     | <b>20</b> |
| Procedure for parallel synthesis .....                                              | 20        |
| Results from parallel synthesis .....                                               | 21        |
| <b>Flow Synthesis .....</b>                                                         | <b>32</b> |
| Procedure for flow synthesis and results .....                                      | 32        |
| <b>Mechanistic Studies.....</b>                                                     | <b>34</b> |
| TEMPO radical trapping .....                                                        | 34        |
| Isodesmic calculations .....                                                        | 35        |
| HRMS of crude reaction.....                                                         | 39        |
| Deuterium labeling experiment .....                                                 | 39        |

|                                                             |            |
|-------------------------------------------------------------|------------|
| <b>Analytical Data of Products .....</b>                    | <b>41</b>  |
| <b>NMR shifts.....</b>                                      | <b>41</b>  |
| <b>NMR Small Molecule Spectrum.....</b>                     | <b>48</b>  |
| <b>Determining the chemoselectivity of compound 5 .....</b> | <b>49</b>  |
| <b>Peptide products from batch reactions.....</b>           | <b>52</b>  |
| <b>References .....</b>                                     | <b>101</b> |

## General Information

Unless stated otherwise, all reactions were performed under an atmosphere of N<sub>2</sub> with magnetic stirring. Materials received from commercial suppliers were used directly without further purification. Bromides were purchased from Sigma-Aldrich and Combi-Blocks. Fmoc-protected amino acids were purchased from Chem-Impex. The organic solvents (reagent grade) used for reaction optimization and purification were purchased from Sigma Aldrich, Fisher Scientific, and Oakwood Chemicals. Thin-layer chromatography (TLC) was performed on silica gel coated aluminum TLC plates (Merck, TLC Silica gel 60 F<sub>254</sub>) and visualized using a UV lamp (254 nm) in combination with KMnO<sub>4</sub> stains. All reactions were performed with Blue LED lights (PR160L, 440 nm, 40 W) or Green LED lights (PR160L, 525 nm, 40 W) from Kessil while stirring on a Corning PC-620D stir plate at 1150 rpm. The products were purified by flash column chromatography on an automated Buchi Pure C-815 Flash instrument or on a Isolera 1 Biotage<sup>®</sup> instrument. <sup>1</sup>H NMR and <sup>13</sup>C NMR spectra were recorded on a Bruker Ascend<sup>™</sup> 400 NMR spectrometer. <sup>1</sup>H NMR and <sup>13</sup>C NMR spectra were referenced to CDCl<sub>3</sub> (7.26 ppm and 77.16 ppm), CD<sub>3</sub>CN (1.94 ppm), or CD<sub>3</sub>COD (3.31 ppm). Peak multiplicities are designated by the following abbreviations: s, singlet; d, doublet; dd, doublet of doublets; ddd, doublet of doublets of doublets; dddd, doublet of doublets of doublets of doublets; ddt, doublet of doublet of triplets; dtd, doublet of triplet of doublets; t, triplet; and m, multiplet. NMR Spectra were recorded at 298 K. The small molecule mass characterization was acquired on a LCT Premier (Waters Corp.) time of flight mass spectrometer (HRMS) with an electrospray ion source. LC chromatograms and mass characterizations for peptides were performed on a Waters Acquity UPLC H-Class with a Waters QDa Mass Detector. MS/MS data was acquired on a Quatro Ultima (Waters Corp.) triple quadrupole mass analyzer with an electrospray ion source. All LC chromatograms were recorded at 214 nm unless otherwise specified.

## Reaction Optimization

### Effect of photocatalyst identity on the reaction

**Procedure:** To a 1 mL clear glass shell vial (purchased from Analytical Sales & Services Inc.) charged with a small stir bar, Ac-Gly-Pro-Dha-Phe-NH<sub>2</sub> (1 mg, 2.3 μmol, 1 equiv.), 2-bromopyridine (1 μL, 11.7 μmol, 5 equiv.), photocatalyst (0.23 μmol, 0.1 equiv.), and ddH<sub>2</sub>O (577 μL, N<sub>2</sub> sparged for 5 minutes) were added. 1-benzyl-3-carbamoylpyridinium bromide was dissolved in 200 μL of ddH<sub>2</sub>O, and sodium cyanoborohydride was added until the solution turned yellow. The reduced nicotinamide was then added to the vial. The vial was purged under N<sub>2</sub> for 3 minutes, parafilm, and placed 7 cm away from two Blue or Green LED lights with stirring at 1150 rpm on the Corning PC-620D stir plate (under fan cooling) for fifteen hours. After that time, the sample was filtered and subjected to UPLC/MS analysis.

**Table S1.** Effect of photocatalyst identity on the reaction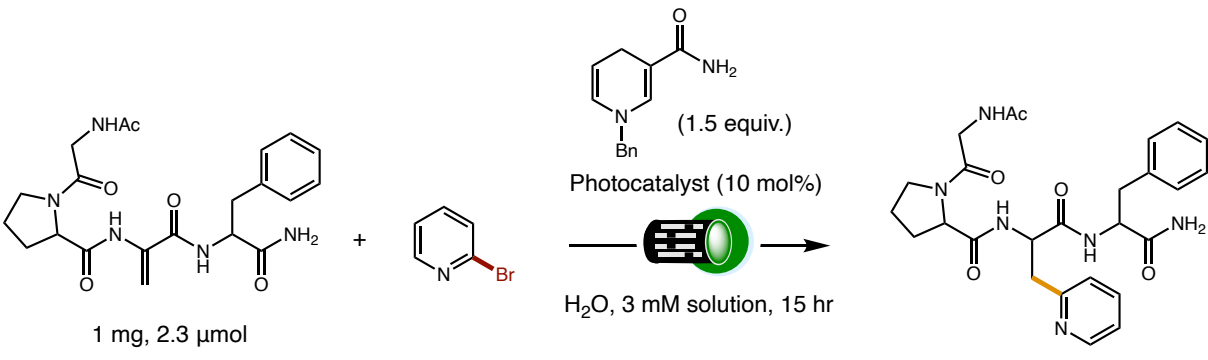

1 mg, 2.3  $\mu\text{mol}$

(1.5 equiv.)

Photocatalyst (10 mol%)

$\text{H}_2\text{O}$ , 3 mM solution, 15 hr

| Entry:    | Photocatalyst Identity:                      | Light Source:       | Conversion <sup>a</sup> |
|-----------|----------------------------------------------|---------------------|-------------------------|
| 1         | Ru(dtbbpy) <sub>3</sub>                      | Blue 440 nm         | 0%                      |
| 2         | Ru(bpz) <sub>3</sub> PF <sub>6</sub>         | Blue 440 nm         | <1%                     |
| 3         | Fluorescein                                  | Blue 440 nm         | 4%                      |
| 4         | Fluorescein                                  | Green 525 nm        | 0%                      |
| 5         | Rose Bengal                                  | Green 525 nm        | <1%                     |
| 6         | Eosin Y                                      | Green 525 nm        | 0%                      |
| 7         | Eosin B                                      | Green 525 nm        | 0%                      |
| 8         | Cu(dap) <sub>2</sub> Cl                      | Green 525 nm        | 0%                      |
| 9         | Erythrosine                                  | Green 525 nm        | <1%                     |
| 10        | Methylene Blue                               | Green 525 nm        | 0%                      |
| 11        | Carminic acid                                | Green 525 nm        | 0%                      |
| <b>12</b> | <b>Rhodamine B</b>                           | <b>Green 525 nm</b> | <b>21%</b>              |
| 13        | Rhodamine 6G                                 | Green 525 nm        | 0%                      |
| <b>14</b> | <b>Rhodamine B + DIPEA (no Nicotinamide)</b> | <b>Green 525 nm</b> | <b>30%</b>              |

<sup>a</sup> % Conversion determined by integrating the % area of product peaks vs. Dha peptide peaks using LC.

### Effect of catalyst loading on the reaction

**Procedure:** To a 1 mL clear glass shell vial (purchased from Analytical Sales & Services Inc.) charged with a small stir bar, Ac-Gly-Pro-Dha-Phe-NH<sub>2</sub> (1 mg, 2.3  $\mu\text{mol}$ , 1 equiv.), 2-bromopyridine (1  $\mu\text{L}$ , 11.7  $\mu\text{mol}$ , 5 equiv.) or 2-bromopyrimidine (2 mg, 11.7  $\mu\text{mol}$ , 5 equiv.), rhodamine B, diisopropylethylamine (0.6  $\mu\text{L}$ , 3.5  $\mu\text{mol}$ , 1.5 equiv.), and ddH<sub>2</sub>O (777  $\mu\text{L}$  total, N<sub>2</sub> sparged for 5 minutes) were added. The vial was purged under N<sub>2</sub> for 3 minutes, parafilm, and placed 7 cm away from two Green LED lights with stirring at 1150 rpm on the Corning PC-620D stir plate (under fan cooling) for fifteen hours. After that time, the sample was filtered and subjected to UPLC/MS analysis.

**Table S2.** Effect of catalyst loading on the reaction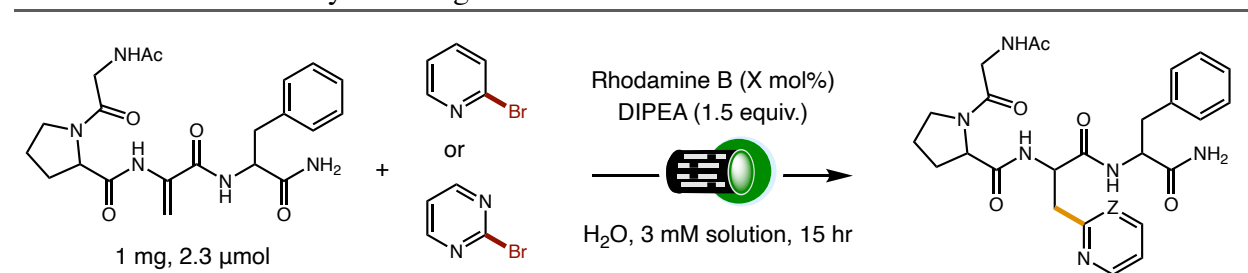

| Entry:   | mol% Pcat: | Bromoheterocycle:        | Conversion <sup>a</sup> |
|----------|------------|--------------------------|-------------------------|
| 1        | 10         | 2-bromopyridine          | 30%                     |
| 2        | 5          | 2-bromopyridine          | 23%                     |
| 3        | 3          | 2-bromopyridine          | 31%                     |
| <b>4</b> | <b>2</b>   | <b>2-bromopyridine</b>   | <b>44%</b>              |
| 5        | 1          | 2-bromopyridine          | 20%                     |
| 6        | 0.5        | 2-bromopyridine          | <17%                    |
| <b>7</b> | <b>2</b>   | <b>2-bromopyrimidine</b> | <b>52%</b>              |
| 8        | 0.5        | 2-bromopyrimidine        | 46%                     |

<sup>a</sup> % Conversion determined by integrating the % area of product peaks vs. Dha peptide peaks using LC.

### Effect of amine identity on the reaction

**Procedure:** To a 1 mL clear glass shell vial (purchased from Analytical Sales & Services Inc.) charged with a small stir bar, Ac-Gly-Pro-Dha-Phe-NH<sub>2</sub> (1 mg, 2.3 μmol, 1 equiv.), 2-bromopyrimidine (2 mg, 11.7 μmol, 5 equiv.), 40 μL of rhodamine B from a 1.16 mM stock solution in ddH<sub>2</sub>O (22 μg, 0.047 μmol, 2 mol%), amine (3.5 μmol, 1.5 equiv.), and ddH<sub>2</sub>O (777 μL total, N<sub>2</sub> sparged for 5 minutes) were added. The vial was purged under N<sub>2</sub> for 3 minutes, parafilm, and placed 7 cm away from two Green LED lights with stirring at 1150 rpm on the Corning PC-620D stir plate (under fan cooling) for fifteen hours. After that time, the sample was filtered and subjected to UPLC/MS analysis.

**Table S3.** Effect of amine identity on the reaction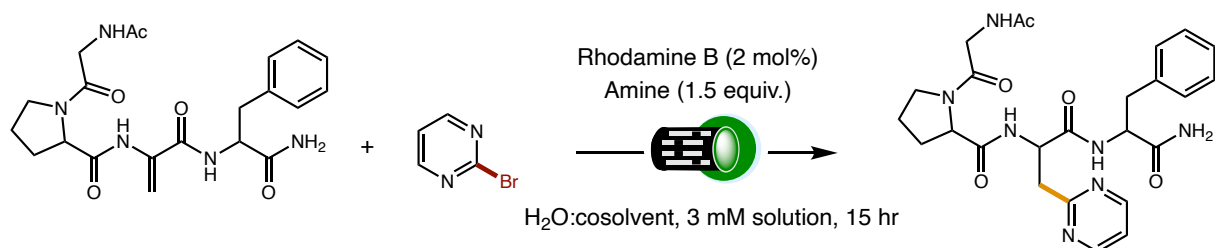

| Entry:    | Amine Identity:                 | Conversion <sup>a</sup> |
|-----------|---------------------------------|-------------------------|
| 1         | Tributylamine                   | <1%                     |
| 2         | Triisobutylamine                | 22%                     |
| 3         | Triphenylamine                  | <1%                     |
| 4         | Piperidine                      | 5%                      |
| 5         | 4-Methylmorpholine              | 11%                     |
| 6         | N,N-Dimethylglycine             | 2%                      |
| 7         | 4-Dimethylaminopyridine         | <1%                     |
| 8         | 1,4-Diazabicyclo[2.2.2]octane   | 2%                      |
| 9         | N,N,N',N'-Tetramethylenediamine | 33%                     |
| <b>10</b> | <b>Diisopropylethylamine</b>    | <b>52%</b>              |

<sup>a</sup> % Conversion determined by integrating the % area of product peaks vs. Dha peptide peaks using LC.

### Effect of cosolvent identity and ratio on the reaction

**Procedure:** To a 1 mL clear glass shell vial (purchased from Analytical Sales & Services Inc.) charged with a small stir bar, Ac-Gly-Pro-Dha-Phe-NH<sub>2</sub> (1 mg, 2.3 μmol, 1 equiv.), 2-bromopyrimidine (2 mg, 11.7 μmol, 5 equiv.), 40 μL of rhodamine B from a 1.16 mM stock solution in ddH<sub>2</sub>O (22 μg, 0.047 μmol, 2 mol%), diisopropylethylamine (0.6 μL, 3.5 μmol, 1.5 equiv.), cosolvent, and ddH<sub>2</sub>O (N<sub>2</sub> sparged for 5 minutes) were added. The vial was purged under N<sub>2</sub> for 3 minutes, parafilm, and placed 7 cm away from two Green LED lights with stirring at 1150 rpm on the Corning PC-620D stir plate (under fan cooling) for fifteen hours. After that time, the sample was filtered and subjected to UPLC/MS analysis.

**Table S4.** Effect of cosolvent identity and ratio on the reaction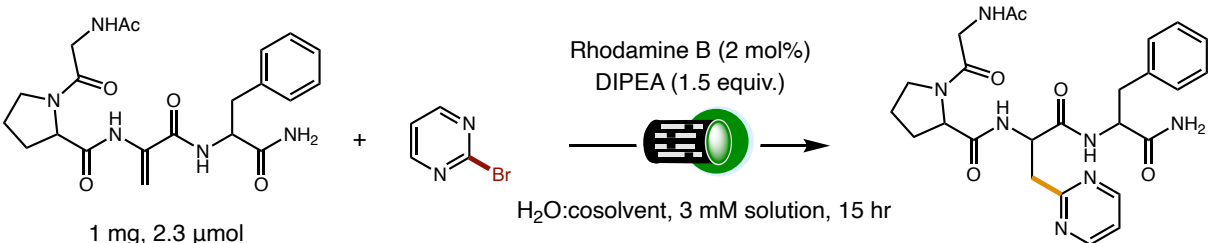

1 mg, 2.3  $\mu\text{mol}$

Rhodamine B (2 mol%)  
DIPEA (1.5 equiv.)

H<sub>2</sub>O:cosolvent, 3 mM solution, 15 hr

| Entry: | Cosolvent Identity:                             | Ratio of H <sub>2</sub> O:Cosolvent: | Conversion <sup>a</sup> |
|--------|-------------------------------------------------|--------------------------------------|-------------------------|
| 1      | Dimethyl sulfoxide                              | 95:5                                 | 28%                     |
| 2      | N,N-Dimethylformamide                           | 95:5                                 | 40%                     |
| 3      | Methanol                                        | 95:5                                 | 40%                     |
| 4      | Ethanol                                         | 95:5                                 | 31%                     |
| 5      | Isopropanol                                     | 95:5                                 | 22%                     |
| 6      | tert-Butanol                                    | 95:5                                 | 47%                     |
| 7      | Methyl Acetate                                  | 95:5                                 | 5%                      |
| 8      | Glycerol                                        | 95:5                                 | 7%                      |
| 9      | 1,1,1,3,3,3-Hexafluoro-2-propanol               | 95:5                                 | 2%                      |
| 10     | Acetonitrile                                    | 95:5                                 | 38%                     |
| 11     | 2,2,2-Trifluoroethanol                          | 95:5                                 | 80%                     |
| 12     | <b>2,2,2-Trifluoroethanol/<br/>Acetonitrile</b> | <b>90:5:5</b>                        | <b>87%</b>              |

<sup>a</sup> % Conversion determined by integrating the % area of product peaks vs. Dha peptide peaks using LC.

### Effect of scaling the reaction

**Procedure:** To a 2-dram vial charged with a stir bar, Ac-Gly-Pro-Dha-Phe-NH<sub>2</sub> (10 mg, 23.3  $\mu\text{mol}$ , 1 equiv.), 2-bromopyrimidine (19 mg, 117  $\mu\text{mol}$ , 5 equiv.), 400  $\mu\text{L}$  or 100  $\mu\text{L}$  of rhodamine B from a 1.16 mM stock solution in ddH<sub>2</sub>O (0.22 mg, 0.47  $\mu\text{mol}$ , 2 mol%) or (56  $\mu\text{g}$ , 0.12  $\mu\text{mol}$ , 0.5 mol%), diisopropylethylamine (6  $\mu\text{L}$ , 35  $\mu\text{mol}$ , 1.5 equiv.), 2,2,2-trifluoroethanol (389  $\mu\text{L}$ ), acetonitrile (389  $\mu\text{L}$ ), and ddH<sub>2</sub>O (7 mL total, N<sub>2</sub> sparged for 5 minutes) were added. The vial was purged under N<sub>2</sub> for 5 minutes, parafilm, and placed 1 cm away from two Green LED lights with stirring at 1150 rpm on the Corning PC-620D stir plate (under fan cooling) for fifteen hours. After that time, the sample was washed with dichloromethane twice and subjected to UPLC/MS analysis to determine % conversion. The products were then concentrated using a rotavapor, redissolved in minimal water, and purified by reverse phase flash chromatography (acetonitrile:H<sub>2</sub>O) using a Biotage® Sfär C18 Duo column.

**Table S5.** Effect of scaling the reaction

| Entry: | mol% Pcat: | Conversion <sup>a</sup> | Isolated Yield: |
|--------|------------|-------------------------|-----------------|
| 1      | 2          | 97%                     | 67%             |
| 2      | <b>0.5</b> | <b>&gt;99%</b>          | <b>77%</b>      |

<sup>a</sup> % Conversion determined by integrating the % area of product peaks vs. Dha peptide peaks using LC.

### Effect of using NH<sub>2</sub>-Gly-Pro-Dha-Phe-CO<sub>2</sub>H as peptide

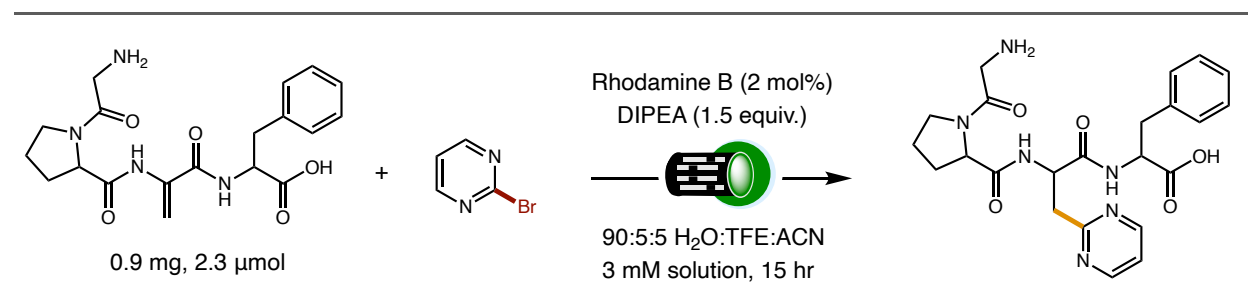

**Procedure:** To a 1 mL clear glass shell vial (purchased from Analytical Sales & Services Inc.) charged with a small stir bar, NH<sub>2</sub>-Gly-Pro-Dha-Phe-CO<sub>2</sub>H (0.9 mg, 2.3 μmol, 1 equiv.), 2-bromopyrimidine (2 mg, 11.7 μmol, 5 equiv.), 40 μL of rhodamine B from a 1.16 mM stock solution in ddH<sub>2</sub>O (22 μg, 0.047 μmol, 2 mol%), diisopropylethylamine (0.6 μL, 3.5 μmol, 1.5 equiv.), 2,2,2-trifluoroethanol (39 μL), acetonitrile (39 μL), and ddH<sub>2</sub>O (700 μL total, N<sub>2</sub> sparged for 5 minutes) were added. The vial was purged under N<sub>2</sub> for 3 minutes, parafilm, and placed 7 cm away from two Green LED lights with stirring at 1150 rpm on the Corning PC-620D stir plate (under fan cooling) for fifteen hours. After that time, the sample was filtered and subjected to UPLC/MS analysis Supelco Discovery Bio Wide Pore C8 (3.0 μ, 4.6 mm x 10 cm) column using the method below (44% conversion).

A = Acetonitrile with 1% formic acid modifier, B = ddH<sub>2</sub>O with 1% formic acid modifier.

| Time: | %A:  | %B:  |
|-------|------|------|
| 0.0   | 5.0  | 95.0 |
| 2.0   | 5.0  | 95.0 |
| 3.0   | 10.0 | 90.0 |
| 9.0   | 30.0 | 70.0 |
| 17.0  | 50.0 | 50.0 |



|      |      |      |
|------|------|------|
| 17.5 | 95.0 | 5.0  |
| 19.0 | 95.0 | 5.0  |
| 19.5 | 5.0  | 95.0 |
| 20.0 | 5.0  | 95.0 |

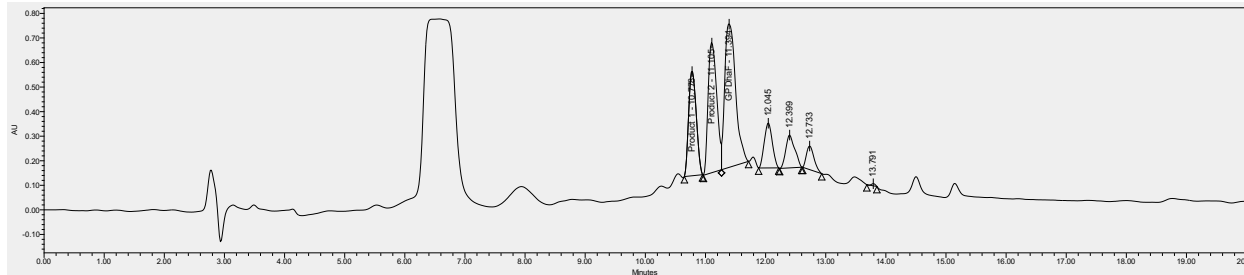

|   | Name      | Retention Time | Area    | % Area |
|---|-----------|----------------|---------|--------|
| 1 | Product 1 | 10.778         | 3747727 | 18.41  |
| 2 | Product 2 | 11.105         | 5288231 | 25.98  |
| 3 | GPDhaF    | 11.394         | 7352501 | 36.13  |
| 4 |           | 12.045         | 1702657 | 8.37   |
| 5 |           | 12.399         | 1375380 | 6.76   |
| 6 |           | 12.733         | 845225  | 4.15   |
| 7 |           | 13.791         | 40034   | 0.20   |

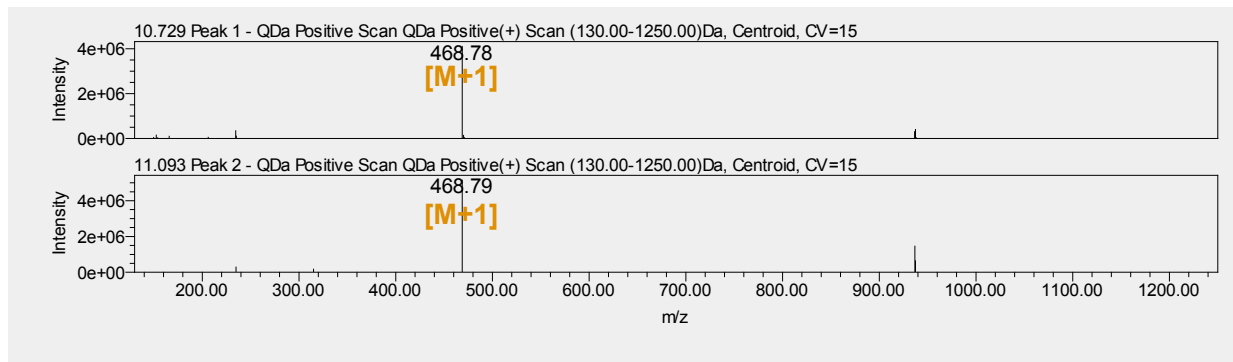

## Experimental Procedures

Picture of reaction setups

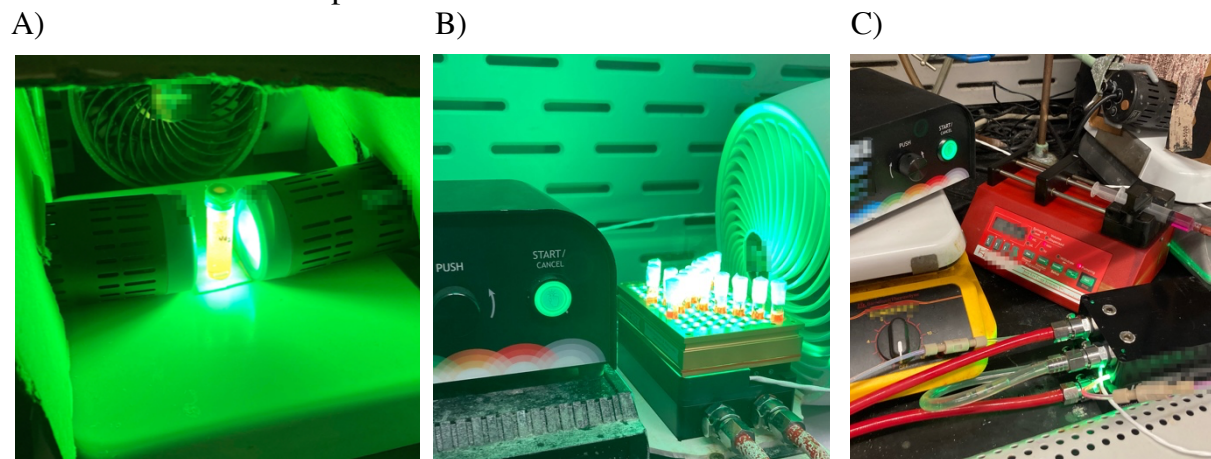

**Figure S1.** Reaction setup photographs. A) Batch synthesis. B) Parallel Synthesis. C) Flow Synthesis.

### General procedure for the synthesis of pyrimidine sidechains

To a 2-dram vial charged with a stir bar, Ac-Gly-Pro-Dha-Phe-NH<sub>2</sub> (10 mg, 23.3 μmol, 1 equiv.), bromopyrimidine (117 μmol, 5 equiv.), 100 μL of rhodamine B from a 1.16 mM stock solution in ddH<sub>2</sub>O (56 μg, 0.12 μmol, 0.5 mol%), diisopropylethylamine (6 μL, 35 μmol, 1.5 equiv.), 2,2,2-trifluoroethanol (389 μL), acetonitrile (389 μL), and ddH<sub>2</sub>O (7 mL total, N<sub>2</sub> sparged for 5 minutes) were added. The vial was purged under N<sub>2</sub> for 5 minutes, parafilmmed, and placed 1 cm away from two Green LED lights with stirring at 1150 rpm on the Corning PC-620D stir plate (under fan cooling) for fifteen hours. After that time, the sample was washed with dichloromethane twice and subjected to UPLC/MS analysis to determine % conversion (defined as the % area of the product peaks at 214 nm as compared to all other peptide peaks in the LC chromatogram). The products were then concentrated using a rotavapor, redissolved in minimal water, and purified by reverse phase flash chromatography (acetonitrile:H<sub>2</sub>O) using a Biotage® Sfar C18 Duo column.

### General procedure for the synthesis of purine sidechains

To a 2-dram vial charged with a stir bar, bromopurine (117 μmol, 5 equiv.), acetonitrile (389 μL), and up to 4 mL of ddH<sub>2</sub>O were added. The bromopurine was then dissolved in the solution as much as possible using heat and sonication as necessary (Note: this pre-dissolving step is essential to the success of these reactions). After the vial has cooled, Ac-Gly-Pro-Dha-Phe-NH<sub>2</sub> (10 mg, 23.3 μmol, 1 equiv.), 100 μL of rhodamine B from a 1.16 mM stock solution in ddH<sub>2</sub>O (56 μg, 0.12 μmol, 0.5 mol%), diisopropylethylamine (6 μL, 35 μmol, 1.5 equiv.), 2,2,2-trifluoroethanol (389 μL), and the rest of the ddH<sub>2</sub>O (7 mL total, N<sub>2</sub> sparged for 5 minutes) were added. The vial was purged under N<sub>2</sub> for 5 minutes, parafilmmed, and placed 1 cm away from two Green LED lights with stirring at 1150 rpm on the Corning PC-620D stir plate (under fan cooling) for fifteen hours. After that time, the sample was washed with dichloromethane twice and subjected to UPLC/MS analysis

to determine % conversion (defined as the % area of the product peaks at 214 nm as compared to all other peptide peaks in the LC chromatogram). The products were then concentrated using a rotavapor, redissolved in minimal water, and purified by reverse phase flash chromatography (acetonitrile:H<sub>2</sub>O) using a Biotage® Sfär C18 Duo column.

**Deviation 1:** In some cases, the products partition into the organic layer. These reactions were washed with diethyl ether instead.

**Deviation 2:** In some cases, the Dha-peptide eluted with a similar retention time to the products (as indicated). These reactions were transferred to a 1-dram vial containing 20 mg of 2-mercaptoethylamine, polymer-bound resin and 10 mg of TCEP.<sup>[1]</sup> The vial was heated to 40 °C for two hours to remove the remaining Dha-peptide. The solution was then filtered and purified by reverse phase flash chromatography (acetonitrile:H<sub>2</sub>O).

## Synthesis of cysteine-containing peptides

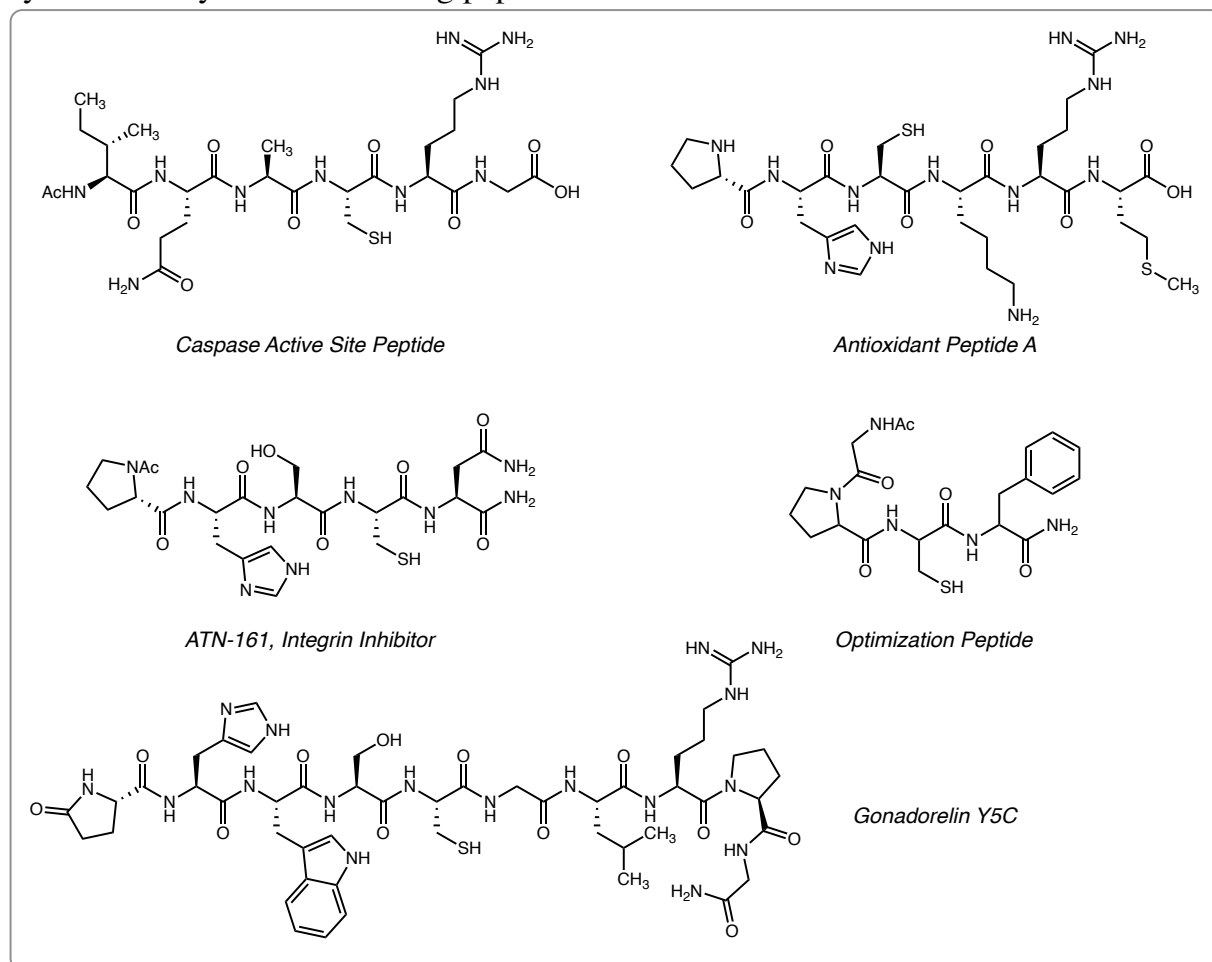

**Figure S2.** Cysteine-containing peptides synthesized.

All cysteine-containing peptides were synthesized by solid phase peptide synthesis using Fmoc-protected amino acids on rink amide resin or 2-chlorotrityl chloride resin, cleaved with 95:2.5:2.5 TFA:TIPS:H<sub>2</sub>O solution, and purified by reverse phase flash chromatography. All peptide products were analyzed on a Supelco Discovery Bio Wide Pore C8 (3.0 μ, 4.6 mm x 10 cm) column using one of the two methods below.

A = Acetonitrile with 1% formic acid modifier, B = ddH<sub>2</sub>O with 1% formic acid modifier.

*ATN-161 and Antioxidant Peptide A:*

0.4 mL/min flow rate

| Time: | %A:  | %B:   |
|-------|------|-------|
| 0.0   | 0.0  | 100.0 |
| 1.0   | 0.0  | 100.0 |
| 2.0   | 5.0  | 95.0  |
| 10.5  | 95.0 | 5.0   |
| 12.0  | 95.0 | 5.0   |

*All other peptides:*

0.5 mL/min flow rate

| Time: | %A:  | %B:  |
|-------|------|------|
| 0.0   | 5.0  | 95.0 |
| 2.0   | 5.0  | 95.0 |
| 10.5  | 95.0 | 5.0  |
| 12.0  | 95.0 | 5.0  |

### Caspase Active Site Peptide:

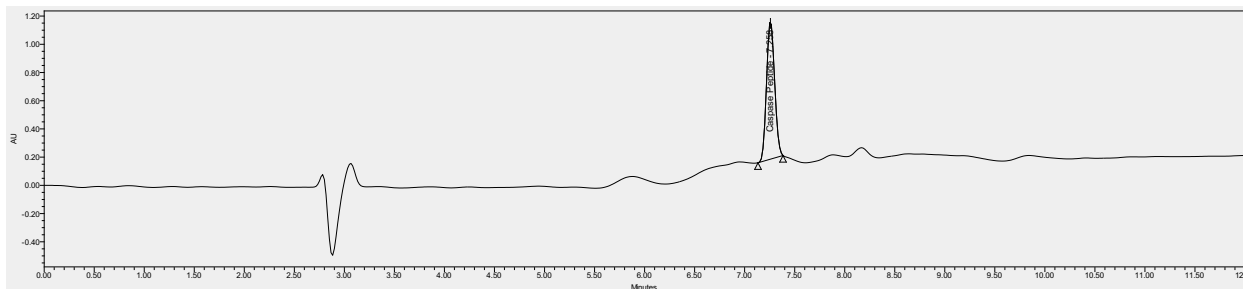

|   | Name            | Retention Time | Area    | % Area |
|---|-----------------|----------------|---------|--------|
| 1 | Caspase Peptide | 7.258          | 5486993 | 100.00 |

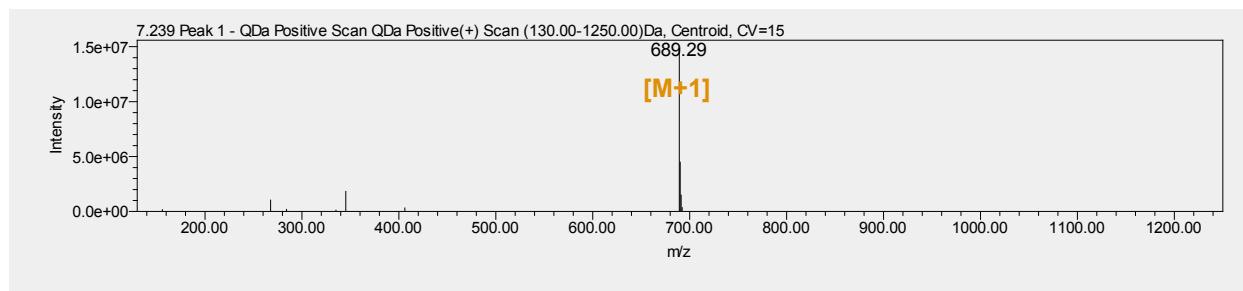

### Antioxidant Peptide A:

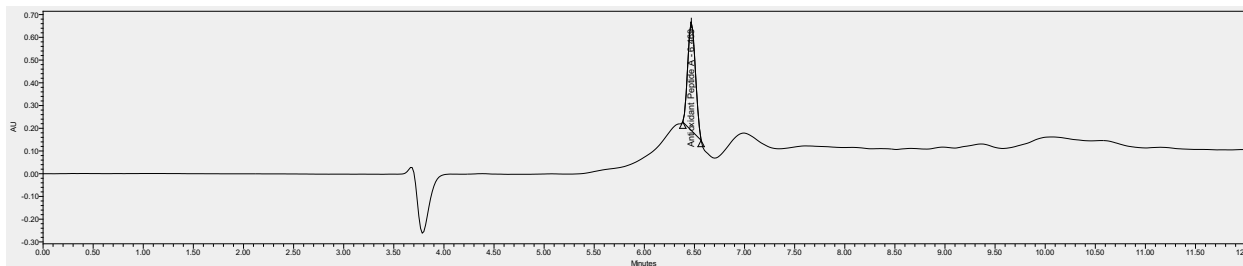

|   | Name                  | Retention Time | Area    | % Area |
|---|-----------------------|----------------|---------|--------|
| 1 | Antioxidant Peptide A | 6.469          | 2527061 | 100.00 |

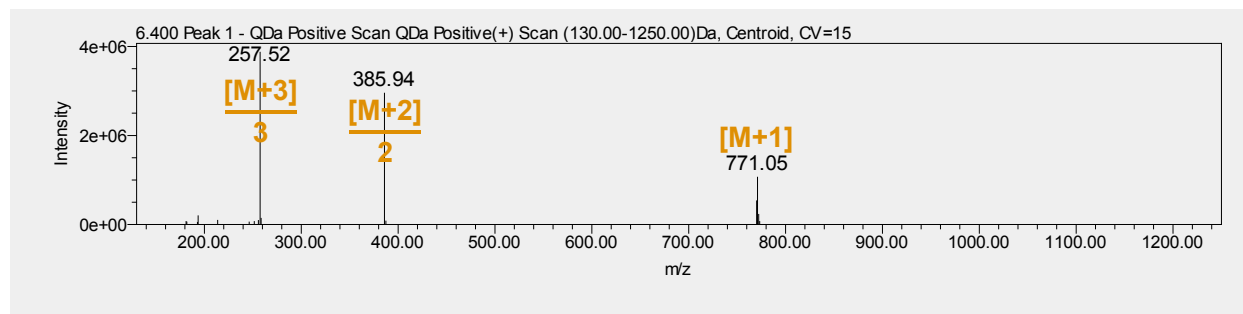

**ATN-161, Integrin Inhibitor:**

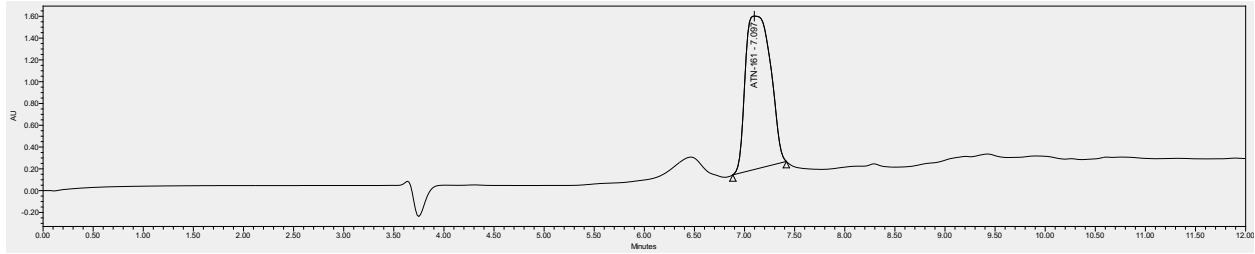

|   | Name    | Retention Time | Area     | % Area |
|---|---------|----------------|----------|--------|
| 1 | ATN-161 | 7.097          | 24467853 | 100.00 |

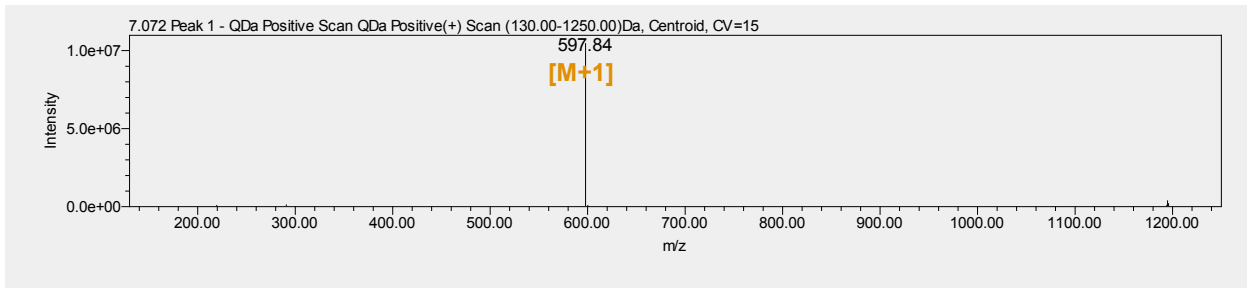

**Gonadorelin Y5C:**

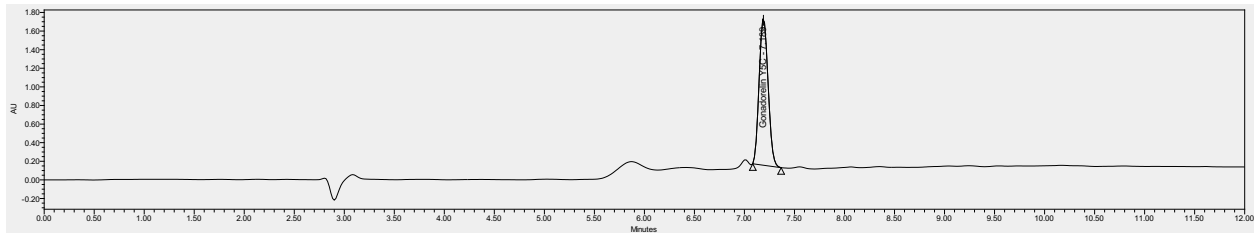

|   | Name            | Retention Time | Area    | % Area |
|---|-----------------|----------------|---------|--------|
| 1 | Gonadorelin Y5C | 7.189          | 9810992 | 100.00 |

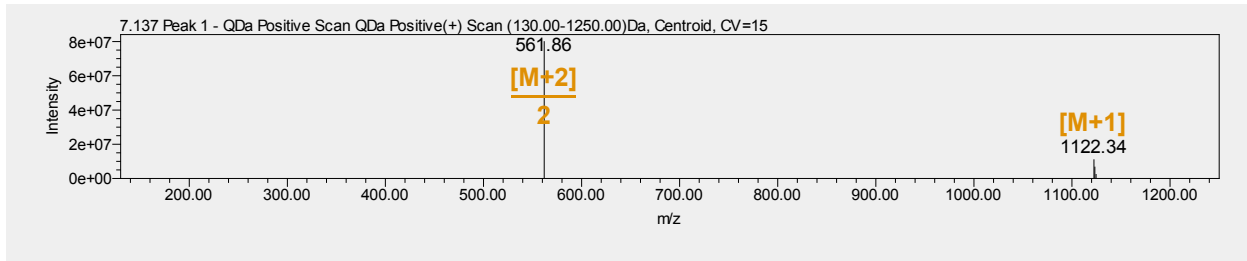

## Synthesis of Dha-containing peptides

### General Procedure:

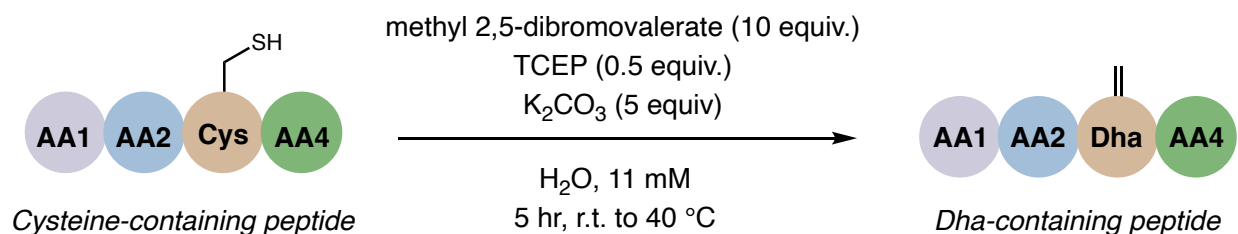

To a 50 mL flask or a 20 mL scintillation vial charged with a stir bar, peptide, TCEP, and water were added and stirred at room temperature for 1 hour. Potassium carbonate and methyl 2,5-dibromovalerate were then added, and the solution was stirred for another hour at room temperature. The reaction was then heated to 40 °C for 3 hours while monitoring for full conversion by UPLC/MS. Upon completion, the reaction was washed with ethyl acetate, concentrated, and purified by reverse phase flash chromatography (acetonitrile:H<sub>2</sub>O).

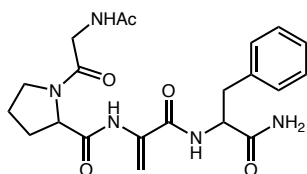

**Ac-Gly-Pro-Dha-Phe-NH<sub>2</sub>** was synthesized according to the reported procedure.<sup>[1]</sup>

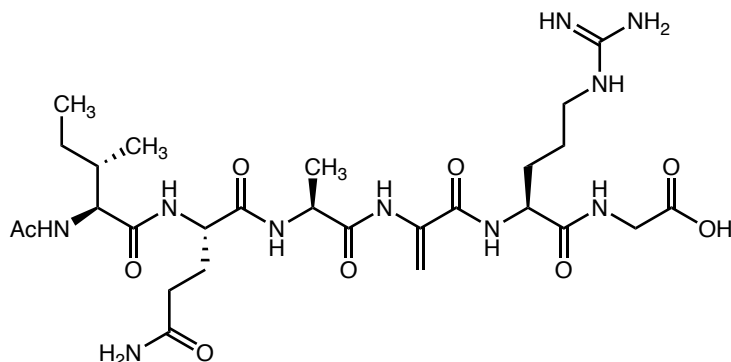

**Caspase Active Site Peptide C4Dha** was synthesized on a 60 μmol scale according to the general procedure (with the exception of not washing with ethyl acetate upon completion of the reaction) to yield 14.8 mg of pure peptide (38% yield).

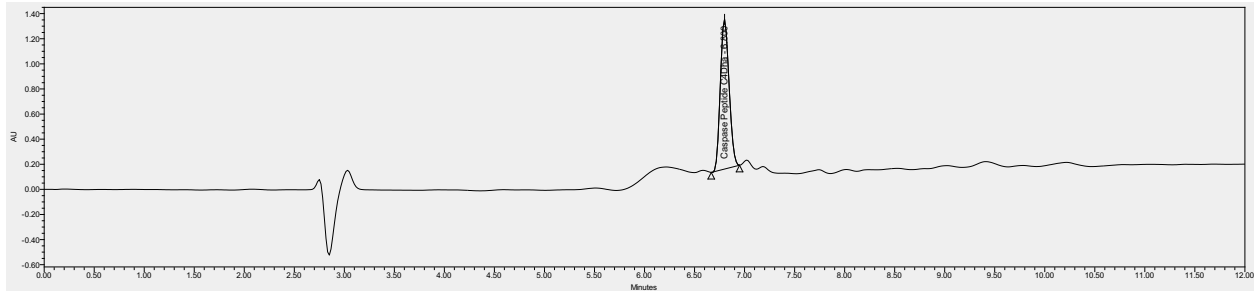

|   | Name                  | Retention Time | Area    | % Area |
|---|-----------------------|----------------|---------|--------|
| 1 | Caspase Peptide C4Dha | 6.800          | 7251089 | 100.00 |

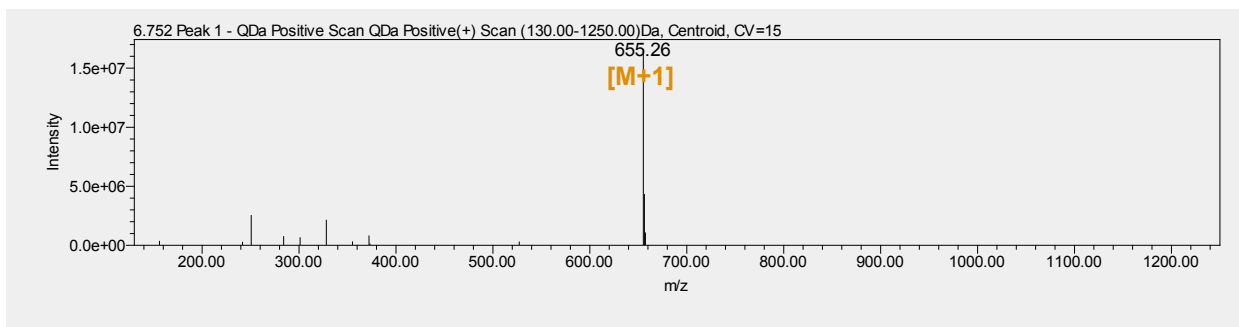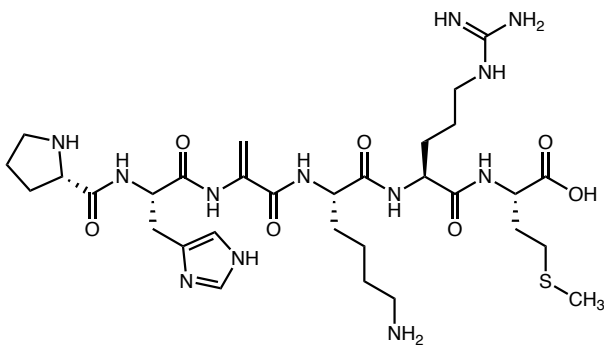

**Antioxidant Peptide A C3Dha** was synthesized on a 65  $\mu\text{mol}$  scale according to the general procedure to yield 7.0 mg of pure peptide (15% yield).

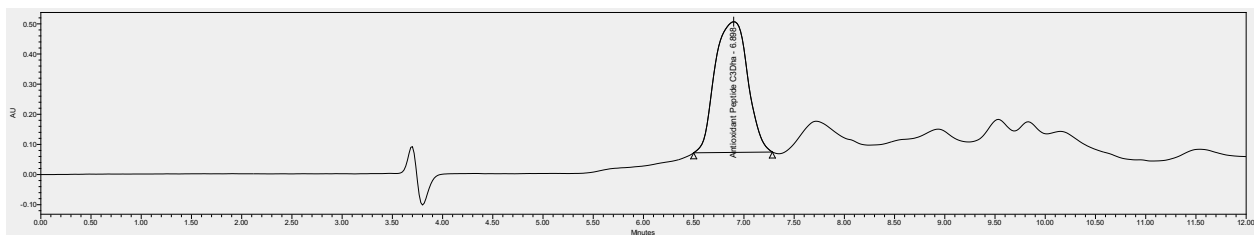

|   | Name                      | Retention Time | Area    | % Area |
|---|---------------------------|----------------|---------|--------|
| 1 | Antioxidant Peptide C3Dha | 6.898          | 9817482 | 100.00 |



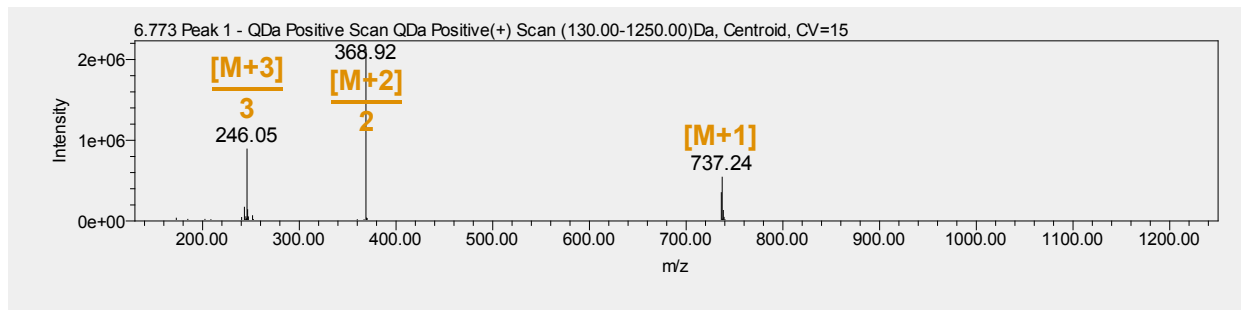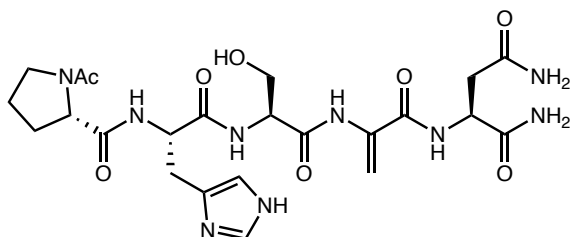

**ATN-161 C4Dha** was synthesized on an 84  $\mu\text{mol}$  scale according to the general procedure to yield 16.9 mg of pure peptide (36% yield).

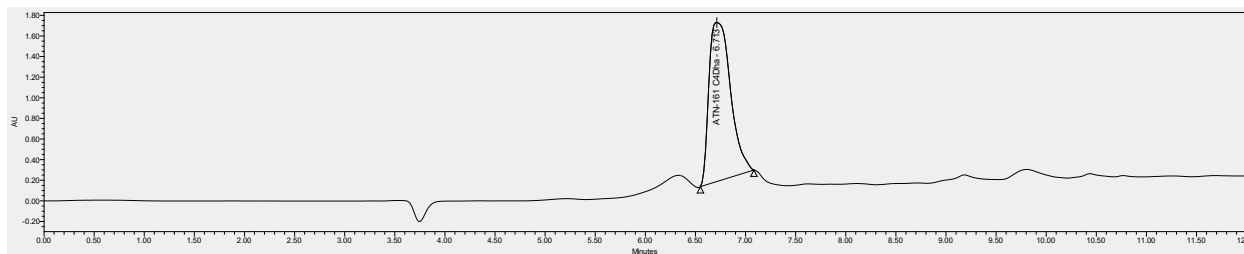

|   | Name          | Retention Time | Area     | % Area |
|---|---------------|----------------|----------|--------|
| 1 | ATN-161 C4Dha | 6.713          | 23078837 | 100.00 |

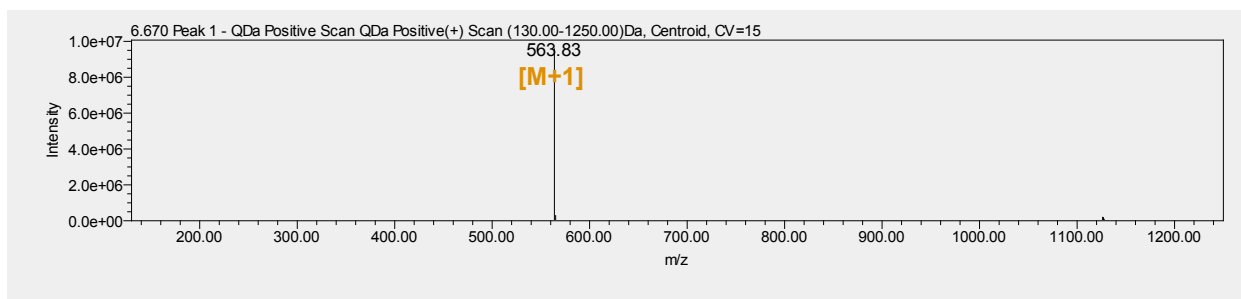



organic layer was dried with  $\text{MgSO}_4$ , filtered, and concentrated under reduced pressure. The crude product was purified using normal phase flash chromatography (ethyl acetate/hexanes) to give 220 mg of pure product (61% yield).

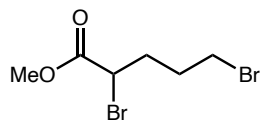

**Methyl 2,5-dibromovalerate** was synthesized according to the reported procedure.<sup>[2]</sup>

## Parallel Synthesis

### Procedure for parallel synthesis

To sixteen 1 mL shell vials (Thermo Fisher Scientific) each charged with a stir bar, sixteen distinct bromides (11.7  $\mu\text{mol}$ , 5 equiv.) were added. Diisopropylethylamine (0.6  $\mu\text{L}$ , 3.5  $\mu\text{mol}$ , 1.5 equiv.), 2,2,2-trifluoroethanol (39  $\mu\text{L}$ ), acetonitrile (39  $\mu\text{L}$ ), Ac-Gly-Pro-Dha-Phe-NH<sub>2</sub> (1 mg, 2.3  $\mu\text{mol}$ , 1 equiv.), rhodamine B (22  $\mu\text{g}$ , 0.047  $\mu\text{mol}$ , 2.0 mol%), and ddH<sub>2</sub>O (700  $\mu\text{L}$  total, N<sub>2</sub> sparged for 5 minutes) were added to each vial. Ac-Gly-Pro-Dha-Phe-NH<sub>2</sub> and rhodamine B were added by first creating a stock solution in ddH<sub>2</sub>O and distributing the appropriate amounts among the vials. Each vial was individually capped and purged under N<sub>2</sub> for 3 minutes, parafilm, and placed on the Lumidox® 96-well LED array (527 nm). The reactions were illuminated under water recirculation and fan cooling while stirring at ~350 rpm using a VP 710-C5 from V&P Scientific Inc. for 15 hours. Upon completion of the reaction, each cap was removed and ~10 equiv. of TCEP and 10 equiv. of 2-mercaptoethylamine, polymer-bound resin was added to each vial. The vials were stirred in a water bath at 40 °C for 5 hours. After this, the vials were filtered using a 96-well filter plate, removing excess Dha peptide. Next, diethyl ether extraction was performed by adding ~300  $\mu\text{L}$  of diethyl ether to each well and extracting the aqueous phase of each well with a glass pipette to remove the bromide. Finally, Waters Oasis HLB 96-well Plate (60 mg sorbent per well) was used to remove rhodamine B. The sorbent was first washed and filtered with 1 mL of methanol and 1 mL of water. The sample solutions were then loaded onto the sorbent and filtered. The sorbent was washed by filtering 1 mL of a 5% NaOH solution through each well, and the products were eluted with 1 mL of a 50% trifluoroethanol solution in water. The products were then submitted to a UPLC for analysis of purity and yield using a Waters Zorbax StableBondC18 3.5  $\mu\text{m}$ , 2.1 x 100 mm column with a 0.5 mL/min flow rate using the method below. (Note: In our run, some NaOH solution eluted with our products allowing the samples to be readily buffered and stored if desired. If no buffer is preferred, each sorbent well should be washed with 1 mL of water after the wash step with 5% NaOH and prior to the trifluoroethanol elution step.)

A = Acetonitrile with 1% formic acid modifier, B = ddH<sub>2</sub>O with 1% formic acid modifier.

| Time: | %A:  | %B:  |
|-------|------|------|
| 0.0   | 5.0  | 95.0 |
| 2.0   | 5.0  | 95.0 |
| 3.0   | 10.0 | 90.0 |
| 10.0  | 20.0 | 80.0 |
| 12.0  | 30.0 | 70.0 |
| 16.5  | 95.0 | 5.0  |
| 18.0  | 95.0 | 5.0  |

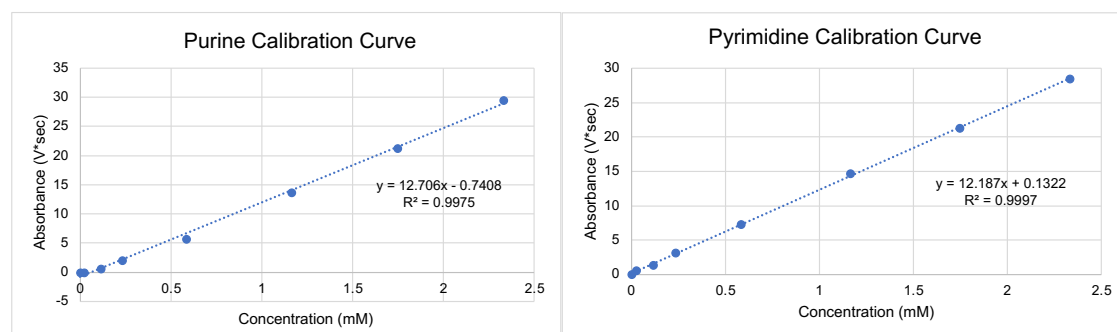

**Figure S3.** Calibration curves for the pyrimidine (compound **1**) and purine (compound **11**) cNPs

### Results from parallel synthesis

Purity, amount, and yield were all determined from the UPLC spectrum. Amount and yield were determined by building a calibration curve for the pyrimidine nucleobases using the simple pyrimidine heterocycle cNP (compound **1**) and for the purine nucleobases using the simple purine heterocycle cNP (compound **11**). For the two aryl products (compounds **19** and **20**), the amounts were calculated from a variant of the Beer-Lambert's Law as described previously.<sup>[1]</sup>

**Table S6.** Results from parallel synthesis

| cNP Product: | MW:   | Purity: | Yield of Epimers: | Amount: (mg) |
|--------------|-------|---------|-------------------|--------------|
| <b>1</b>     | 509.6 | 81.80%  | 24.9%             | 0.30         |
| <b>2</b>     | 509.6 | 0%      | 0%                | 0.0          |
| <b>3</b>     | 527.6 | 91.3%   | 2.8%              | 0.03         |
| <b>4</b>     | 544.0 | 90.0%   | 35.7%             | 0.45         |
| <b>5</b>     | 588.5 | 79.2%   | 16.6%             | 0.23         |
| <b>6</b>     | 523.6 | 15.5%   | 1.2%              | 0.01         |
| <b>7</b>     | 524.6 | 0%      | 0%                | 0.0          |
| <b>8</b>     | 549.6 | 0%      | 0%                | 0.0          |
| <b>9</b>     | 525.6 | 0%      | 0%                | 0.0          |
| <b>11</b>    | 549.6 | 0%      | 0%                | 0.0          |
| <b>12</b>    | 564.6 | 0%      | 0%                | 0.0          |
| <b>13</b>    | 548.6 | 81.5%   | 71.2%             | 0.91         |
| <b>14</b>    | 548.6 | 66.8%   | 19.9%             | 0.25         |
| <b>15</b>    | 548.6 | 90.0%   | 17.3%             | 0.22         |
| <b>19</b>    | 549.6 | 92.0%   | 4.4%              | 0.06         |
| <b>20</b>    | 535.6 | 8.1%    | 1.0%              | 0.01         |

Background spectrum:

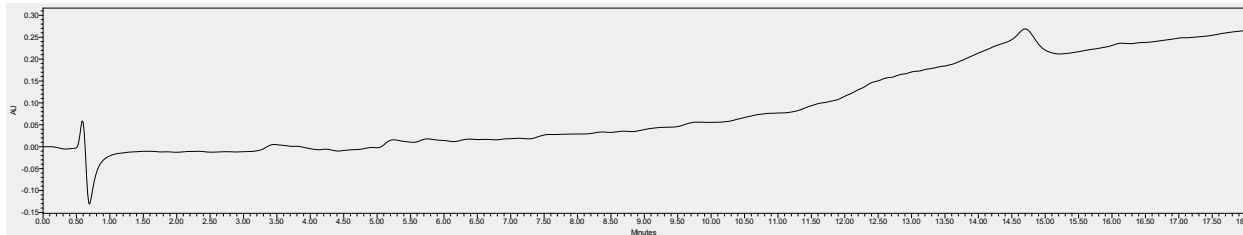

1: MW = 509.6 g/mol, Purity = 81.8%, Yield = 24.9% [0.30 mg]

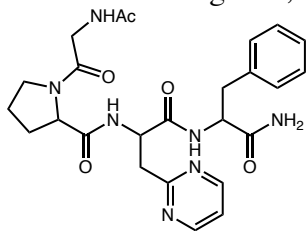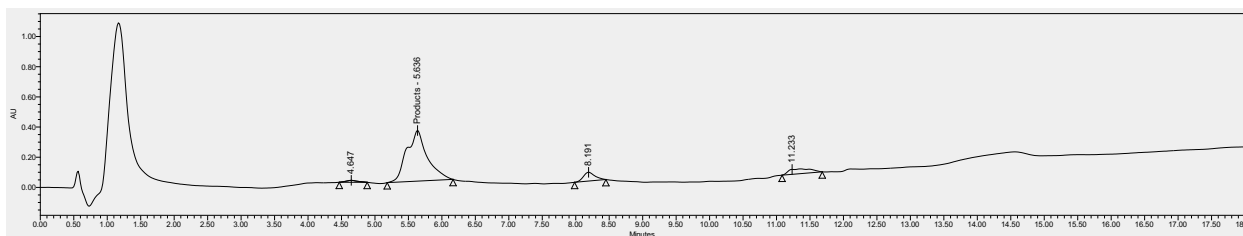

|   | Name     | Retention Time | Area    | % Area |
|---|----------|----------------|---------|--------|
| 1 |          | 4.647          | 151630  | 1.72   |
| 2 | Products | 5.636          | 7196903 | 81.87  |
| 3 |          | 8.191          | 698166  | 7.94   |
| 4 |          | 11.233         | 744171  | 8.47   |

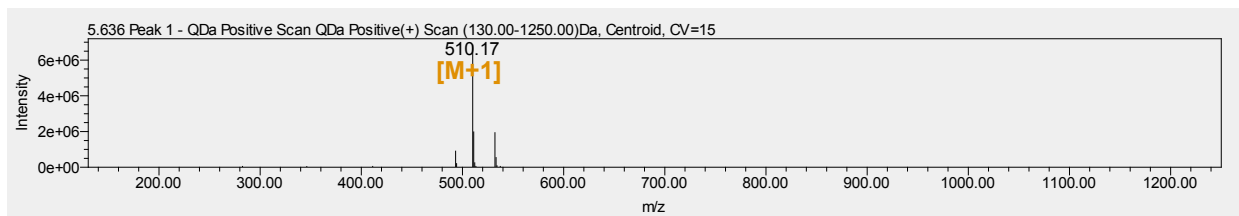

2: MW = 509.6 g/mol, Purity = 0%, Yield = 0% [0.0 mg]

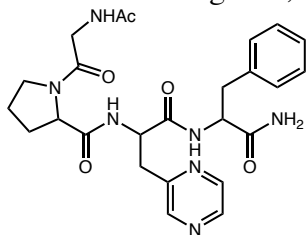

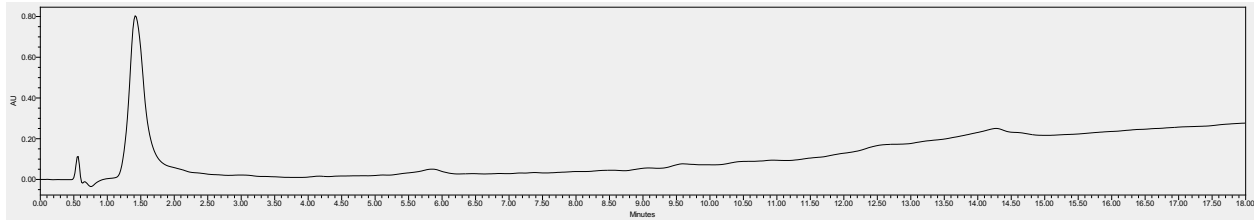

**3:** MW = 527.6 g/mol, Purity = 91.3%, Yield = 2.8% [0.03 mg]

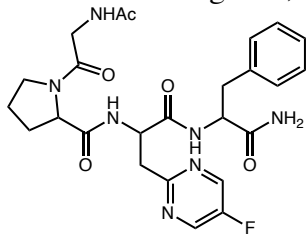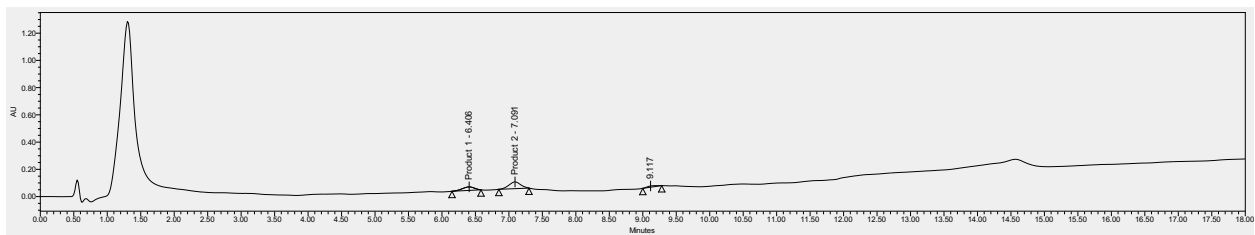

|   | Name      | Retention Time | Area   | % Area |
|---|-----------|----------------|--------|--------|
| 1 | Product 1 | 6.406          | 327722 | 32.13  |
| 2 | Product 2 | 7.091          | 603078 | 59.13  |
| 3 |           | 9.117          | 89054  | 8.73   |

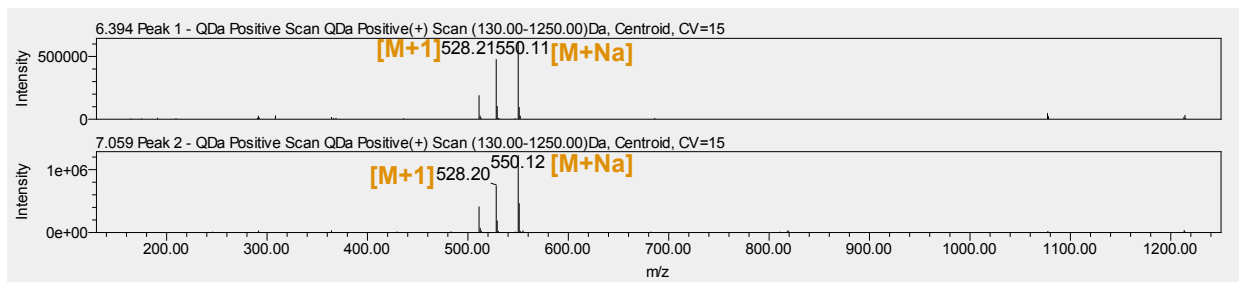

**4:** MW = 544.0 g/mol, Purity = 90.0%, Yield = 35.7% [0.45 mg]

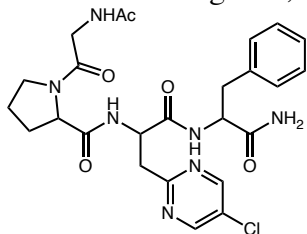

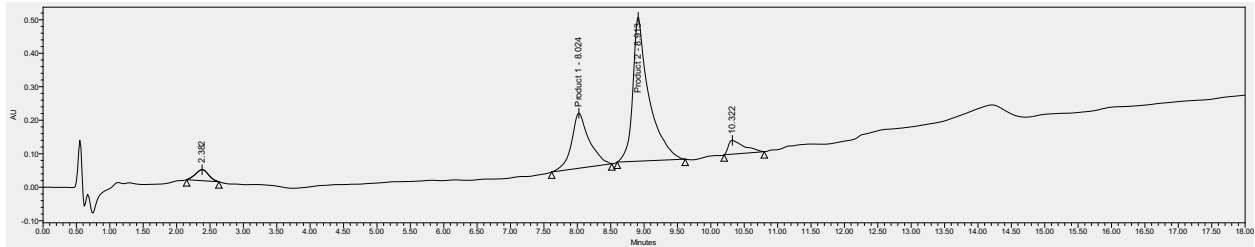

|   | Name      | Retention Time | Area    | % Area |
|---|-----------|----------------|---------|--------|
| 1 |           | 2.382          | 448889  | 3.94   |
| 2 | Product 1 | 8.024          | 3023418 | 26.54  |
| 3 | Product 2 | 8.913          | 7237362 | 63.53  |
| 4 |           | 10.322         | 681693  | 5.98   |

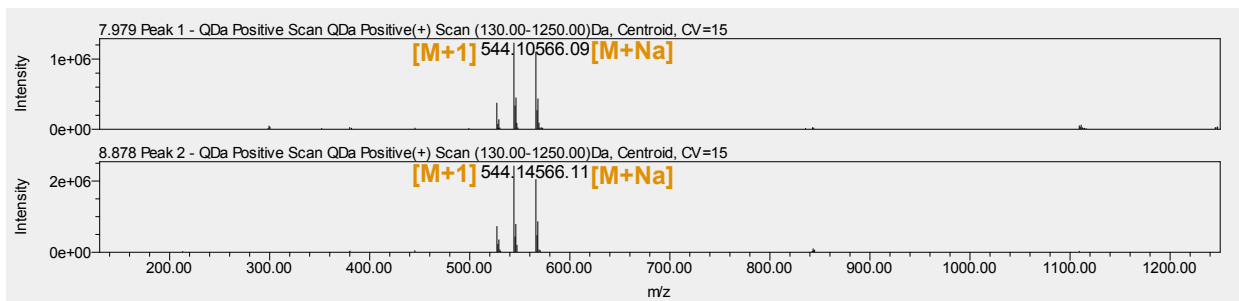

**5:** MW = 588.5 g/mol, Purity = 79.2%, Yield = 16.6% [0.23 mg]

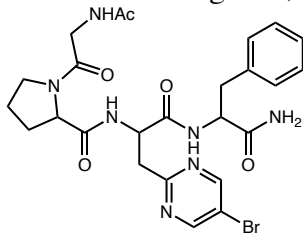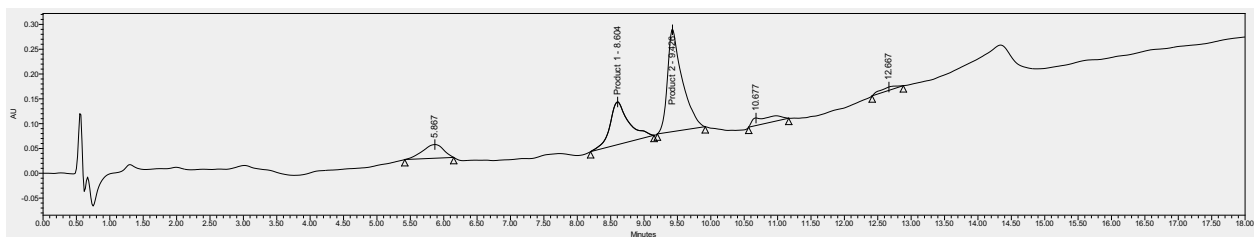

|   | Name      | Retention Time | Area    | % Area |
|---|-----------|----------------|---------|--------|
| 1 |           | 5.867          | 606740  | 10.24  |
| 2 | Product 1 | 8.604          | 1693447 | 28.57  |
| 3 | Product 2 | 9.426          | 3164475 | 53.38  |
| 4 |           | 10.677         | 337422  | 5.69   |
| 5 |           | 12.667         | 125994  | 2.13   |



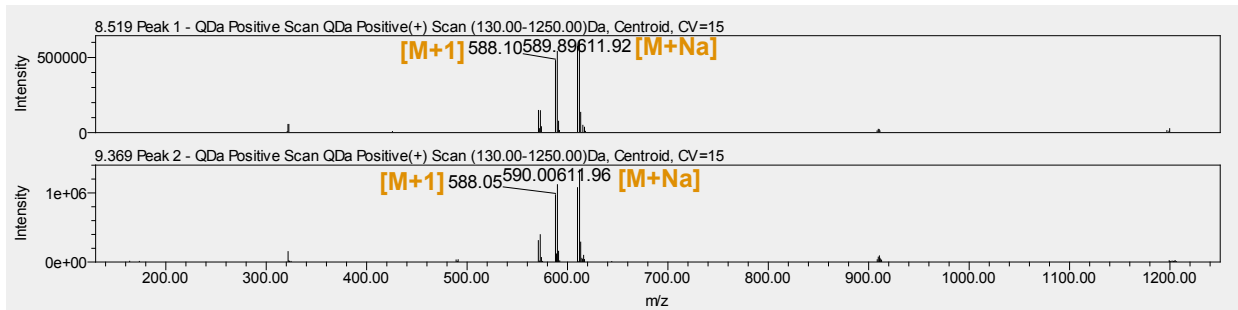

**6:** MW = 523.6 g/mol, Purity = 15.5%, Yield = 1.2% [0.01 mg]

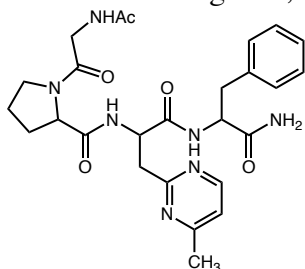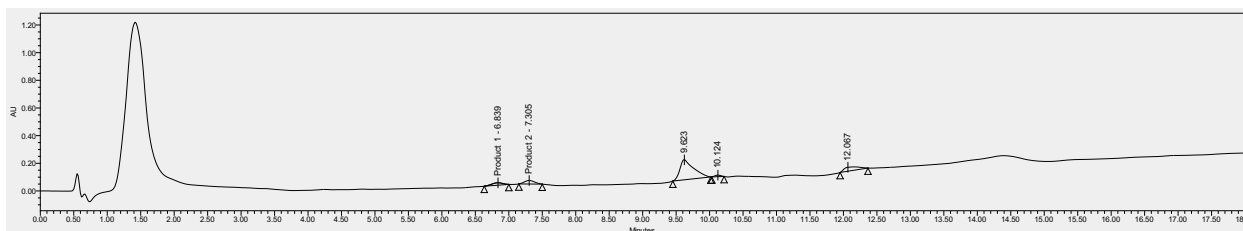

|   | Name      | Retention Time | Area    | % Area |
|---|-----------|----------------|---------|--------|
| 1 | Product 1 | 6.839          | 201422  | 6.62   |
| 2 | Product 2 | 7.305          | 271461  | 8.92   |
| 3 |           | 9.623          | 2072836 | 68.14  |
| 4 |           | 10.124         | 71236   | 2.34   |
| 5 |           | 12.067         | 425052  | 13.97  |

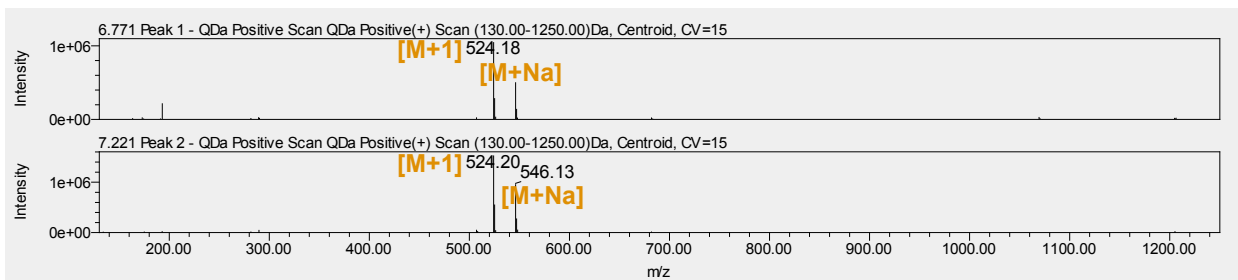

**7:** MW = 524.6 g/mol, Purity = 0%, Yield = 0% [0.0 mg]

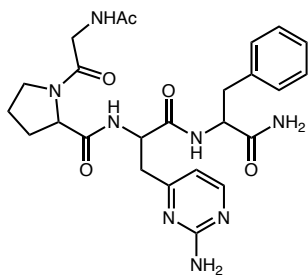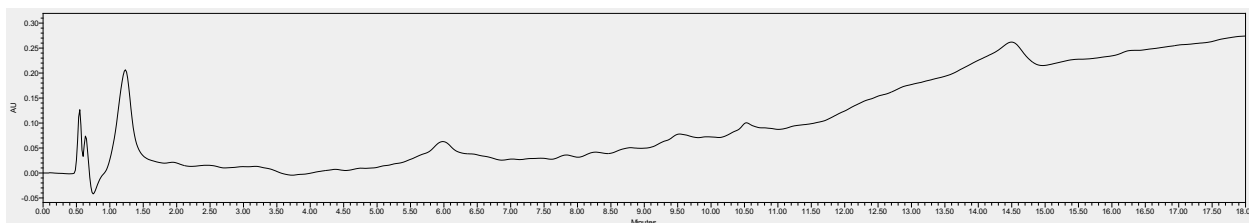

**8:** MW = 549.6 g/mol, Purity = 0%, Yield = 0% [0.0 mg]

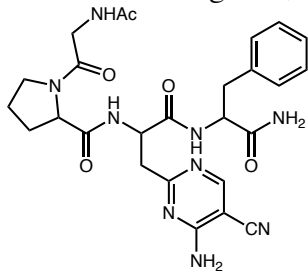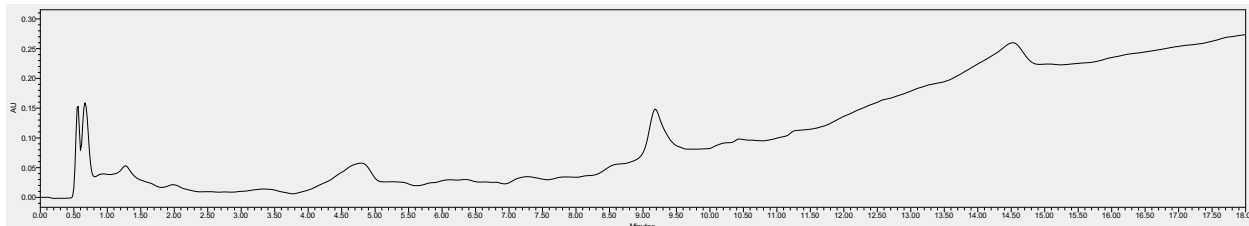

**9:** MW = 525.6 g/mol, Purity = 0%, Yield = 0% [0.0 mg]

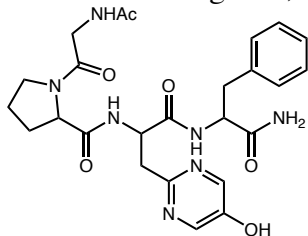

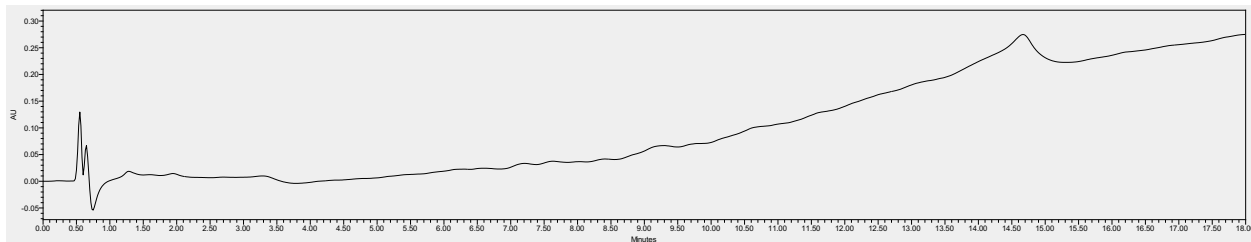

**11:** MW = 549.6 g/mol, Purity = 0%, Yield = 0% [0.0 mg]

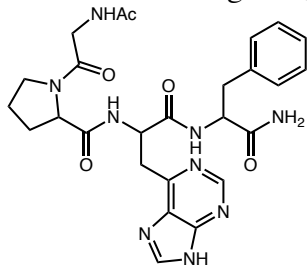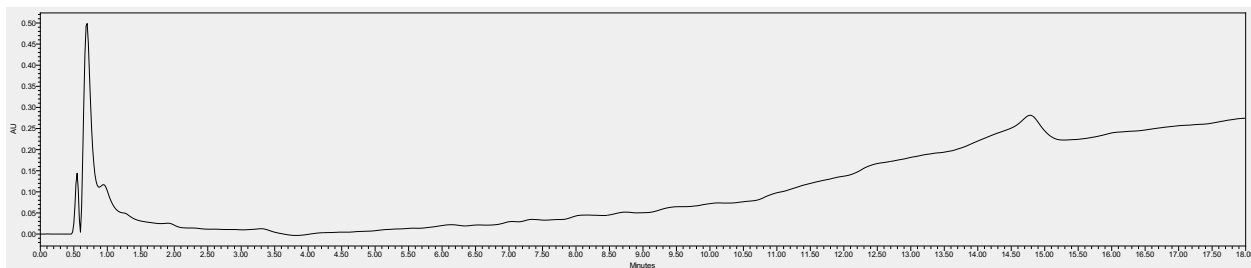

**12:** MW = 564.6 g/mol, Purity = 0%, Yield = 0% [0.0 mg]

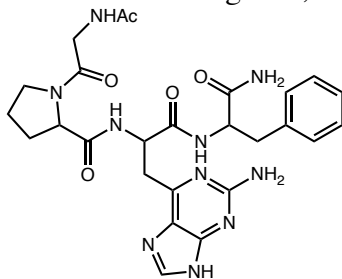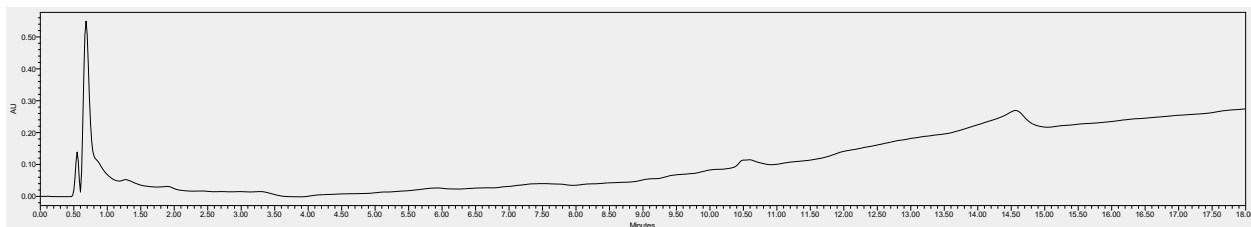

**13:** MW = 548.6 g/mol, Purity = 81.5%, Yield = 71.2% [0.91 mg]

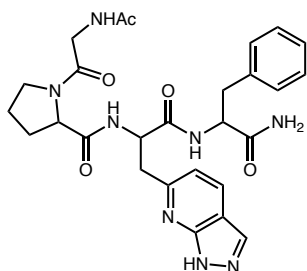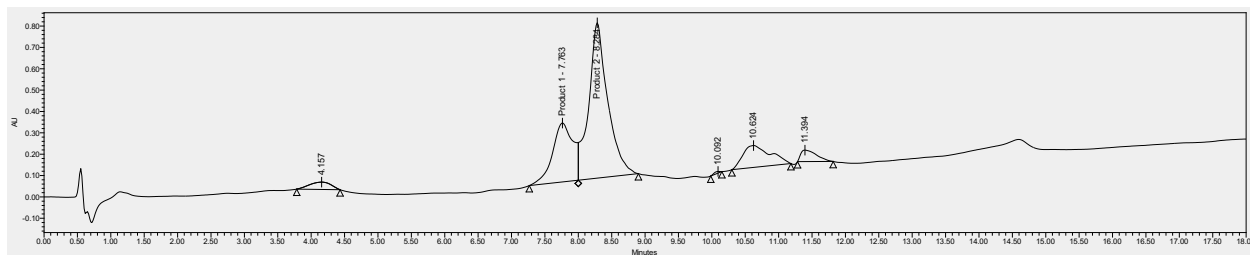

|   | Name      | Retention Time | Area     | % Area |
|---|-----------|----------------|----------|--------|
| 1 |           | 4.157          | 770710   | 3.09   |
| 2 | Product 1 | 7.763          | 5908602  | 23.66  |
| 3 | Product 2 | 8.284          | 14441511 | 57.82  |
| 4 |           | 10.092         | 53465    | 0.21   |
| 5 |           | 10.624         | 2919691  | 11.69  |
| 6 |           | 11.394         | 881515   | 3.53   |

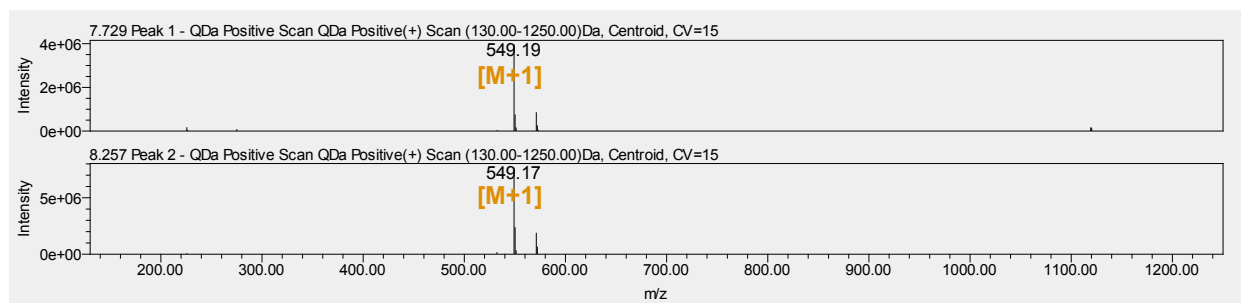

**14:** MW = 548.6 g/mol, Purity = 66.8%, Yield = 19.9% [0.25 mg]

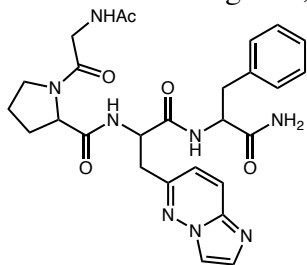

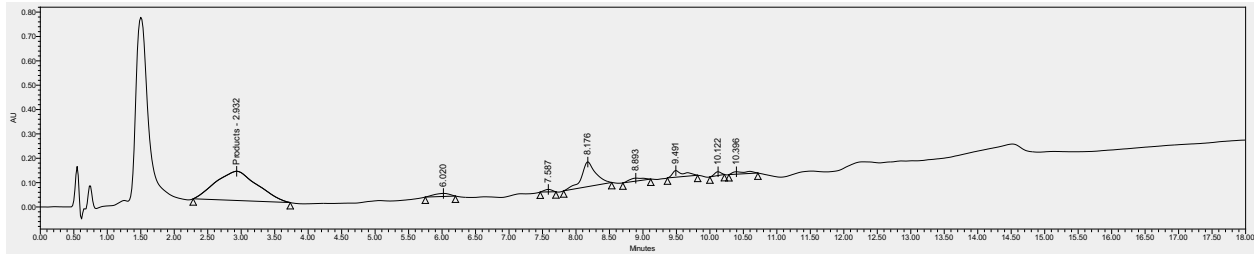

|   | Name     | Retention Time | Area    | % Area |
|---|----------|----------------|---------|--------|
| 1 | Products | 2.932          | 5163237 | 66.79  |
| 2 |          | 6.020          | 204566  | 2.65   |
| 3 |          | 7.587          | 82485   | 1.07   |
| 4 |          | 8.176          | 1501962 | 19.43  |
| 5 |          | 8.893          | 177214  | 2.29   |
| 6 |          | 9.491          | 330069  | 4.27   |
| 7 |          | 10.122         | 104324  | 1.35   |
| 8 |          | 10.396         | 167118  | 2.16   |

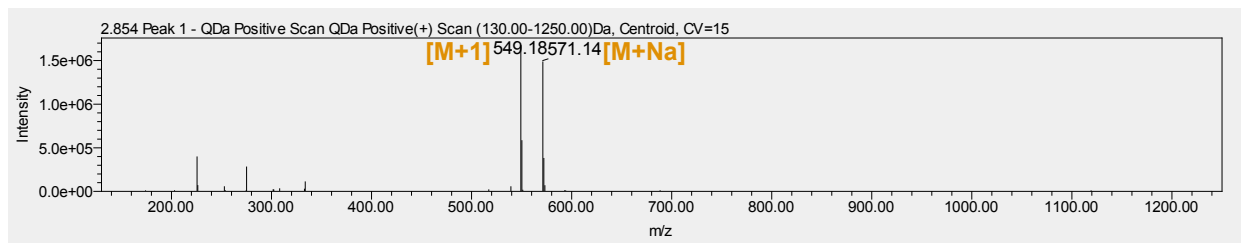

**15:** MW = 548.6 g/mol, Purity = 90.0%, Yield = 17.3% [0.22 mg]

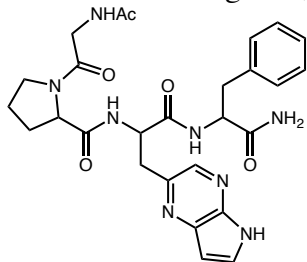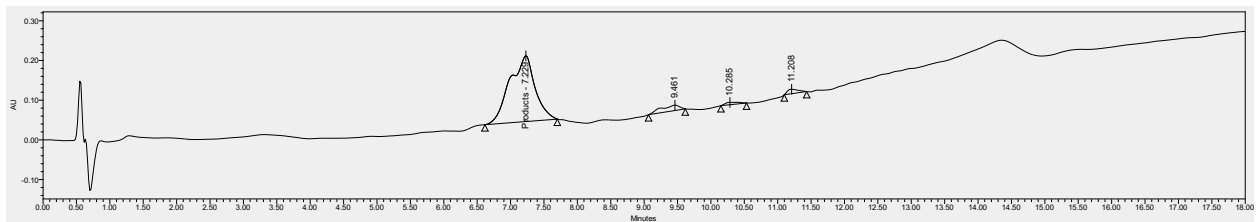

|   | Name     | Retention Time | Area    | % Area |
|---|----------|----------------|---------|--------|
| 1 | Products | 7.229          | 4366749 | 89.97  |
| 2 |          | 9.461          | 280842  | 5.79   |
| 3 |          | 10.285         | 79754   | 1.64   |
| 4 |          | 11.208         | 126384  | 2.60   |

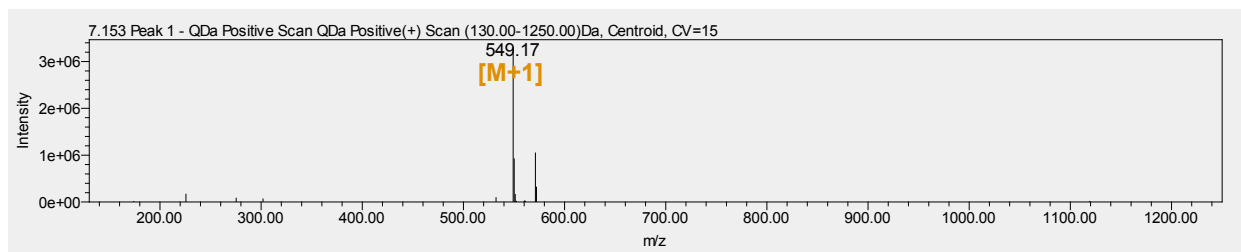

**19:** MW = 549.6 g/mol, Purity = 92.0%, Yield = 4.4% [0.6 mg]

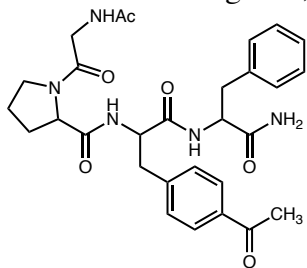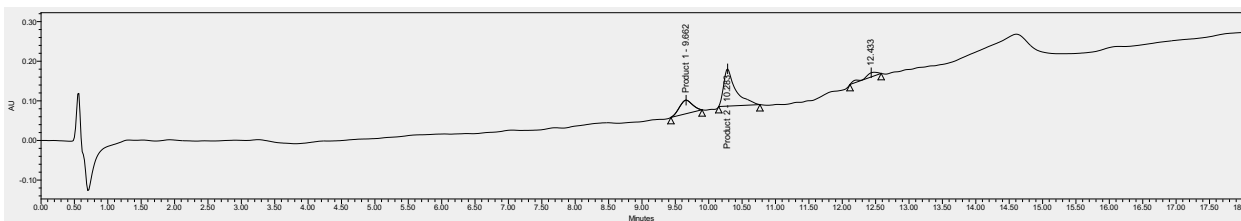

|   | Name      | Retention Time | Area    | % Area |
|---|-----------|----------------|---------|--------|
| 1 | Product 1 | 9.662          | 465141  | 26.06  |
| 2 | Product 2 | 10.283         | 1176728 | 65.92  |
| 3 |           | 12.433         | 143144  | 8.02   |

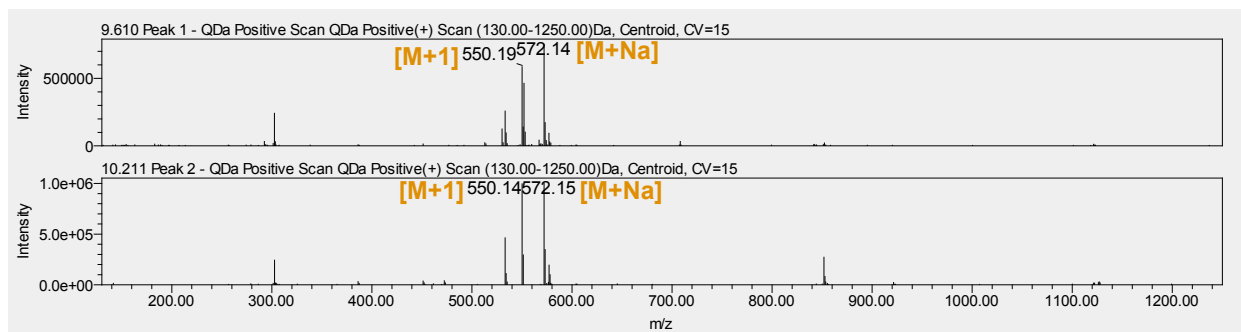

**20:** MW = 535.6 g/mol, Purity = 8.1%, Yield = 1.0% [0.01 mg]

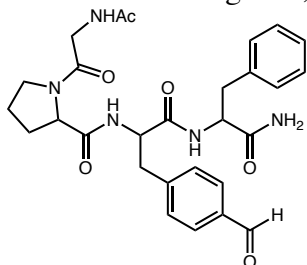

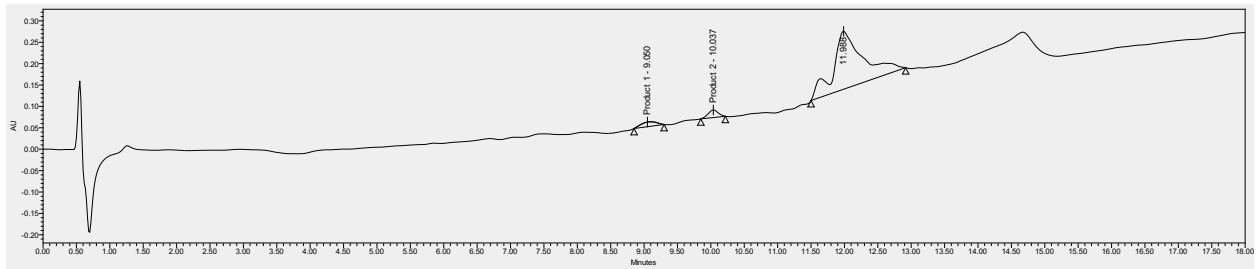

|   | Name      | Retention Time | Area    | % Area |
|---|-----------|----------------|---------|--------|
| 1 | Product 1 | 9.050          | 177589  | 3.94   |
| 2 | Product 2 | 10.037         | 185148  | 4.11   |
| 3 |           | 11.988         | 4139146 | 91.94  |

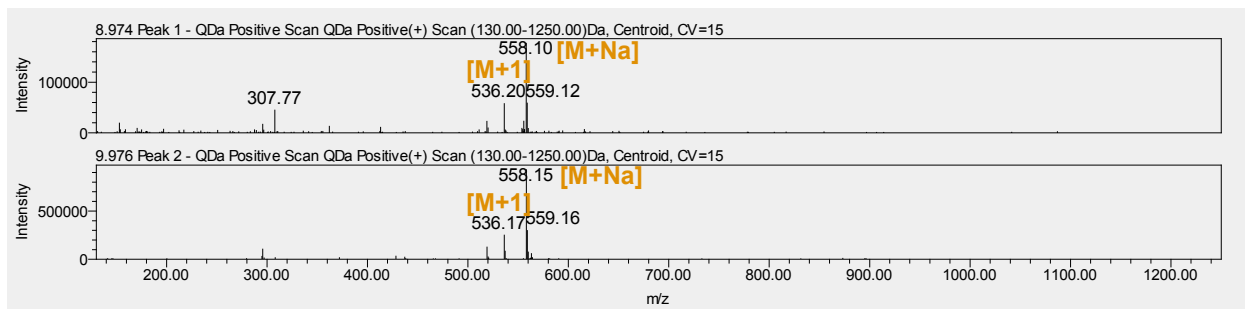

## Flow Synthesis

### Procedure for flow synthesis and results

To a 1-dram vial, Ac-Gly-Pro-Dha-Phe-NH<sub>2</sub> (25 mg, 58 μmol, 1 equiv.), 2-bromopyrimidine (14 mg, 87 μmol, 1.5 equiv.), rhodamine B (140 μg, 0.29 μmol, 0.5 mol%), diisopropylethylamine (15 μL, 87 μmol, 1.5 equiv.), 2,2,2-trifluoroethanol (29 μL), acetonitrile (29 μL), and ddH<sub>2</sub>O (500 μL total, overall concentration 0.1 M, N<sub>2</sub> sparged for 5 minutes) were added. ddH<sub>2</sub>O was purged with N<sub>2</sub> for 5 minutes and was used to rinse the tubing. The vial was then purged under N<sub>2</sub> for 5 minutes and transferred to the tubing using a syringe. The syringe was then refilled with N<sub>2</sub> purged ddH<sub>2</sub>O and hooked up to a syringe pump (New Era Pump Systems Inc.) with a flow rate set to 14 μL/min. The solution was irradiated with the Lumidox® 96-well LED array (527 nm) over 2 hours and 36 minutes (1 hour and 55-minute residence time) and was collected into a 1-dram vial. (Note: Air was left in between the ddH<sub>2</sub>O prior to the reaction solution and the ddH<sub>2</sub>O after the reaction solution. A little extra ddH<sub>2</sub>O was then collected with the reaction solution after completion of the reaction due to some loss of solution on the tubing walls during flow.) The sample was then submitted for UPLC/MS analysis using a Supelco Discovery Bio Wide Pore C8 (3.0 μ, 4.6 mm x 10 cm) column with a 0.5 mL/min flow rate using the method below. (45% conversion). The product was then purified by reverse phase flash chromatography (acetonitrile:H<sub>2</sub>O) to yield 11.1 mg of compound **1** (38% yield).

A = Acetonitrile with 1% formic acid modifier, B = ddH<sub>2</sub>O with 1% formic acid modifier.

| Time: | %A:  | %B:  |
|-------|------|------|
| 0.0   | 5.0  | 95.0 |
| 2.0   | 5.0  | 95.0 |
| 3.0   | 10.0 | 90.0 |
| 9.0   | 30.0 | 70.0 |
| 17.0  | 50.0 | 50.0 |
| 17.5  | 95.0 | 5.0  |
| 18.0  | 95.0 | 5.0  |

### Crude Batch Reaction for Compound **1**:

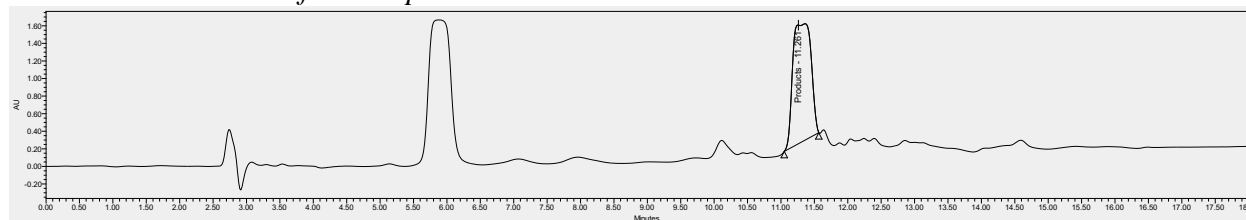

|   | Name     | Retention Time | Area     | % Area |
|---|----------|----------------|----------|--------|
| 1 | Products | 11.261         | 25518563 | 100.00 |



*Crude Flow Reaction for Compound 1:*

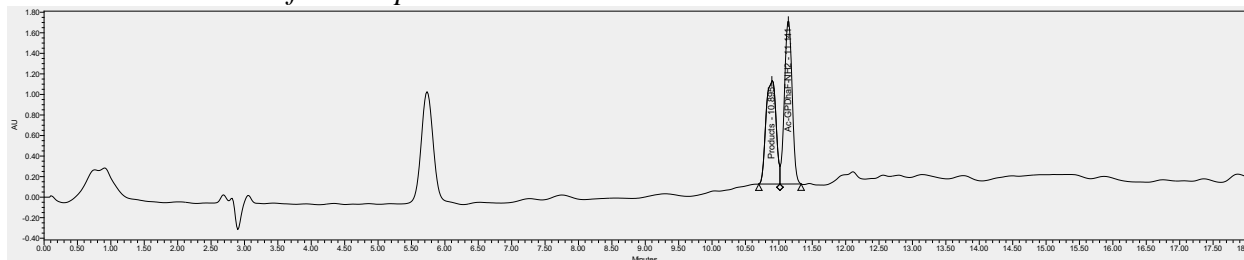

|   | Name          | Retention Time | Area     | % Area |
|---|---------------|----------------|----------|--------|
| 1 | Products      | 10.895         | 10517566 | 45.28  |
| 2 | Ac-GPDhaF-NH2 | 11.141         | 12708612 | 54.72  |

*Isolated Epimers:*

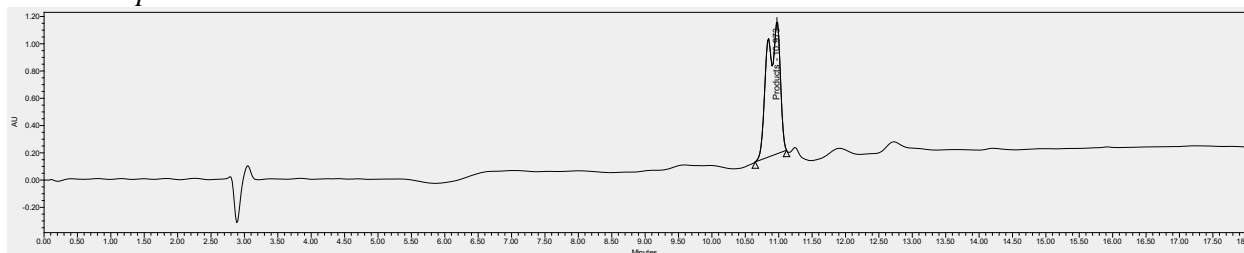

|   | Name     | Retention Time | Area     | % Area |
|---|----------|----------------|----------|--------|
| 1 | Products | 10.973         | 13102767 | 100.00 |

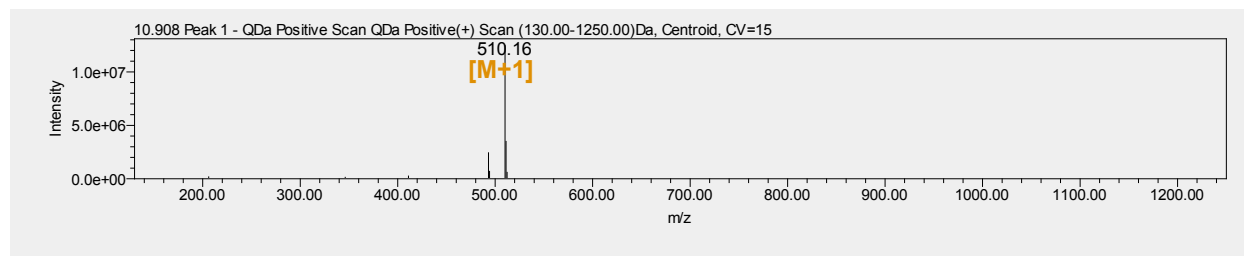

# Mechanistic Studies

## TEMPO radical trapping

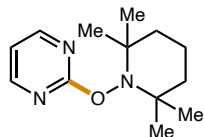

To a 1-dram vial charged with a stir bar, 2-bromopyrimidine (9 mg, 58  $\mu\text{mol}$ , 1 equiv.), TEMPO (9 mg, 58  $\mu\text{mol}$ , 1 equiv.), 200  $\mu\text{L}$  of rhodamine B from a 1.16 mM stock solution in ddH<sub>2</sub>O (111  $\mu\text{g}$ , 0.23  $\mu\text{mol}$ , 0.4 mol%), diisopropylethylamine (3  $\mu\text{L}$ , 17  $\mu\text{mol}$ , 0.3 equiv.), 2,2,2-trifluoroethanol (194  $\mu\text{L}$ ), acetonitrile (194  $\mu\text{L}$ ), and ddH<sub>2</sub>O (3.5 mL total, N<sub>2</sub> sparged for 5 minutes) were added. The vial was purged under N<sub>2</sub> for 5 minutes, parafilm, and placed 1 cm away from two Green LED lights with stirring at 1150 rpm on the Corning PC-620D stir plate (under fan cooling) for fifteen hours. After that time, the sample was filtered and subjected to UPLC/MS analysis to determine % conversion (defined as the % area of the product peak compared to the 2-bromopyrimidine peak at 280 nm). (3% conversion).

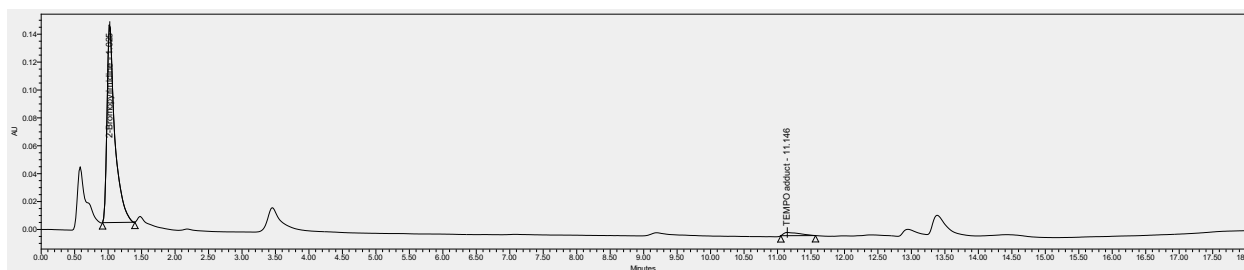

|   | Name              | Retention Time | Area    | % Area |
|---|-------------------|----------------|---------|--------|
| 1 | 2-Bromopyrimidine | 1.025          | 1148340 | 96.73  |
| 2 | TEMPO adduct      | 11.146         | 38795   | 3.27   |

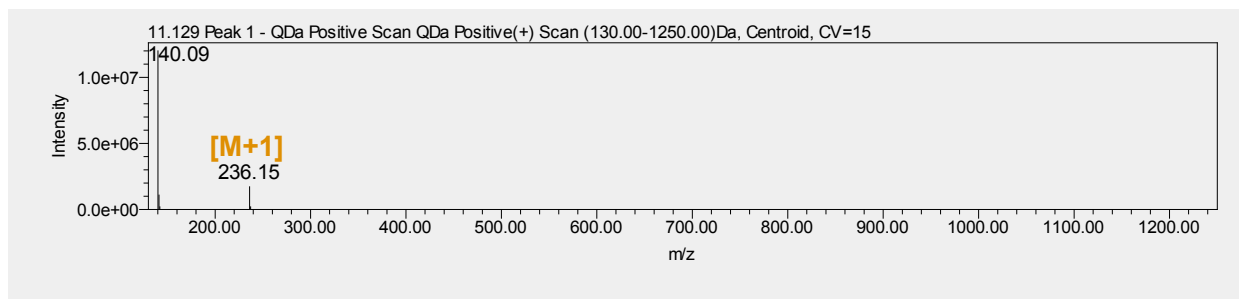

## Isodesmic calculations

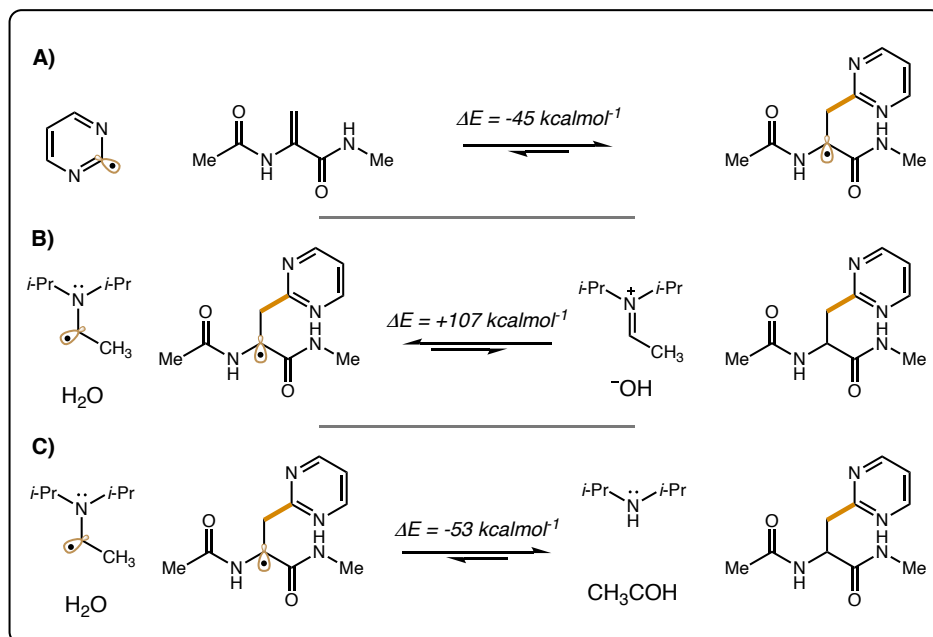

**Figure S4.** Isodesmic calculations for the A) radical addition to Dha, B) the unfavorable intermediate reduction by DIPEA, and C) the overall favorable process to form the cNP product.

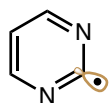

Job type: Single point.

Method: UB3LYP

Basis set: 6-311+G\*\*

Number of basis functions: 150

Number of electrons: 41 (1 unpaired)

Parallel Job: 4 threads

SCF model:

An unrestricted hybrid HF-DFT SCF calculation will be performed using Pulay DIIS + Geometric Direct Minimization

SCF total energy: -263.7110795 hartrees

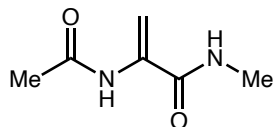

Job type: Single point.

Method: RB3LYP

Basis set: 6-311+G\*\*

Number of basis functions: 280

Number of electrons: 76

Parallel Job: 4 threads

SCF model:

A restricted hybrid HF-DFT SCF calculation will be performed using Pulay DIIS + Geometric Direct Minimization

SCF total energy: -494.7808416 hartrees

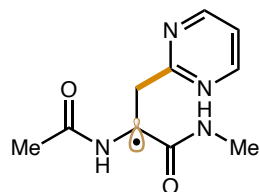

Job type: Single point.

Method: UB3LYP

Basis set: 6-311+G\*\*

Number of basis functions: 430

Number of electrons: 117 (1 unpaired)

Parallel Job: 4 threads

SCF model:

An unrestricted hybrid HF-DFT SCF calculation will be performed using Pulay DIIS + Geometric Direct Minimization

SCF total energy: -758.5640844 hartrees

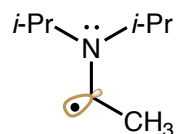

Job type: Single point.

Method: UB3LYP

Basis set: 6-311+G\*\*

Number of basis functions: 306

Number of electrons: 73 (1 unpaired)

Parallel Job: 4 threads

SCF model:

An unrestricted hybrid HF-DFT SCF calculation will be performed using Pulay DIIS + Geometric Direct Minimization

SCF total energy: -370.4927896 hartrees

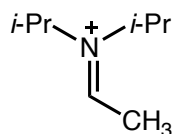

Job type: Single point.  
Method: RB3LYP  
Basis set: 6-311+G\*\*  
Number of basis functions: 306  
Charge: +1  
Number of electrons: 72  
Parallel Job: 2 threads

SCF model:

A restricted hybrid HF-DFT SCF calculation will be performed using Pulay DIIS + Geometric Direct Minimization

SCF total energy: -370.3192909 hartrees

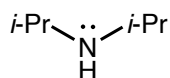

Job type: Single point.  
Method: RB3LYP  
Basis set: 6-311+G\*\*  
Number of basis functions: 244  
Number of electrons: 58  
Parallel Job: 4 threads

SCF model:

A restricted hybrid HF-DFT SCF calculation will be performed using Pulay DIIS + Geometric Direct Minimization

SCF total energy: -292.5129296 hartrees

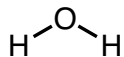

Job type: Single point.  
Method: RB3LYP  
Basis set: 6-311+G\*\*  
Number of basis functions: 34  
Number of electrons: 10  
Parallel Job: 4 threads

SCF model:

A restricted hybrid HF-DFT SCF calculation will be performed using Pulay DIIS + Geometric Direct Minimization

SCF total energy: -76.4584607 hartrees

<sup>-</sup>OH

Job type: Single point.

Method: RB3LYP

Basis set: 6-311+G\*\*

Number of basis functions: 28

Charge: -1

Number of electrons: 10

Parallel Job: 2 threads

SCF model:

A restricted hybrid HF-DFT SCF calculation will be performed using Pulay DIIS + Geometric Direct Minimization

SCF total energy: -75.8273302 hartrees

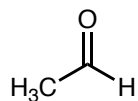

Job type: Single point.

Method: RB3LYP

Basis set: 6-311+G\*\*

Number of basis functions: 90

Number of electrons: 24

Parallel Job: 4 threads

SCF model:

A restricted hybrid HF-DFT SCF calculation will be performed using Pulay DIIS + Geometric Direct Minimization

SCF total energy: -153.8821290 hartrees

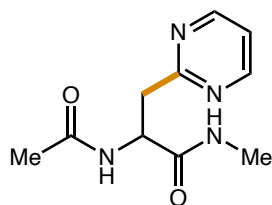

Job type: Single point.

Method: RB3LYP

Basis set: 6-311+G\*\*

Number of basis functions: 436

Number of electrons: 118

Parallel Job: 4 threads

SCF model:

A restricted hybrid HF-DFT SCF calculation will be performed using Pulay DIIS + Geometric Direct Minimization

SCF total energy: -759.2045780 hartrees

### HRMS of crude reaction

Protonated DIPEA Base calculated  $[C_8H_{20}N]^+ = 130.16$

Protonated Diisopropylamine calculated  $[C_6H_{16}N]^+ = 102.13$

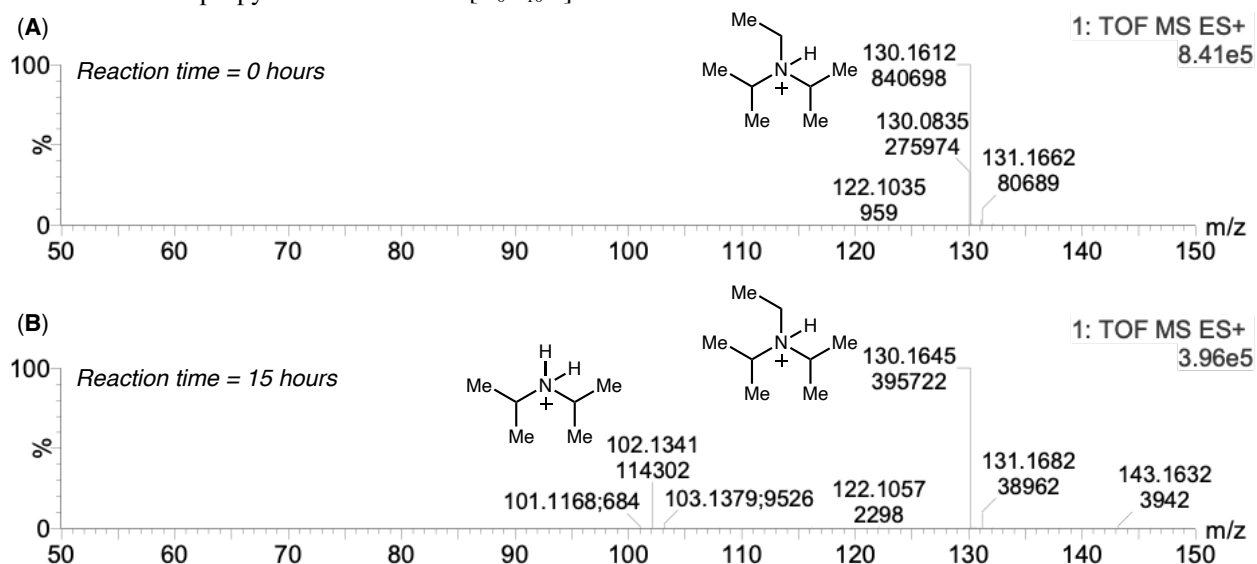

**Figure S5.** A) HRMS of the reaction with 2-bromopyrimidine before Green LED irradiation. B) HRMS of the reaction with 2-bromopyrimidine after 15 hours of Green LED irradiation.

### Deuterium labeling experiment

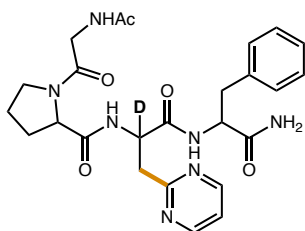

The reaction was set up according to the general procedure for pyrimidine sidechains with the exception of exchanging all ddH<sub>2</sub>O for D<sub>2</sub>O. After 15 hours, the crude reaction was then submitted to UPLC/MS analysis. >95% deuterium incorporation was observed.

Crude

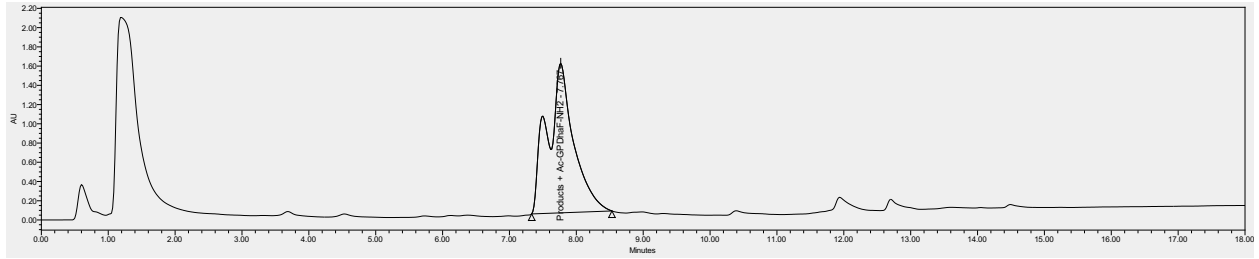

|   | Name                     | Retention Time | Area     | % Area |
|---|--------------------------|----------------|----------|--------|
| 1 | Products + Ac-GPDhaF-NH2 | 7.767          | 42320533 | 100.00 |

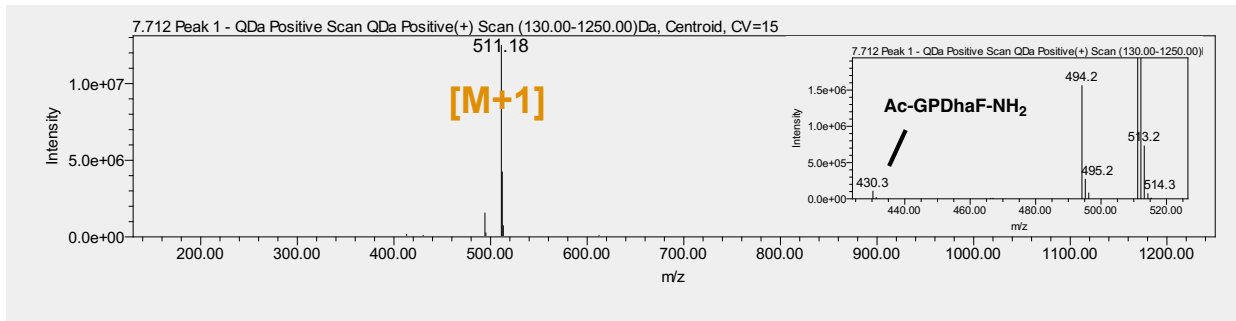



## Analytical Data of Products

### NMR shifts

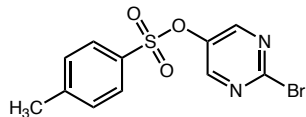

#### 2-bromopyrimidin-5-yl 4-methylbenzenesulfonate

Isolated Yield 61% (220 mg).  $^1\text{H NMR}$  (400 MHz, Chloroform-*d*)  $\delta$  8.24 (s, 2H), 7.80 – 7.62 (m, 2H), 7.45 – 7.32 (m, 2H), 2.48 (s, 3H).  $^{13}\text{C NMR}$  (101 MHz, Chloroform-*d*)  $\delta$  153.55, 149.94, 147.14, 144.79, 130.58, 128.74, 21.96. **HRMS (ESI-ToF)**  $m/z$  calculated for  $\text{C}_{11}\text{H}_{10}\text{BrN}_2\text{O}_3\text{S}$   $[\text{MH}]^+$ : 328.9596. Found 328.9593.

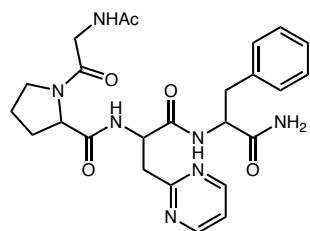

#### Compound 1

$^1\text{H NMR}$  (400 MHz,  $\text{CD}_3\text{CN}$ )  $\delta$  8.62 (d,  $J = 4.9$  Hz, 2H), 7.96 – 7.31 (m, 2H), 7.28 – 7.10 (m, 6H), 6.99 – 6.68 (m, 2H), 6.00 (m, 1H), 4.77 – 4.58 (m, 1H), 4.51 – 4.30 (m, 1H), 4.20 (m, 1H), 4.05 – 3.82 (m, 2H), 3.67 – 3.42 (m, 2H), 3.44 – 3.29 (m, 1H), 3.28 – 3.09 (m, 2H), 3.03 – 2.78 (m, 1H), 2.19 – 1.65 (m, 4H), 1.84 – 1.81 (- $\text{NHCOCH}_3$  two s, 3H).

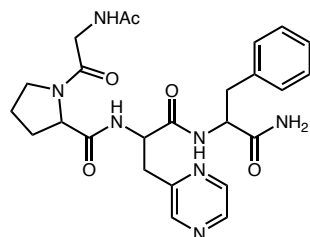

#### Compound 2

$^1\text{H NMR}$  (400 MHz,  $\text{CD}_3\text{CN}$ )  $\delta$  8.51 – 8.32 (m, 3H), 7.69 – 7.38 (m, 2H), 7.36 – 7.12 (m, 5H), 7.02 – 6.63 (m, 2H), 5.87 (m, 1H), 4.61 – 4.46 (m, 1H), 4.41 (ddt,  $J = 9.6, 8.5, 4.8$  Hz, 1H), 4.23 – 4.09 (m, 1H), 4.06 – 3.78 (m, 2H), 3.66 – 3.41 (m, 2H), 3.33 – 3.00 (m, 3H), 2.89 (m, 1H), 2.14 – 1.63 (m, 4H), 1.86 – 1.81 (- $\text{NHCOCH}_3$  two s, 3H).

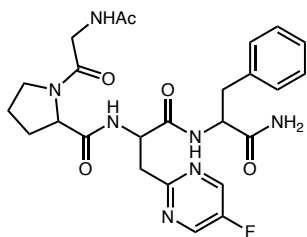

### Compound 3

**<sup>1</sup>H NMR** (400 MHz, CD<sub>3</sub>CN) δ 8.55 (dd, *J* = 5.1, 0.9 Hz, 2H), 7.31 – 7.14 (m, 5H), 4.68 (ddd, *J* = 7.7, 6.7, 5.1 Hz, 1H), 4.41 (ddd, *J* = 9.6, 4.9, 2.5 Hz, 1H), 4.30 – 4.11 (m, 1H), 4.10 – 3.77 (m, 2H), 3.68 – 3.41 (m, 2H), 3.32 (m, 1H), 3.24 – 3.13 (m, 2H), 2.89 (ddd, *J* = 14.2, 9.8, 4.5 Hz, 1H), 2.16 – 1.68 (m, 4H), 1.86 – 1.81 (-NHCOCH<sub>3</sub> two s, 3H). **<sup>19</sup>F NMR** (376 MHz, CD<sub>3</sub>CN) δ -142.02, -142.55.

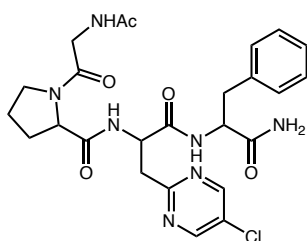

### Compound 4

**<sup>1</sup>H NMR** (400 MHz, CD<sub>3</sub>CN) δ 8.63 (d, *J* = 8.1 Hz, 2H), 7.21 (dtd, *J* = 15.7, 6.7, 2.1 Hz, 5H), 4.74 – 4.67 (m, 1H), 4.46 – 4.39 (m, 1H), 4.24 – 4.14 (m, 1H), 4.06 – 3.80 (m, 2H), 3.62 – 3.44 (m, 2H), 3.37 – 3.12 (m, 4H), 2.14 – 1.69 (m, 4H), 1.86 – 1.82 (-NHCOCH<sub>3</sub> two s, 3H).

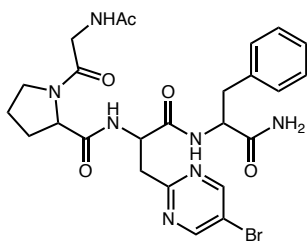

### Compound 5

**<sup>1</sup>H NMR** (400 MHz, CD<sub>3</sub>CN) δ 8.71 (d, *J* = 8.3 Hz, 2H), 7.31 – 7.13 (m, 5H), 4.74 – 4.68 (m, 1H), 4.45 – 4.39 (m, 1H), 4.19 (ddd, *J* = 14.1, 12.4, 5.5 Hz, 1H), 4.05 – 3.80 (m, 2H), 3.63 – 3.43 (m, 2H), 3.33 – 3.10 (m, 3H), 2.85 (m, 1H), 2.14 – 1.68 (m, 4H), 1.87 – 1.82 (-NHCOCH<sub>3</sub> two s, 3H).

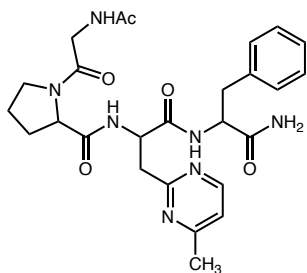

### Compound 6

$^1\text{H NMR}$  (400 MHz,  $\text{CD}_3\text{CN}$ )  $\delta$  8.45 (dd,  $J = 10.0, 5.2$  Hz, 1H), 7.91 – 7.44 (m, 2H), 7.30 – 7.15 (m, 5H), 7.11 (dd,  $J = 7.9, 5.2$  Hz, 1H), 7.07 – 6.74 (m, 2H), 6.04 (d,  $J = 23.2$  Hz, 1H), 4.66 (dddd,  $J = 8.6, 7.3, 5.0, 2.7$  Hz, 1H), 4.41 (dddd,  $J = 9.6, 8.5, 7.5, 4.8$  Hz, 1H), 4.26 – 4.16 (m, 1H), 4.06 – 3.81 (m, 2H), 3.67 – 3.46 (m, 2H), 3.31 – 3.05 (m, 3H), 2.89 (ddd,  $J = 14.0, 9.7, 4.3$  Hz, 1H), 2.42 – 2.41 (s, 3H), 2.16 – 1.68 (m, 4H), 1.85 – 1.81 (- $\text{NHCOCH}_3$  two s, 3H).

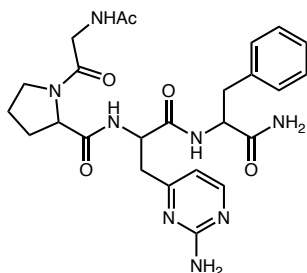

### Compound 7

$^1\text{H NMR}$  (400 MHz,  $\text{CD}_3\text{CN}$ )  $\delta$  8.09 (t,  $J = 4.4$  Hz, 1H), 7.77 (dd,  $J = 121.5, 8.4$  Hz, 1H), 7.47 (dd,  $J = 21.4, 7.8$  Hz, 1H), 7.30 – 7.14 (m, 6H), 6.97 – 6.63 (m, 2H), 6.42 (t,  $J = 5.4$  Hz, 1H), 5.73 (dd,  $J = 133.9, 36.3$  Hz, 2H), 4.56 – 4.35 (m, 2H), 4.30 – 4.12 (m, 1H), 3.97 – 3.73 (m, 2H), 3.67 – 3.42 (m, 2H), 3.29 – 2.72 (m, 4H), 2.06 – 1.71 (m, 4H), 1.86 – 1.83 (- $\text{NHCOCH}_3$  two s, 3H).

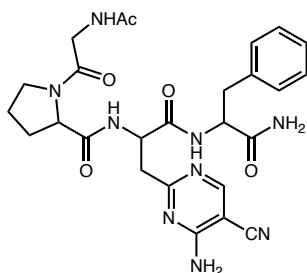

### Compound 8

$^1\text{H NMR}$  (400 MHz,  $\text{CD}_3\text{CN}$ )  $\delta$  8.42 – 8.29 (m, 1H), 7.30 – 7.10 (m, 5H), 4.74 – 4.62 (m, 1H), 4.49 – 4.39 (m, 1H), 4.28 – 4.20 (m, 1H), 4.17 – 3.79 (m, 2H), 3.63 – 3.39 (m, 2H), 3.10 – 3.06 (m, 2H), 2.98 – 2.80 (m, 2H), 2.13 – 1.68 (m, 4H), 1.85 (- $\text{NHCOCH}_3$  two s, 3H).

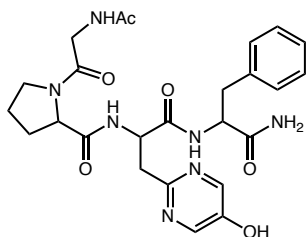

### Compound 9

$^1\text{H NMR}$  (400 MHz,  $\text{CD}_3\text{CN}$ )  $\delta$  8.17 (s, 2H), 7.32 – 7.11 (m, 5H), 4.63 – 4.57 (m, 1H), 4.46 – 4.35 (m, 1H), 4.29 – 4.17 (m, 1H), 4.04 – 3.82 (m, 2H), 3.67 – 3.42 (m, 2H), 3.21 – 3.06 (m, 4H), 2.15 – 1.69 (m, 4H), 1.87 – 1.82 (- $\text{NHCOCH}_3$  two s, 3H).

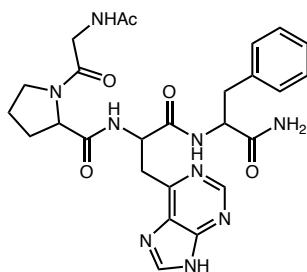

### Compound 11

$^1\text{H NMR}$  (400 MHz,  $\text{CD}_3\text{CN}$ )  $\delta$  8.74 (t,  $J = 6.4$  Hz, 1H), 8.32 (d,  $J = 15.2$  Hz, 1H), 7.25 – 7.11 (m, 5H), 4.79 (t,  $J = 4.5$  Hz, 1H), 4.46 – 4.37 (m, 1H), 4.21 – 4.13 (m, 1H), 4.03 – 3.79 (m, 2H), 3.65 – 3.40 (m, 4H), 3.20 – 3.11 (m, 1H), 2.92 – 2.82 (m, 1H), 2.13 – 1.54 (m, 4H), 1.87 – 1.81 (- $\text{NHCOCH}_3$  two s, 3H).

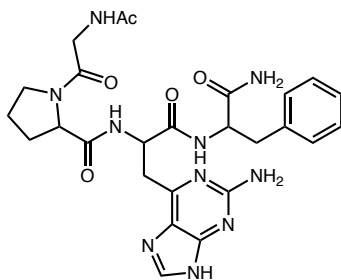

### Compound 12

$^1\text{H NMR}$  (400 MHz,  $\text{CD}_3\text{CN}$ )  $\delta$  7.93 (d,  $J = 19.7$  Hz, 1H), 7.27 – 7.11 (m, 5H), 4.77 – 4.68 (m, 1H), 4.44 (ddd,  $J = 14.9, 9.2, 5.4$  Hz, 1H), 4.21 (ddt,  $J = 13.0, 8.8, 4.9$  Hz, 1H), 4.00 – 3.81 (m, 2H), 3.62 – 3.41 (m, 2H), 3.36 – 3.09 (m, 4H), 2.07 – 1.52 (m, 4H), 1.87 – 1.82 (- $\text{NHCOCH}_3$  two s, 3H).

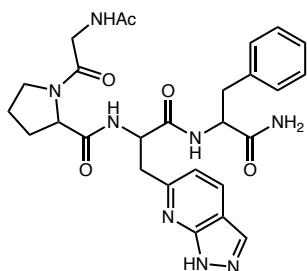

### Compound 13

$^1\text{H NMR}$  (400 MHz,  $\text{CD}_3\text{CN}$ )  $\delta$  8.08 – 7.95 (m, 2H), 7.80 – 7.58 (m, 1H), 7.52 – 7.31 (m, 1H), 7.30 – 7.15 (m, 5H), 7.15 – 6.93 (m, 2H), 6.84 – 6.65 (m, 2H), 5.97 – 5.66 (m, 1H), 4.71 – 4.49 (m, 1H), 4.48 – 4.29 (m, 1H), 4.25 – 4.15 (m, 1H), 4.05 – 3.76 (m, 2H), 3.66 – 3.42 (m, 2H), 3.41 – 3.11 (m, 2H), 3.10 – 2.81 (m, 2H), 2.02 – 1.66 (m, 4H), 1.89 – 1.81 (- $\text{NHCOCH}_3$  two s, 3H).

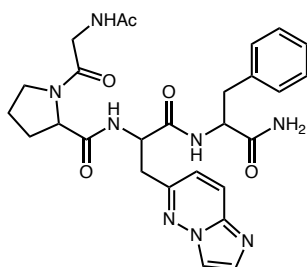

### Compound 14

$^1\text{H NMR}$  (400 MHz,  $\text{CD}_3\text{CN}$ )  $\delta$  7.94 (m, 1H), 7.81 (d,  $J = 9.4$  Hz, 1H), 7.68 – 7.57 (m, 3H), 7.48 (dd,  $J = 26.9, 8.0$  Hz, 1H), 7.30 – 7.16 (m, 5H), 6.98 (dd,  $J = 9.4, 2.5$  Hz, 1H), 6.88 – 6.76 (m, 1H), 5.86 (d,  $J = 24.7$  Hz, 1H), 4.50 – 4.39 (m, 2H), 4.22 – 4.15 (m, 1H), 4.15 – 3.78 (m, 2H), 3.65 – 3.41 (m, 2H), 3.37 – 3.29 (m, 1H), 3.25 – 3.04 (m, 2H), 2.98 – 2.84 (m, 1H), 2.09 – 1.60 (m, 4H), 1.84 (- $\text{NHCOCH}_3$  two s, 3H).

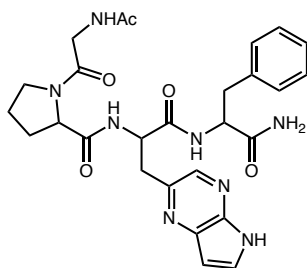

### Compound 15

$^1\text{H NMR}$  (400 MHz,  $\text{CD}_3\text{CN}$ )  $\delta$  8.01 (d,  $J = 3.3$  Hz, 1H), 7.68 (dd,  $J = 7.6, 3.7$  Hz, 1H), 7.24 – 7.14 (m, 5H), 6.55 (dd,  $J = 6.4, 3.6$  Hz, 1H), 4.52 (ddd,  $J = 16.8, 8.7, 4.8$  Hz, 1H), 4.41 (ddd,  $J = 9.8, 4.7, 2.2$  Hz, 1H), 4.23 – 4.14 (m, 1H), 4.12 – 3.81 (m, 2H), 3.68 – 3.40 (m, 2H), 3.34 – 3.05 (m, 3H), 2.88 (ddd,  $J = 13.5, 9.7, 2.7$  Hz, 1H), 2.12 – 1.60 (m, 4H), 1.85 – 1.81 (- $\text{NHCOCH}_3$  two s, 3H).

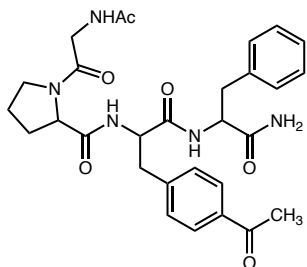

### Compound 19

$^1\text{H NMR}$  (400 MHz,  $\text{CD}_3\text{CN}$ )  $\delta$  7.83 (m, 2H), 7.34 – 7.16 (m, 7H), 4.47 – 4.41 (m, 1H), 4.37 (dd,  $J = 10.1, 4.9$  Hz, 1H), 4.22 – 4.11 (m, 1H), 4.03 – 3.75 (m, 2H), 3.63 – 3.38 (m, 2H), 3.28 – 3.03 (m, 2H), 2.94 – 2.85 (m, 2H), 2.53 (s, 3H), 2.06 – 1.74 (m, 4H), 1.89 – 1.83 (-NHCOCH<sub>3</sub> two s, 3H).

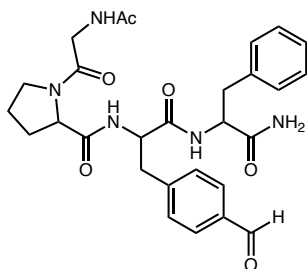

### Compound 20

$^1\text{H NMR}$  (400 MHz,  $\text{CD}_3\text{CN}$ )  $\delta$  9.95 (s, 1H), 7.78 (d,  $J = 7.9$  Hz, 2H), 7.56 – 7.40 (m, 2H), 7.39 – 7.17 (m, 7H), 7.06 – 6.57 (m, 2H), 5.82 (d,  $J = 31.6$  Hz, 1H), 4.46 – 4.36 (m, 1H), 4.25 (ddd,  $J = 10.3, 8.1, 4.7$  Hz, 1H), 4.14 (dd,  $J = 8.2, 5.0$  Hz, 1H), 4.05 – 3.78 (m, 2H), 3.65 – 3.39 (m, 2H), 3.31 – 3.07 (m, 2H), 3.06 – 2.84 (m, 2H), 2.05 – 1.63 (m, 4H), 1.88 – 1.81 (-NHCOCH<sub>3</sub> two s, 3H).

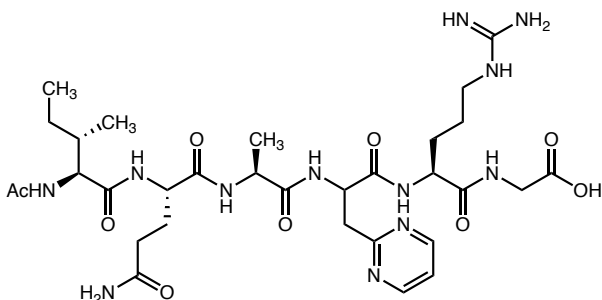

### Compound 21

$^1\text{H NMR}$  (500 MHz, MeOD)  $\delta$  8.74 (dd,  $J = 5.1, 2.8$  Hz, 2H), 7.46 – 7.42 (m, 1H), 4.99 (dd,  $J = 8.5, 5.4$  Hz, 1H), 4.94 – 4.89 (m, 1H), 4.44 – 4.35 (m, 1H), 4.31 (dt,  $J = 9.3, 5.0$  Hz, 1H), 4.24 (dt,  $J = 11.3, 7.1$  Hz, 1H), 4.19 – 4.08 (m, 2H), 3.75 (d,  $J = 10.5$  Hz, 2H), 3.57 – 3.33 (m, 2H), 3.23 – 3.15 (m, 2H), 2.33 (q,  $J = 7.3$  Hz, 2H), 2.02 (d,  $J = 2.9$  Hz, 3H), 2.14 – 1.87 (m, 2H), 1.85 – 1.69 (m, 2H), 1.68 – 1.44 (m, 2H), 1.40 – 1.15 (m, 4H), 0.89 (dt,  $J = 12.2, 7.3$  Hz, 6H).

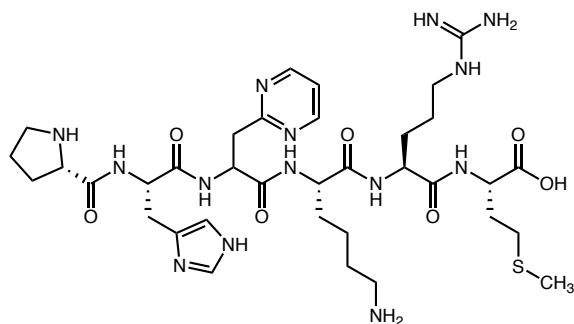

### Compound 22

$^1\text{H NMR}$  (500 MHz, MeOD)  $\delta$  8.74 (m, 2H), 7.92 – 7.77 (m, 1H), 7.43 (t,  $J = 5.0$  Hz, 1H), 7.06 – 6.92 (m, 1H), 4.97 (dd,  $J = 8.0, 5.7$  Hz, 1H), 4.91 (dd,  $J = 8.3, 5.6$  Hz, 1H), 4.59 (dd,  $J = 8.4, 5.5$  Hz, 1H), 4.53 (dd,  $J = 8.2, 6.6$  Hz, 1H), 4.40 – 4.31 (m, 1H), 4.30 – 4.21 (m, 1H), 3.50 – 3.41 (m, 2H), 3.40 – 3.33 (m, 2H), 3.23 – 3.16 (m, 2H), 3.14 – 3.01 (m, 2H), 3.00 – 2.93 (m, 2H), 2.53 – 2.41 (m, 6H), 2.15 – 2.06 (m, 4H), 2.08 (d,  $J = 2.8$  Hz, 3H), 2.00 – 1.85 (m, 4H), 1.73 – 1.64 (m, 4H).

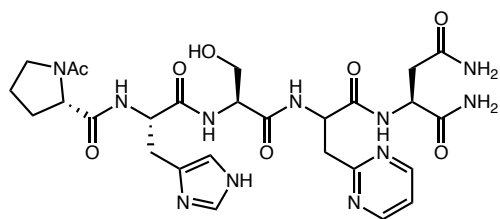

### Compound 23

$^1\text{H NMR}$  (500 MHz, MeOD)  $\delta$  8.75 – 8.69 (m, 2H), 7.61 (m, 1H), 7.36 (m, 1H), 6.91 (m, 1H), 4.99 – 4.96 (m, 1H), 4.70 – 4.66 (m, 1H), 4.57 – 4.51 (m, 1H), 4.36 – 4.31 (m, 1H), 4.30 – 4.25 (m, 1H), 3.86 – 3.77 (m, 1H), 3.76 – 3.64 (m, 2H), 3.63 – 3.55 (m, 1H), 3.54 – 3.39 (m, 2H), 3.19 – 2.98 (m, 2H), 2.80 – 2.63 (m, 2H), 2.23 – 2.15 (m, 1H), 2.15 – 2.10 (-NCOCH<sub>3</sub> two s, 3H), 2.00 – 1.83 (m, 3H).

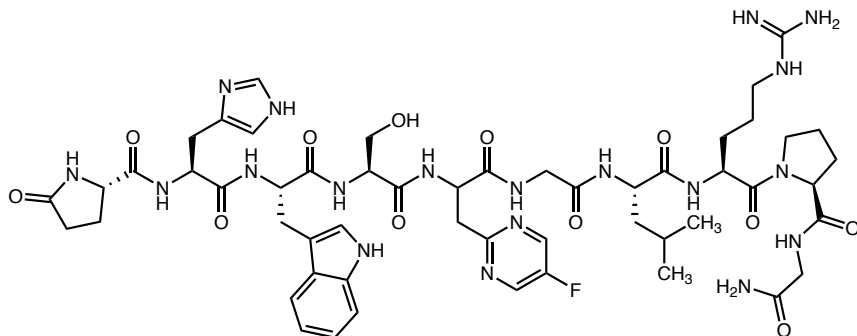

### Compound 24

$^1\text{H NMR}$  (500 MHz, MeOD)  $\delta$  8.64 (d,  $J = 2.4$  Hz, 2H), 7.53 – 7.33 (m, 4H), 7.13 (m, 1H), 7.07 – 6.99 (m, 1H), 6.90 (d,  $J = 26.8$  Hz, 1H), 4.92 – 4.87 (m, 2H), 4.59 – 4.55 (m, 1H), 4.54 – 4.48 (m, 1H), 4.41 – 4.32 (m, 2H), 4.28 – 4.13 (m, 2H), 3.98 – 3.82 (m, 4H), 3.81 – 3.71 (m, 3H), 3.70 – 3.37 (m, 5H), 3.25 – 3.11 (m, 4H), 2.38 – 2.17 (m, 3H), 2.20 (s, 6H), 1.94 – 1.88 (m, 2H), 1.68 – 1.58 (m, 4H), 0.95 – 0.83 (m, 6H).  $^{19}\text{F NMR}$  (376 MHz, MeOD)  $\delta$  -140.64, -140.71.

# NMR Small Molecule Spectrum

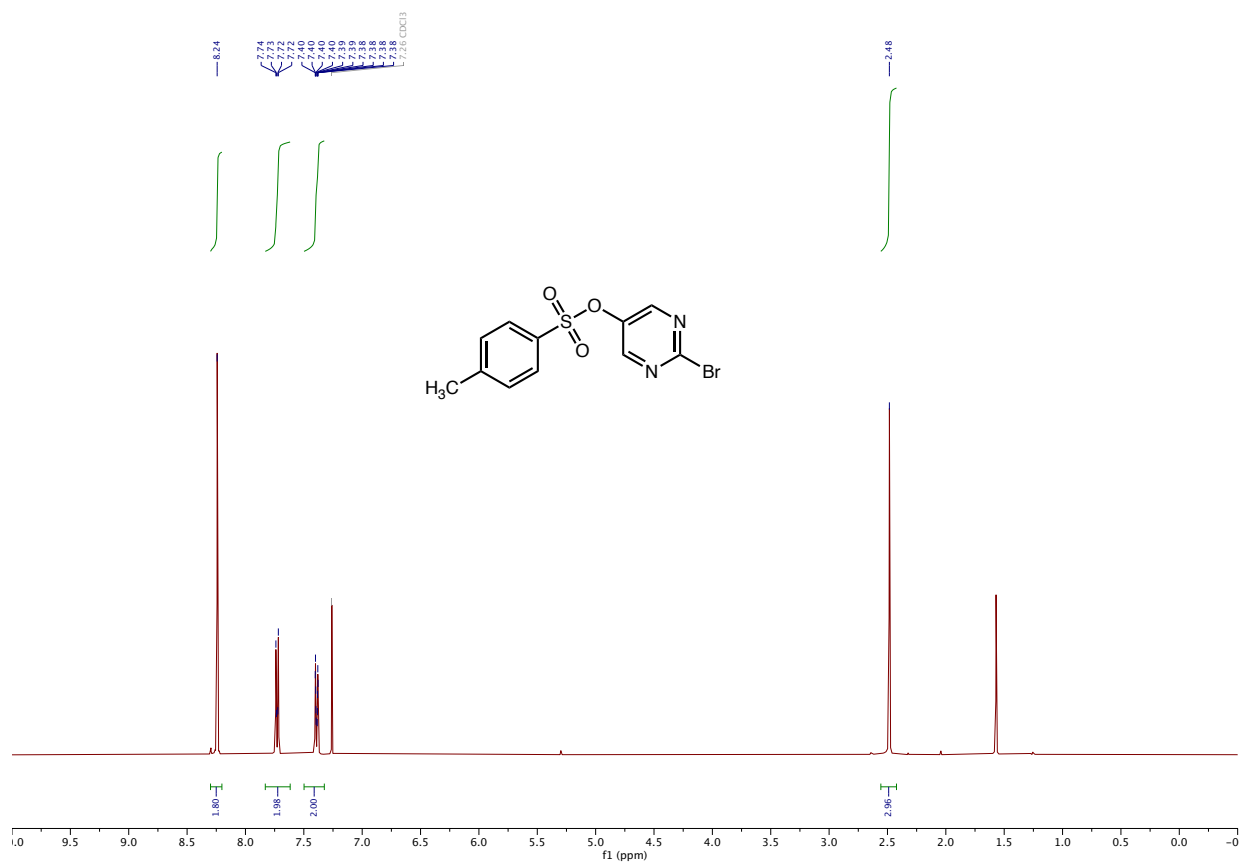



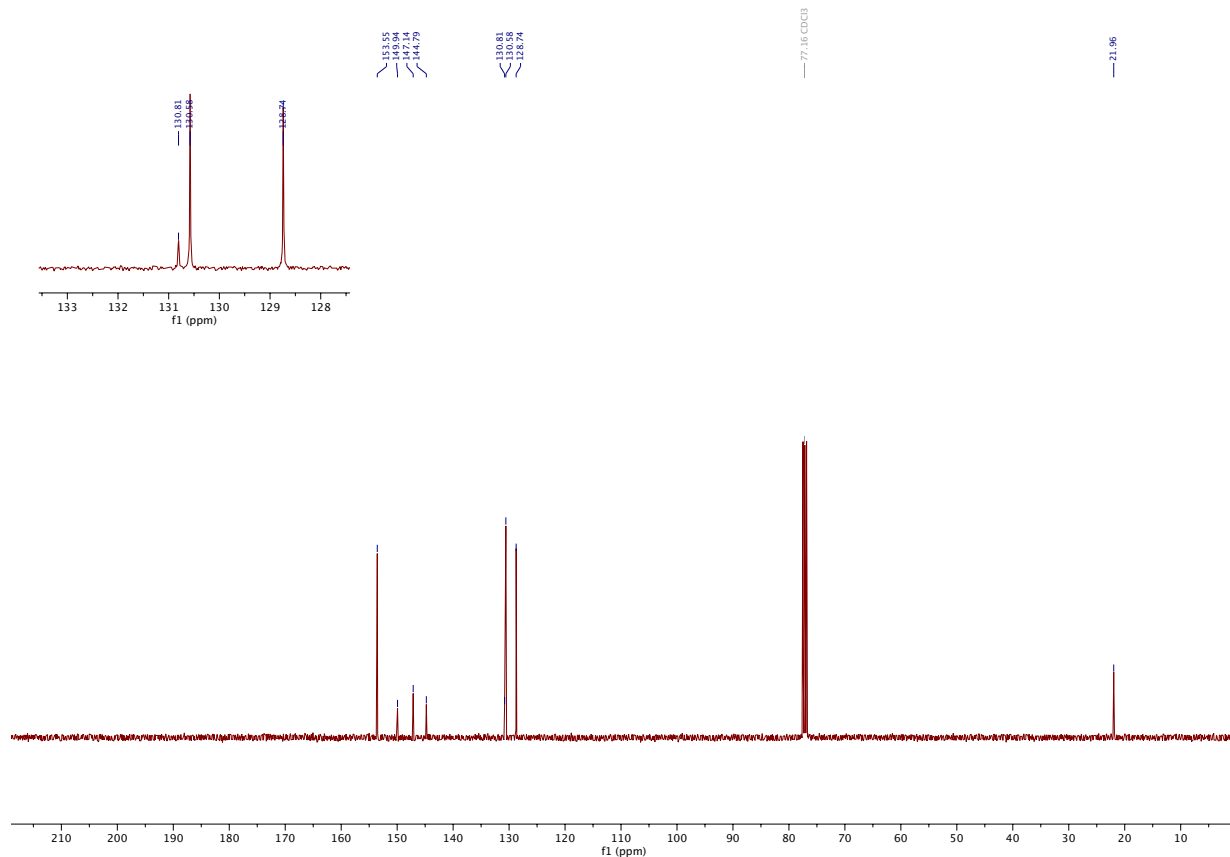

Determining the chemoselectivity of compound **5**

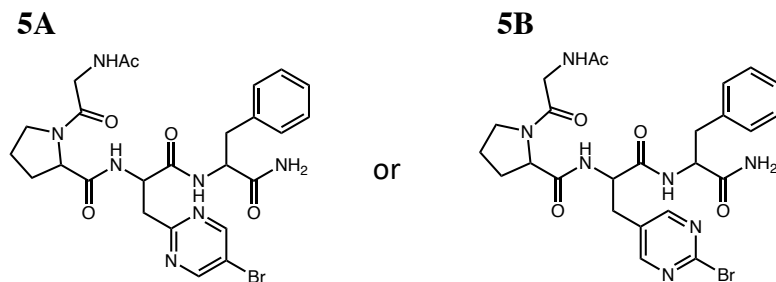

To assess whether the diastereomers of *c*NP **5A** or **5B** were the major products in this reaction, the purified mixture of **5** was dissolved in CD<sub>3</sub>CN and subjected to <sup>1</sup>H NMR analysis. Two sets of diastereomeric protons were observed in the 8 ppm to 9 ppm region that seemed to correlate with the pyrimidine C-Hs. The major products appeared to belong to **5A** due to the greater downfield shift expected in **5A** than **5B** because of the ortho bromine atom present. To validate that the peaks at 8.7 ppm belong to **5A**, the purified mixture was subjected to High Performance Liquid Chromatography (HPLC) purification using a Alltech Econosil C18 (10 μ, 4.6 x 250 mm) HPLC column with acetonitrile:H<sub>2</sub>O. The two major diastereomers were isolated and subjected to UPLC/MS analysis to determine purity and <sup>1</sup>H NMR analysis to determine the correct identity. <sup>1</sup>H NMR confirmed that the 8.7 ppm peaks belonged to **5A** making **5A** the major product and **5B** the minor product in this reaction.

Purified Product Mixture:

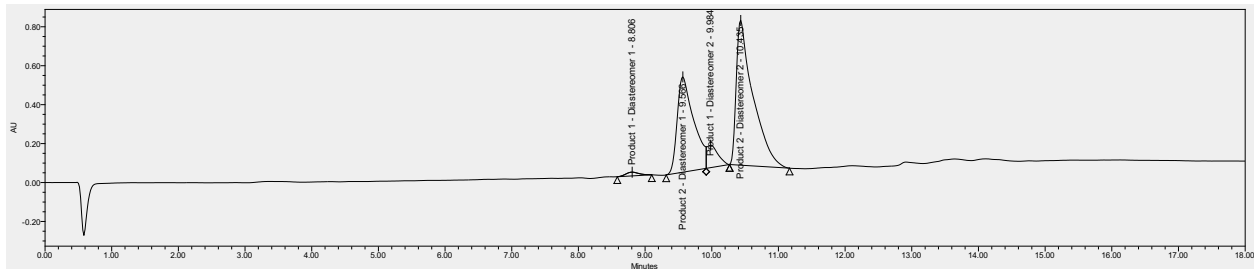

Major Product - Diastereomer 1:

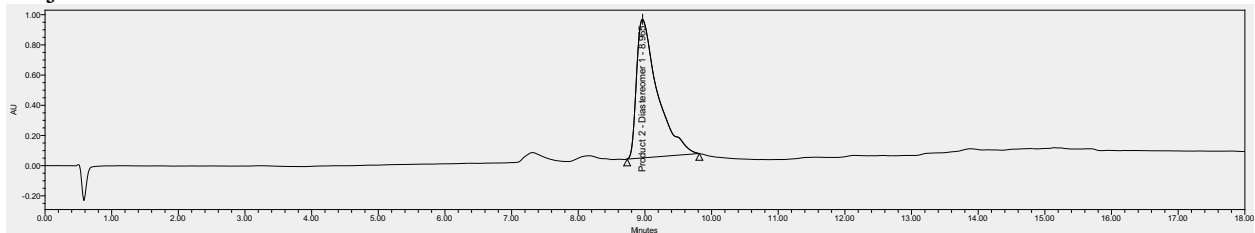

|   | Name                       | Retention Time | Area     | % Area |
|---|----------------------------|----------------|----------|--------|
| 1 | Product 2 - Diastereomer 1 | 8.965          | 20005346 | 100.00 |

Major Product - Diastereomer 2:

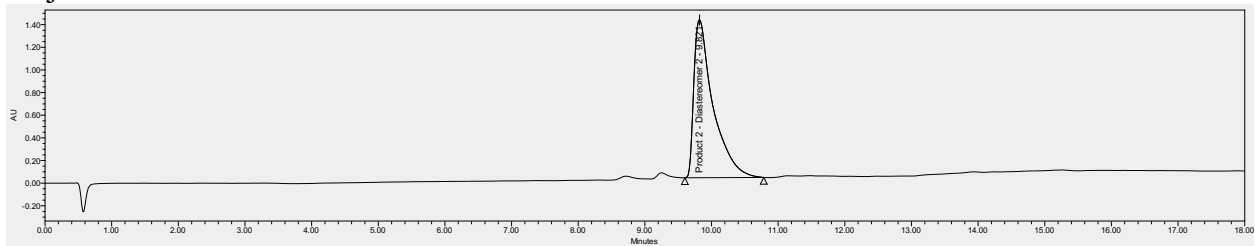

|   | Name                       | Retention Time | Area     | % Area |
|---|----------------------------|----------------|----------|--------|
| 1 | Product 2 - Diastereomer 2 | 9.821          | 27807872 | 100.00 |

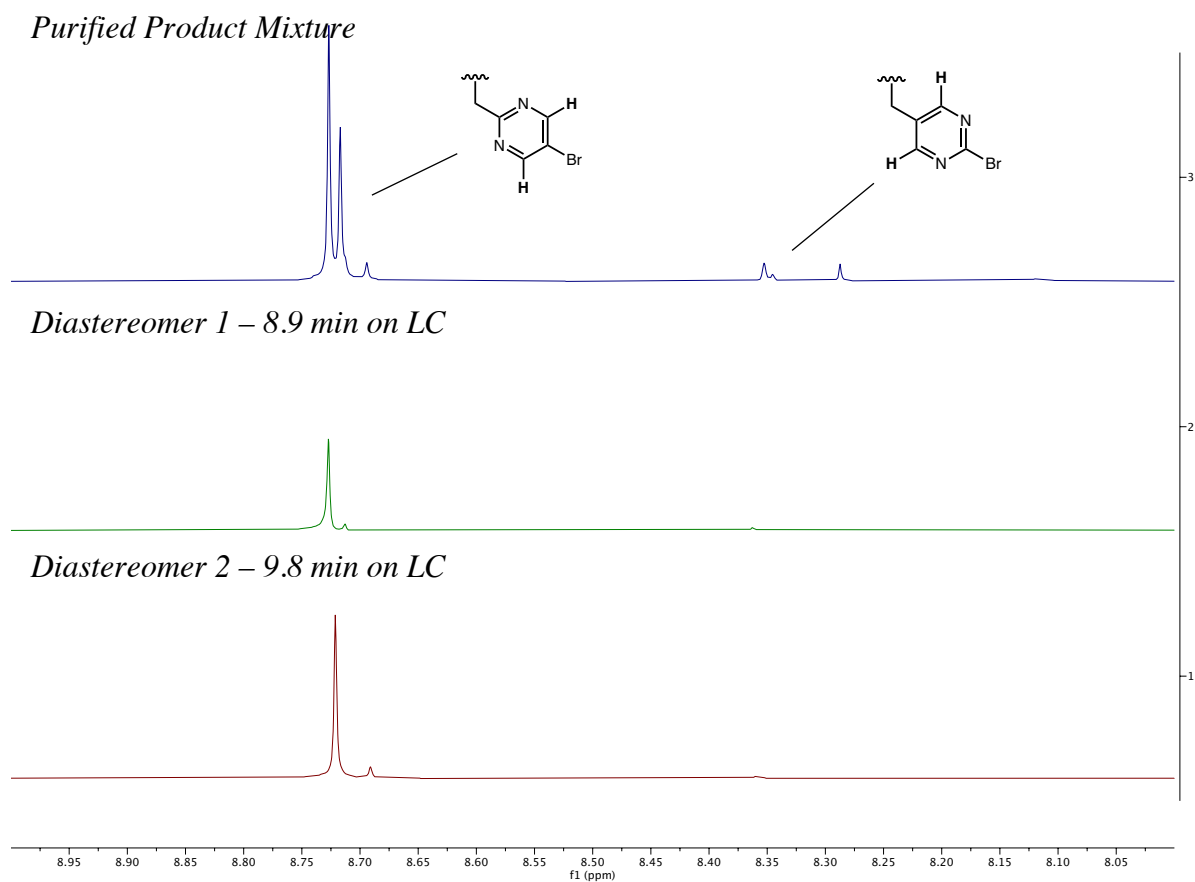

**Figure S6.** Determination of the chemoselectivity of product **5** by  $^1\text{H}$  NMR with  $\text{CD}_3\text{CN}$  as solvent.

## Peptide products from batch reactions

### UPLC Column Methods:

A = Acetonitrile with 1% formic acid modifier, B = ddH<sub>2</sub>O with 1% formic acid modifier.

For compounds **1-16**, **18-20**: Waters Zorbax StableBondC18 3.5  $\mu$ , 2.1 x 100 mm column (0.5 mL/min flow rate).

| Time: | %A:  | %B:  |
|-------|------|------|
| 0.0   | 5.0  | 95.0 |
| 2.0   | 5.0  | 95.0 |
| 3.0   | 10.0 | 90.0 |
| 10.0  | 20.0 | 80.0 |
| 12.0  | 30.0 | 70.0 |
| 16.5  | 95.0 | 5.0  |
| 18.0  | 95.0 | 5.0  |

For compound **17**: Waters XBridge BEH C18 (2.5  $\mu$ , 4.6 x 150 mm) column (1.0 mL/min flow rate).

| Time: | %A:  | %B:  |
|-------|------|------|
| 0.0   | 5.0  | 95.0 |
| 2.0   | 5.0  | 95.0 |
| 8.0   | 95.0 | 5.0  |
| 10.0  | 95.0 | 5.0  |
| 11.5  | 5.0  | 95.0 |
| 12.0  | 5.0  | 95.0 |

For compound **21-24**: Supelco Discovery Bio Wide Pore C8 (3.0  $\mu$ , 4.6 mm x 10 cm) column).

#### *Compounds 22 and 23:*

0.4 mL/min flow rate

| Time: | %A:  | %B:   |
|-------|------|-------|
| 0.0   | 0.0  | 100.0 |
| 1.0   | 0.0  | 100.0 |
| 2.0   | 5.0  | 95.0  |
| 10.5  | 95.0 | 5.0   |
| 12.0  | 95.0 | 5.0   |

#### *Compounds 21 and 24:*

0.5 mL/min flow rate

| Time: | %A:  | %B:  |
|-------|------|------|
| 0.0   | 5.0  | 95.0 |
| 2.0   | 5.0  | 95.0 |
| 10.5  | 95.0 | 5.0  |
| 12.0  | 95.0 | 5.0  |

*Compounds 2 and 8 (for determining % conversions)*

0.5 mL/min flow rate

| Time: | %A:  | %B:  |
|-------|------|------|
| 0.0   | 5.0  | 95.0 |
| 2.0   | 5.0  | 95.0 |
| 3.0   | 10.0 | 90.0 |
| 9.0   | 30.0 | 70.0 |
| 17.0  | 50.0 | 50.0 |
| 17.5  | 95.0 | 5.0  |
| 19.0  | 95.0 | 5.0  |
| 19.5  | 5.0  | 95.0 |
| 20.0  | 5.0  | 95.0 |

**Note:** <sup>1</sup>H NMR spectra were primarily taken in CD<sub>3</sub>CN or CD<sub>3</sub>OD to improve resolution, but a small amount of D<sub>2</sub>O was also required for many peptides to achieve sufficient solubility.

1: Synthesized by the general procedure for pyrimidine sidechains

MW = 509.6, % Conversion = >99%, Isolated yield = 77% [9.1 mg]

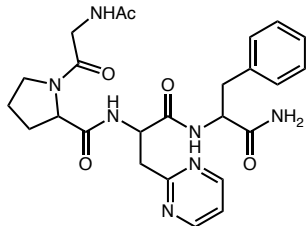

Crude:

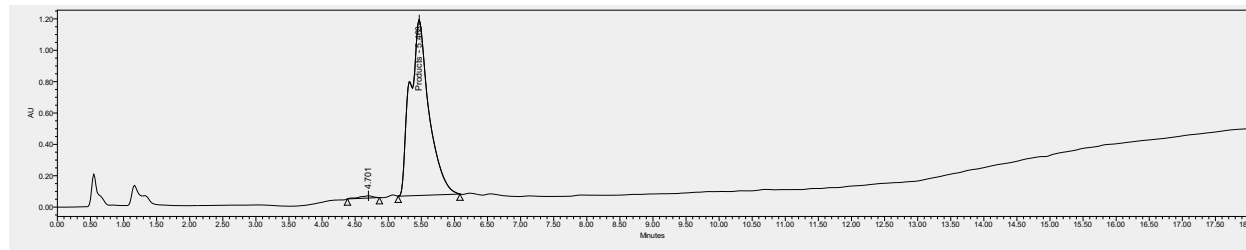

|   | Name     | Retention Time | Area     | % Area |
|---|----------|----------------|----------|--------|
| 1 |          | 4.701          | 208937   | 0.93   |
| 2 | Products | 5.468          | 22161585 | 99.07  |

Isolated Epimers:

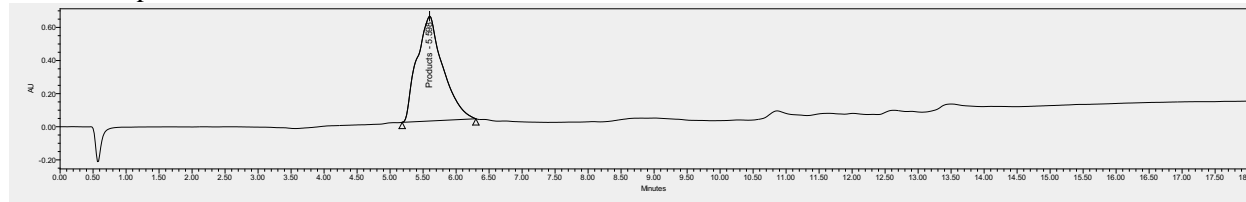

|   | Name     | Retention Time | Area     | % Area |
|---|----------|----------------|----------|--------|
| 1 | Products | 5.598          | 17300170 | 100.00 |

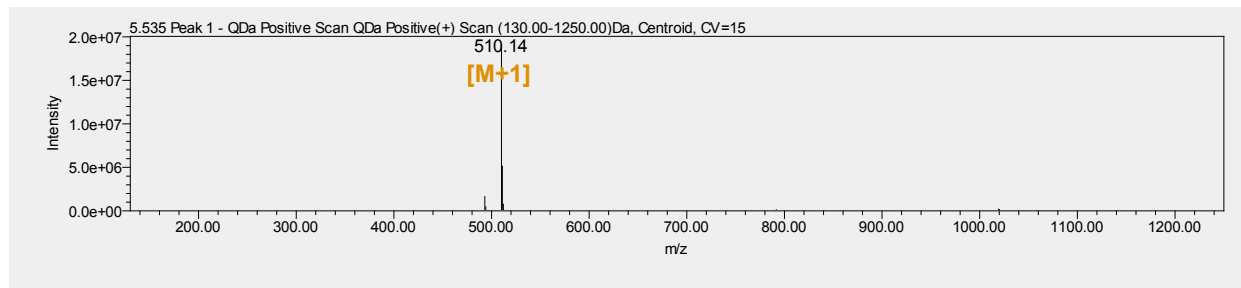



2: Synthesized by the general procedure for pyrimidine sidechains with **deviation 2**

MW = 509.6, % Conversion = 60%, Isolated yield = 44% [5.2 mg]

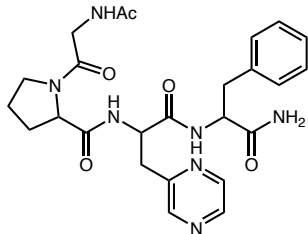

Crude: (Used different column method to determine % conversion due to overlap in spectrum)

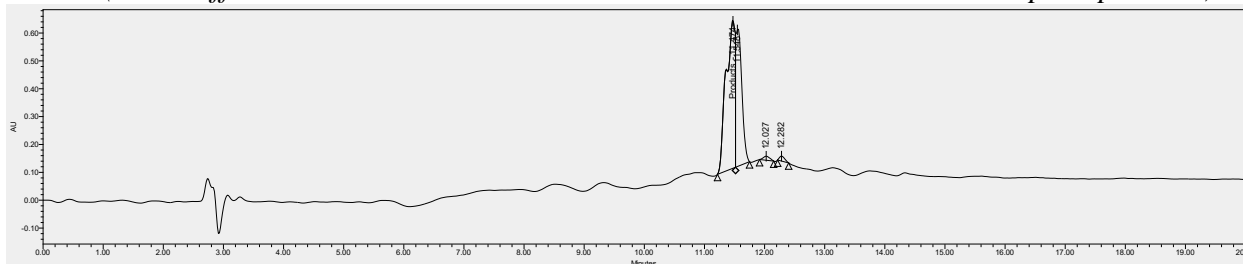

|   | Name     | Retention Time | Area    | % Area |
|---|----------|----------------|---------|--------|
| 1 | Products | 11.474         | 5491389 | 59.93  |
| 2 |          | 11.548         | 3452401 | 37.68  |
| 3 |          | 12.027         | 110226  | 1.20   |
| 4 |          | 12.282         | 109286  | 1.19   |

Isolated Epimers:

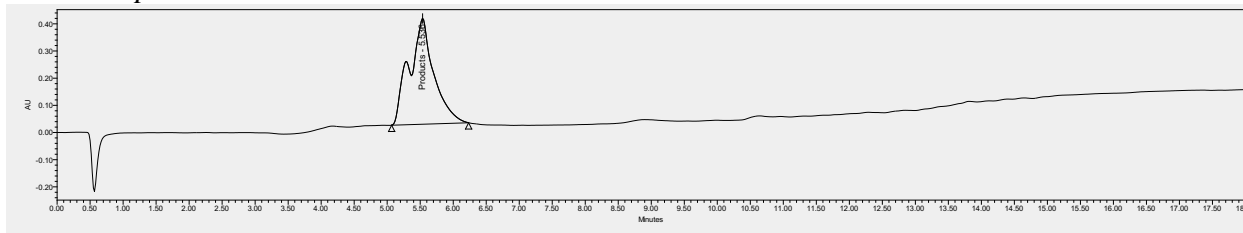

|   | Name     | Retention Time | Area     | % Area |
|---|----------|----------------|----------|--------|
| 1 | Products | 5.536          | 10028917 | 100.00 |

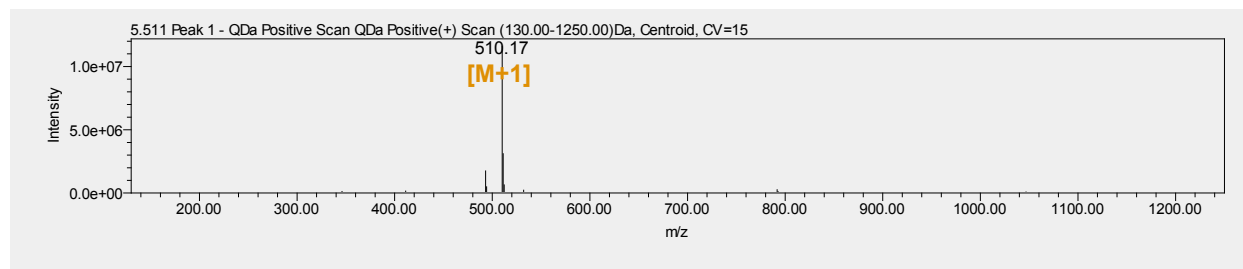



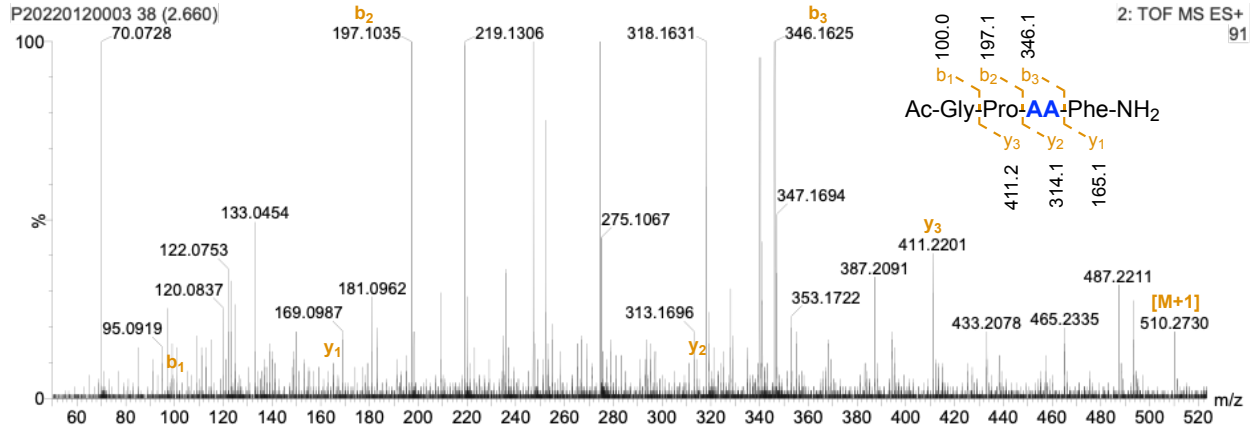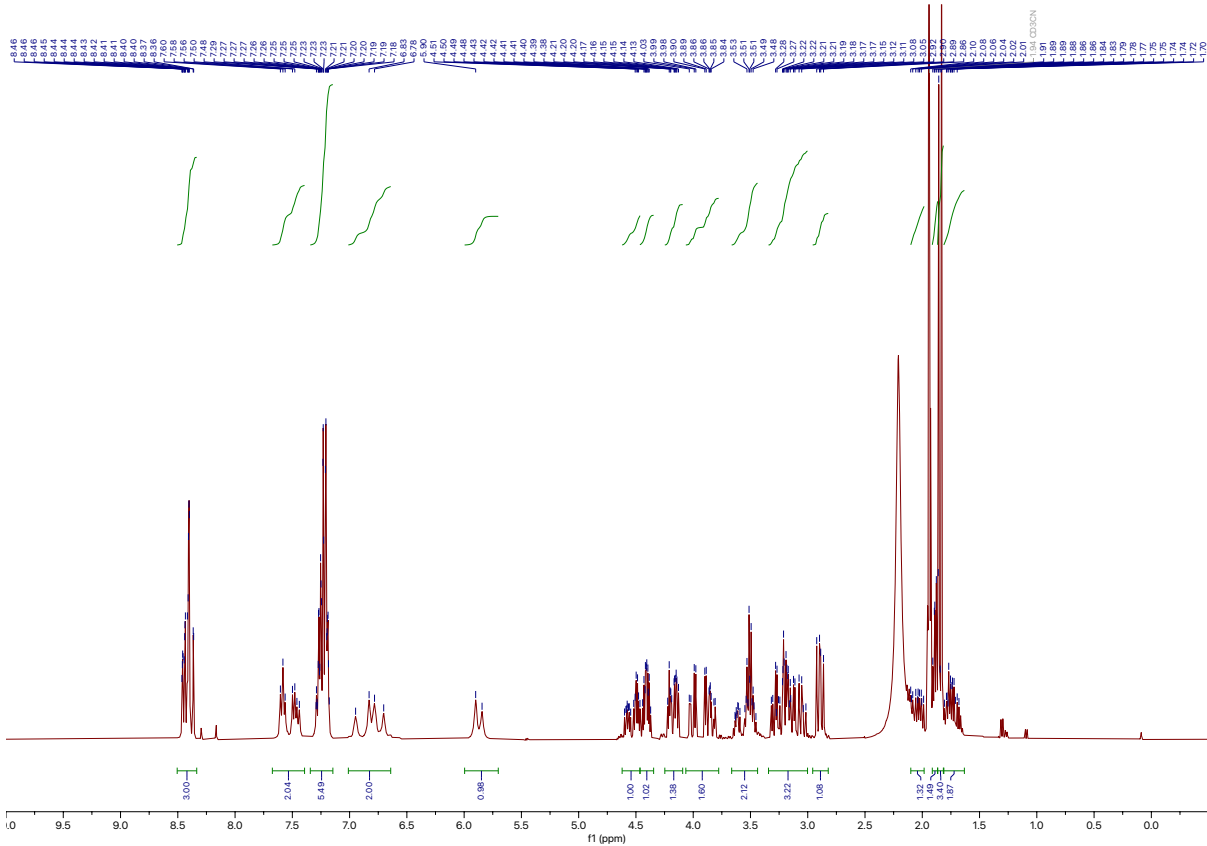

**3: Synthesized by the general procedure for pyrimidine sidechains with deviation 2**

MW = 527.6, % Conversion = 73%, Isolated yield = 47% [5.8 mg]

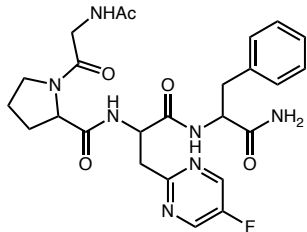

*Crude:*

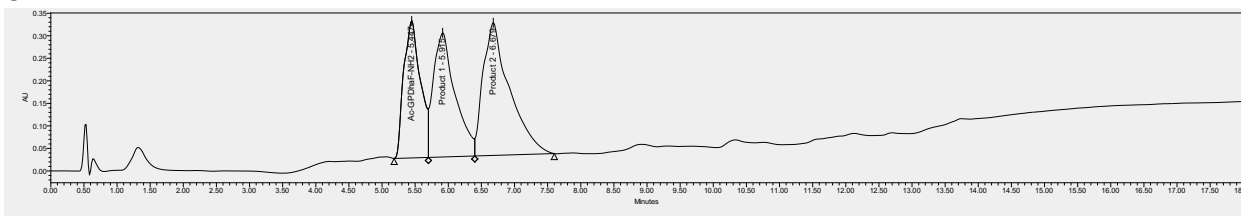

|   | Name          | Retention Time | Area    | % Area |
|---|---------------|----------------|---------|--------|
| 1 | Ac-GPDhaF-NH2 | 5.447          | 5301248 | 26.75  |
| 2 | Product 1     | 5.915          | 6312401 | 31.85  |
| 3 | Product 2     | 6.679          | 8205988 | 41.40  |

*Isolated Epimers:*

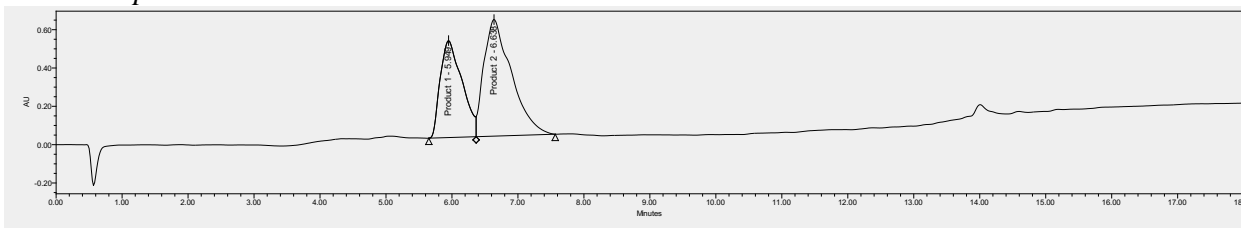

|   | Name      | Retention Time | Area     | % Area |
|---|-----------|----------------|----------|--------|
| 1 | Product 1 | 5.949          | 11585118 | 39.57  |
| 2 | Product 2 | 6.638          | 17691956 | 60.43  |

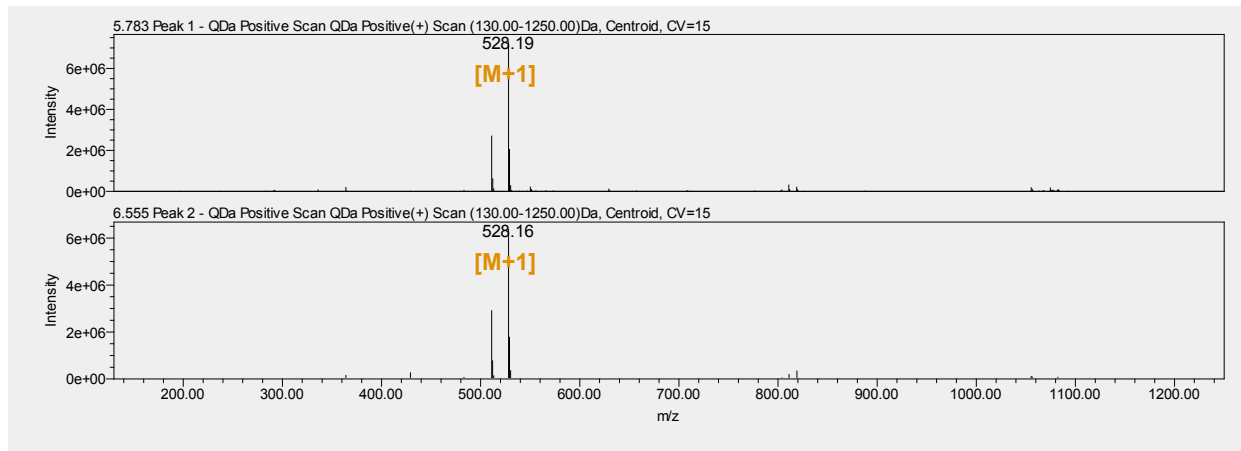

P20220120004 41 (2.870)

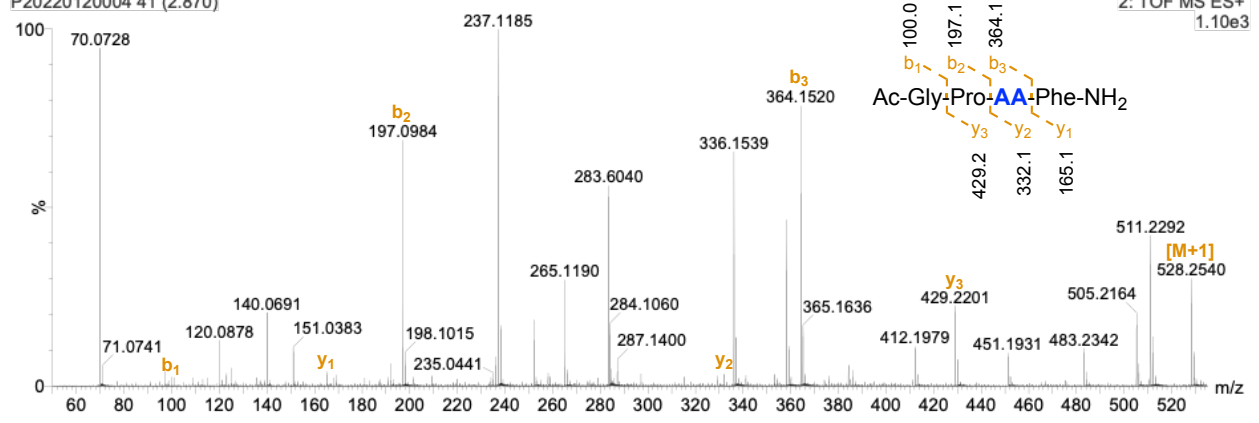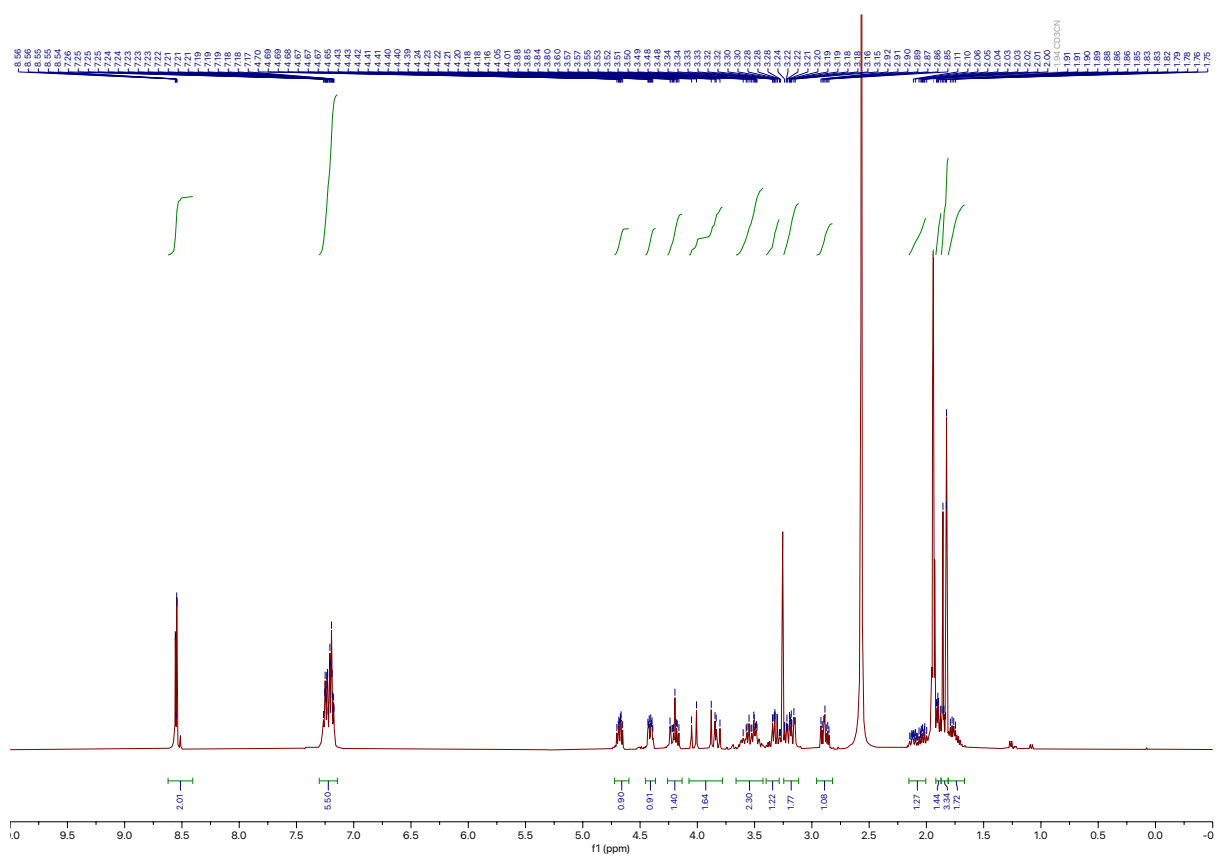

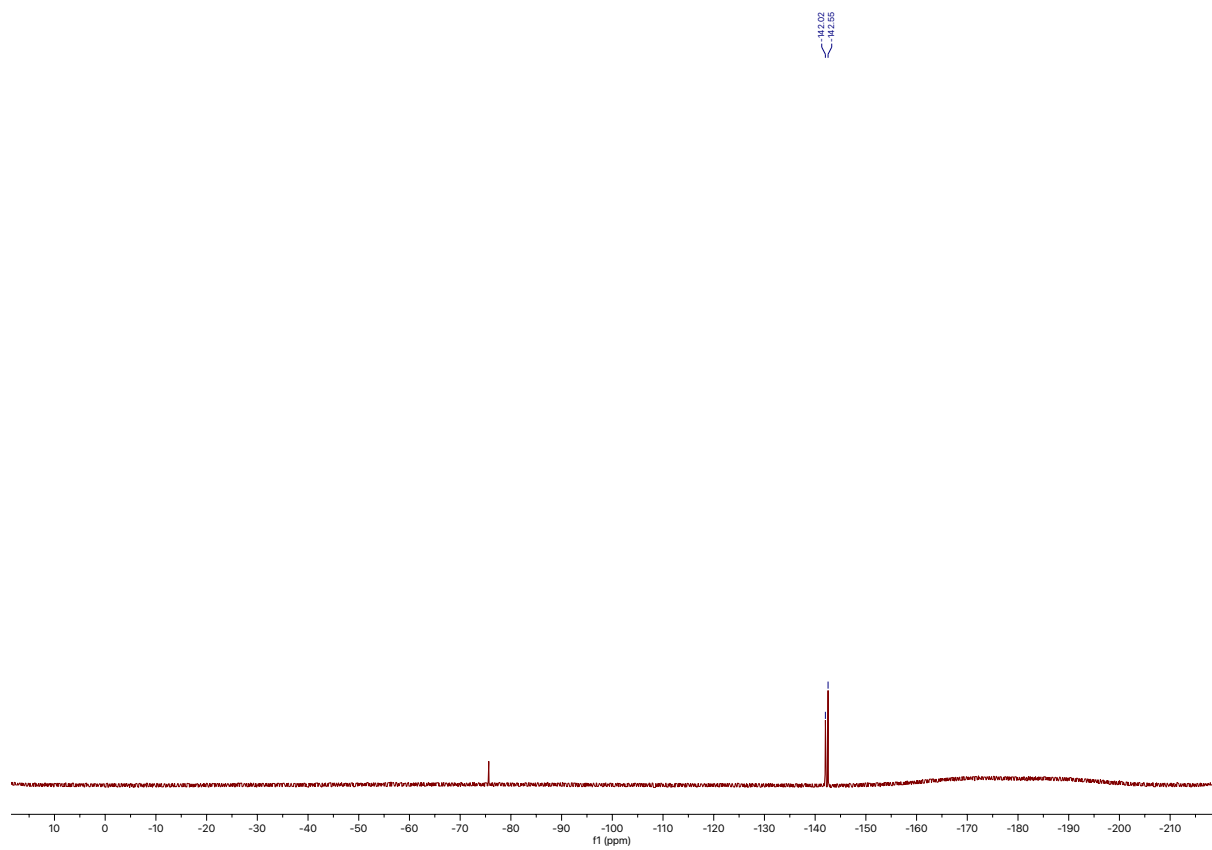

#### 4: Synthesized by the general procedure for pyrimidine sidechains with **deviations 1 and 2**

MW = 544.0, % Conversion = 71%, Isolated yield = 51% [6.5 mg]

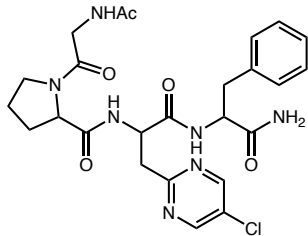

#### Crude:

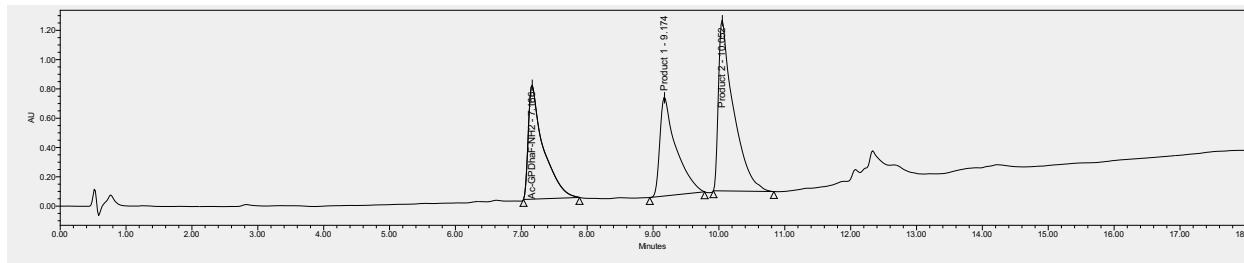

|   | Name          | Retention Time | Area     | % Area |
|---|---------------|----------------|----------|--------|
| 1 | Ac-GPDhaF-NH2 | 7.166          | 12271100 | 28.99  |
| 2 | Product 1     | 9.174          | 11520827 | 27.22  |
| 3 | Product 2     | 10.052         | 18539017 | 43.80  |

#### Isolated Epimers:

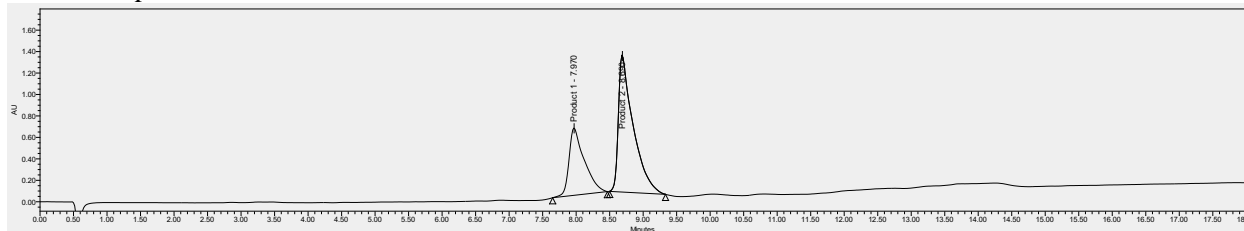

|   | Name      | Retention Time | Area     | % Area |
|---|-----------|----------------|----------|--------|
| 1 | Product 1 | 7.970          | 9937794  | 33.69  |
| 2 | Product 2 | 8.690          | 19556276 | 66.31  |

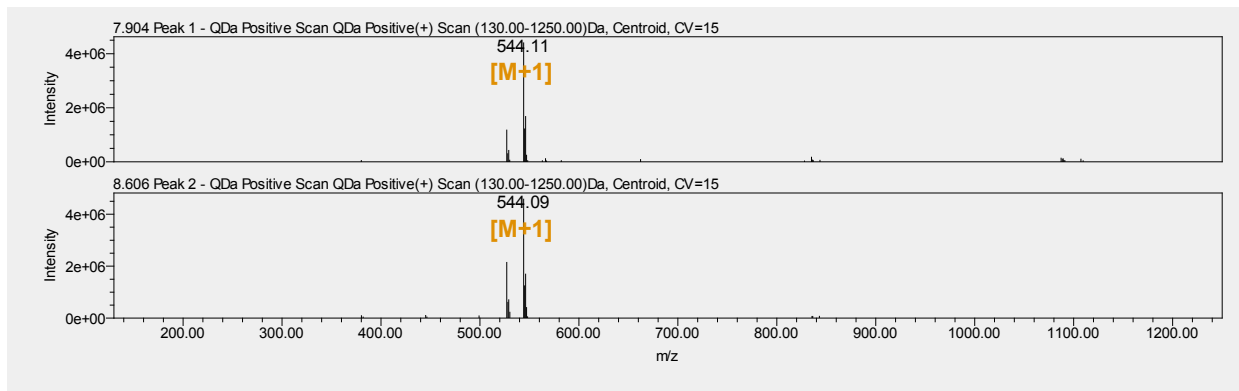

P20220120005 46 (3.221)

2: TOF MS ES+  
378

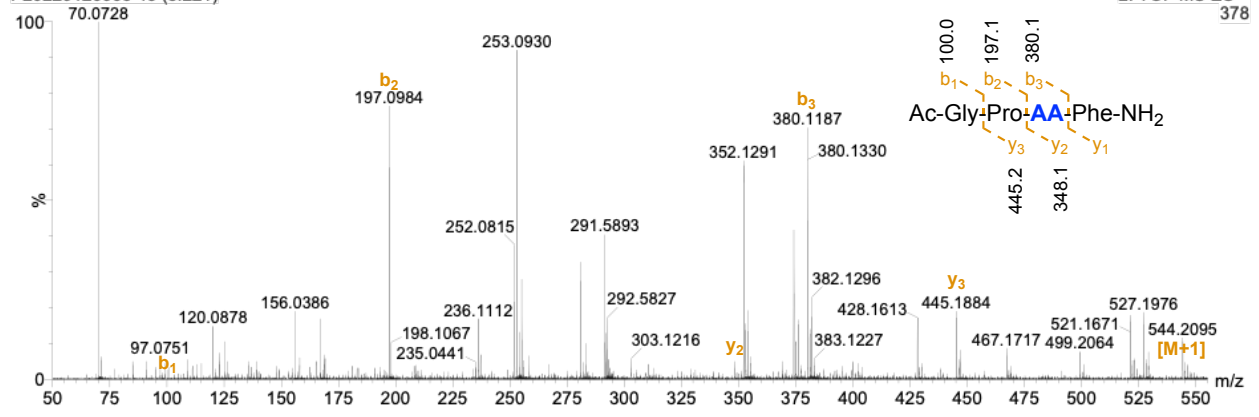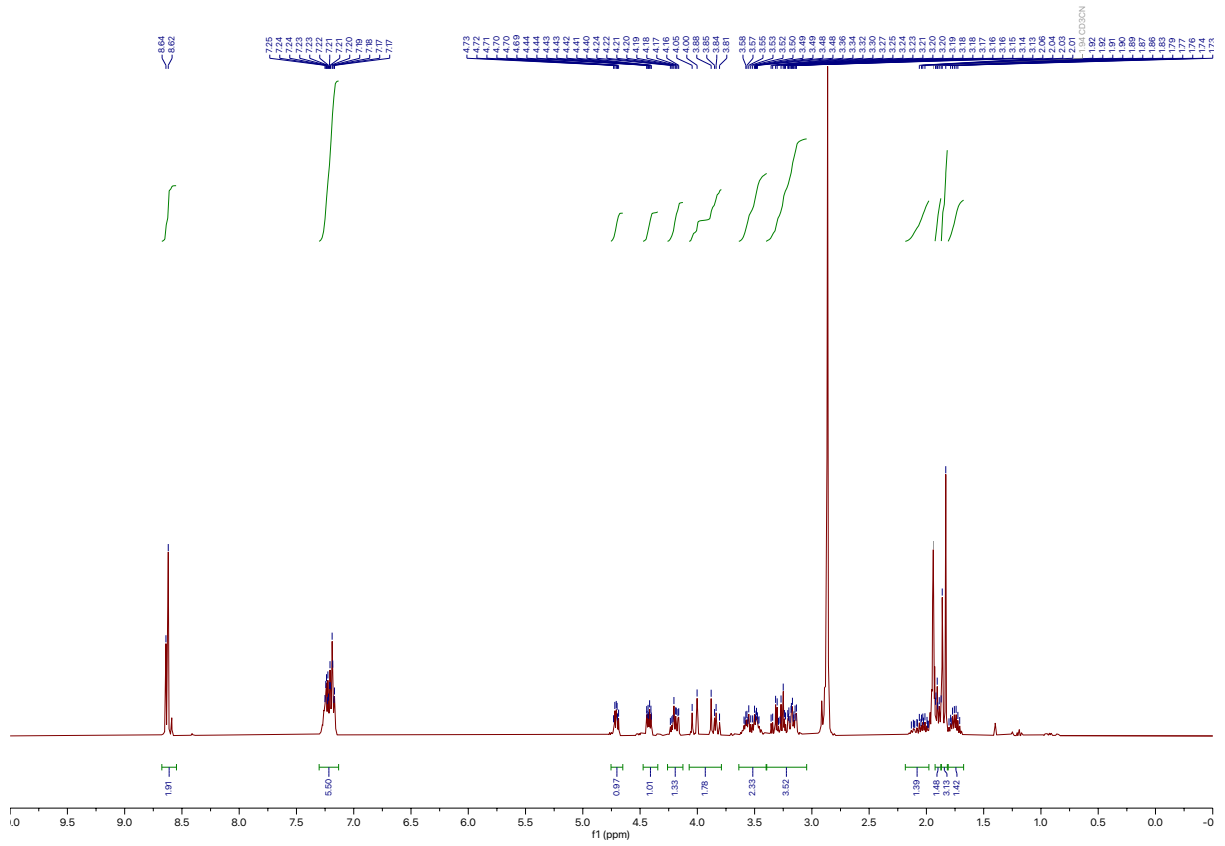

**5:** Synthesized by the general procedure for pyrimidine sidechains with **deviations 1 and 2**

MW = 588.5, % Conversion = 69%, Combined isolated yield = 46% [6.3 mg]

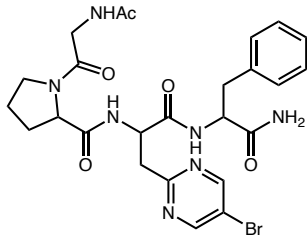

*Crude:*

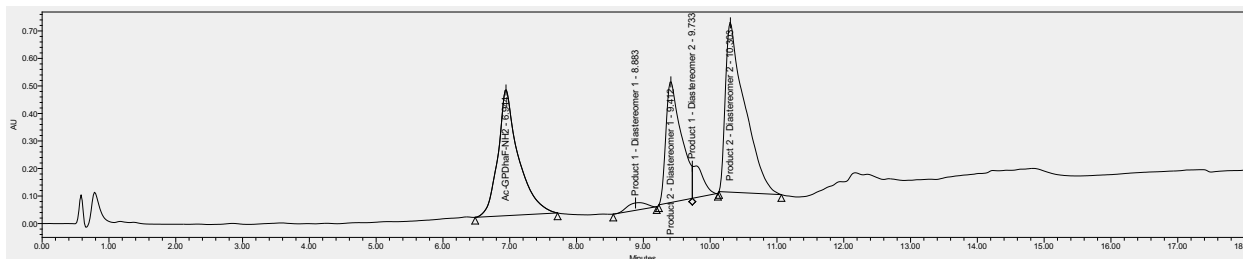

|   | Name                       | Retention Time | Area     | % Area |
|---|----------------------------|----------------|----------|--------|
| 1 | Ac-GPDhaF-NH2              | 6.944          | 9759544  | 31.36  |
| 2 | Product 1 - Diastereomer 1 | 8.883          | 533502   | 1.71   |
| 3 | Product 2 - Diastereomer 1 | 9.412          | 7092923  | 22.79  |
| 4 | Product 1 - Diastereomer 2 | 9.733          | 1291671  | 4.15   |
| 5 | Product 2 - Diastereomer 2 | 10.303         | 12442885 | 39.98  |

*Isolated Epimers:*

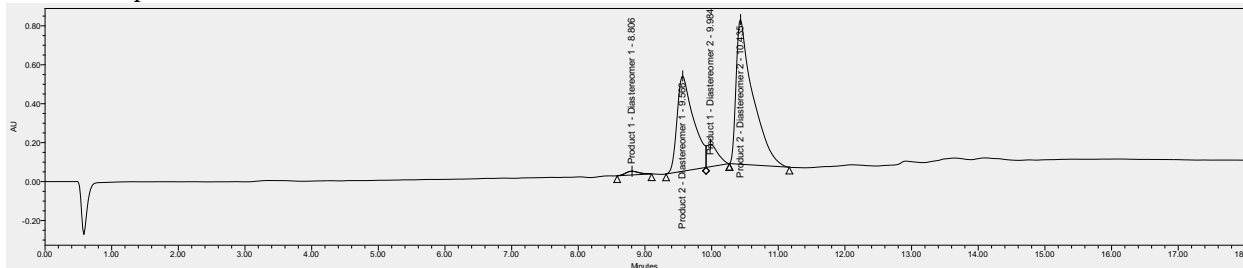

|   | Name                       | Retention Time | Area     | % Area |
|---|----------------------------|----------------|----------|--------|
| 1 | Product 1 - Diastereomer 1 | 8.806          | 268653   | 1.17   |
| 2 | Product 2 - Diastereomer 1 | 9.566          | 8422663  | 36.73  |
| 3 | Product 1 - Diastereomer 2 | 9.984          | 1323721  | 5.77   |
| 4 | Product 2 - Diastereomer 2 | 10.435         | 12913701 | 56.32  |

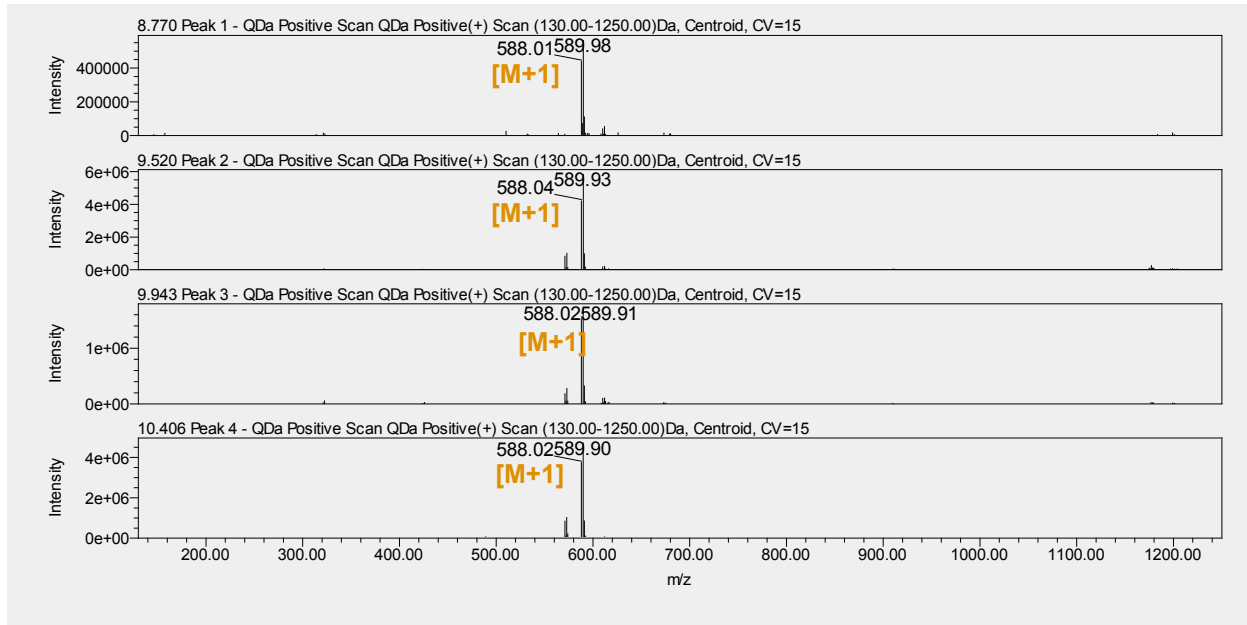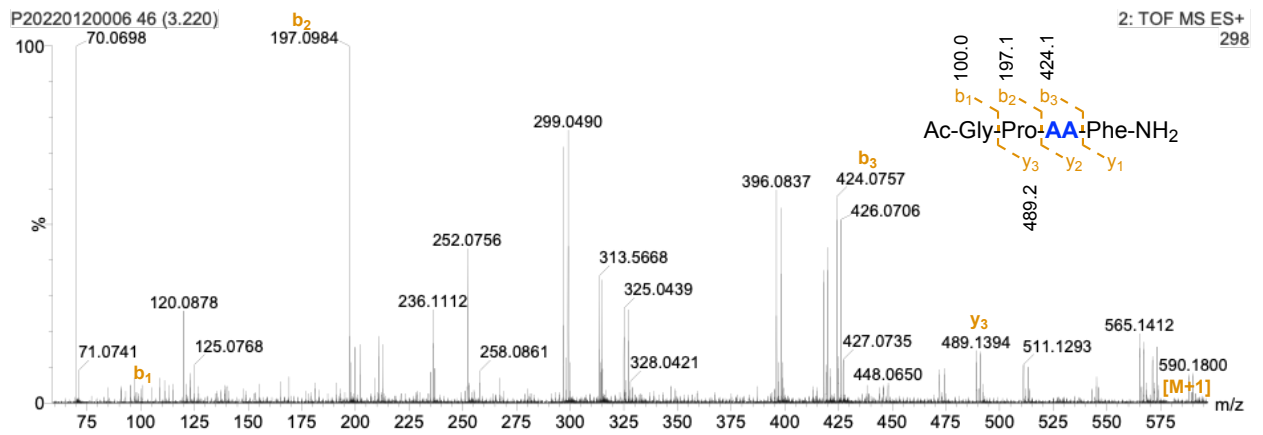



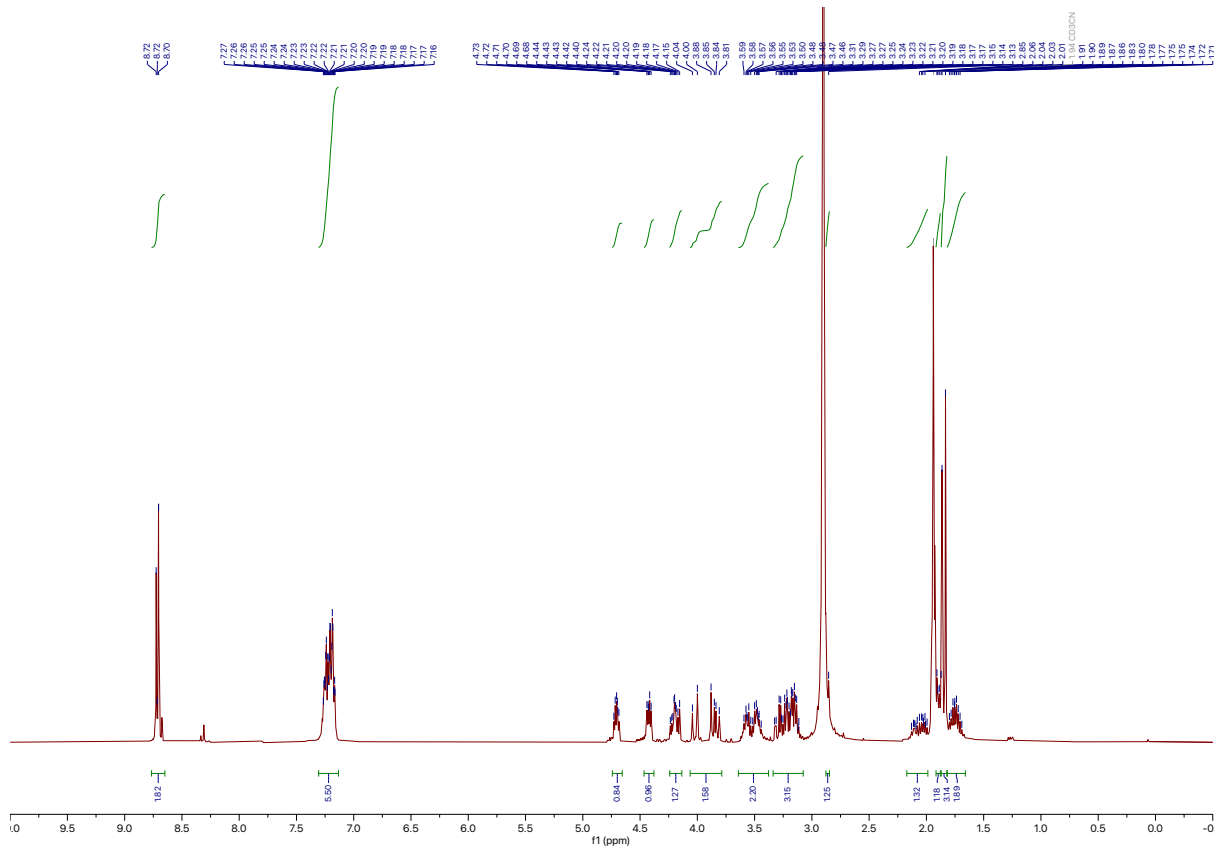

**6:** Synthesized by the general procedure for pyrimidine sidechains with **deviation 1**

MW = 523.6, % Conversion = 90%, Isolated yield = 62% [7.6 mg]

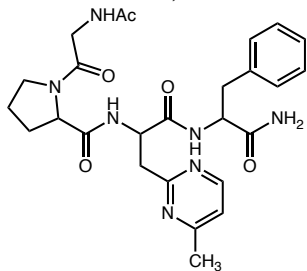

*Crude:*

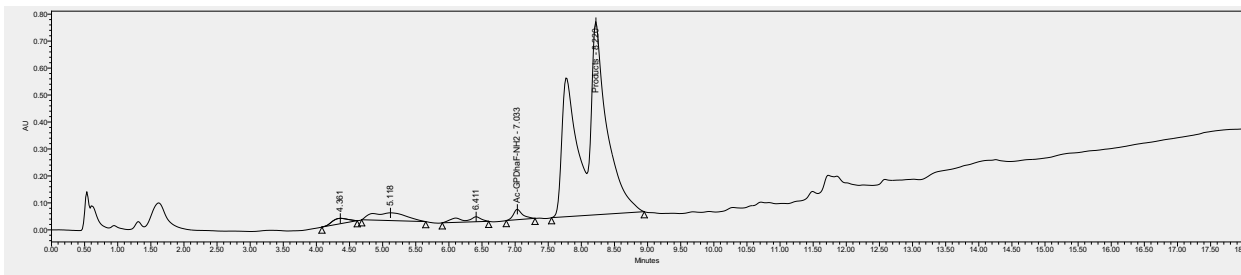

|   | Name          | Retention Time | Area     | % Area |
|---|---------------|----------------|----------|--------|
| 1 |               | 4.361          | 331694   | 1.51   |
| 2 |               | 5.118          | 1040142  | 4.74   |
| 3 |               | 6.411          | 392906   | 1.79   |
| 4 | Ac-GPDhaF-NH2 | 7.033          | 369767   | 1.69   |
| 5 | Products      | 8.220          | 19799802 | 90.27  |

*Isolated Epimers:*

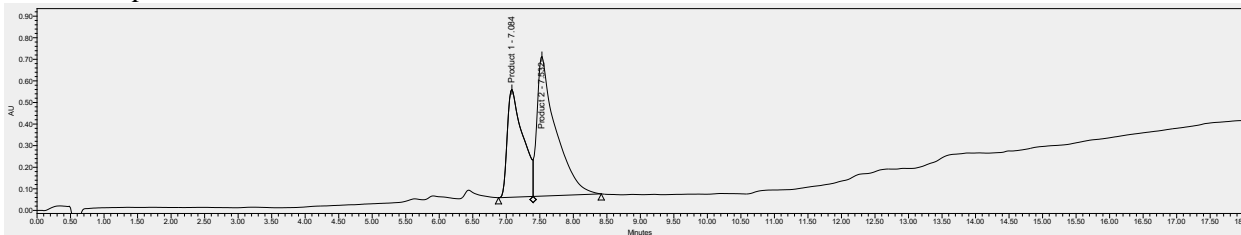

|   | Name      | Retention Time | Area     | % Area |
|---|-----------|----------------|----------|--------|
| 1 | Product 1 | 7.084          | 8119399  | 39.12  |
| 2 | Product 2 | 7.532          | 12638016 | 60.88  |

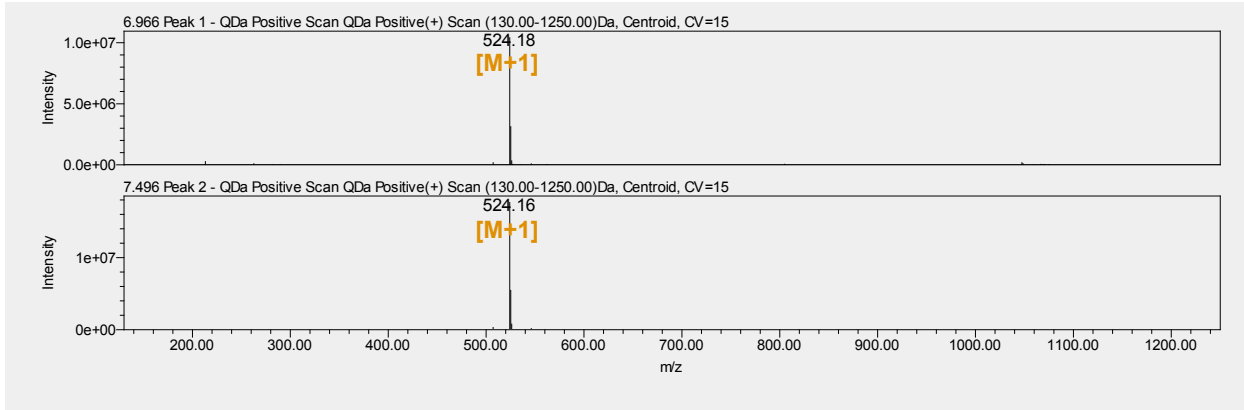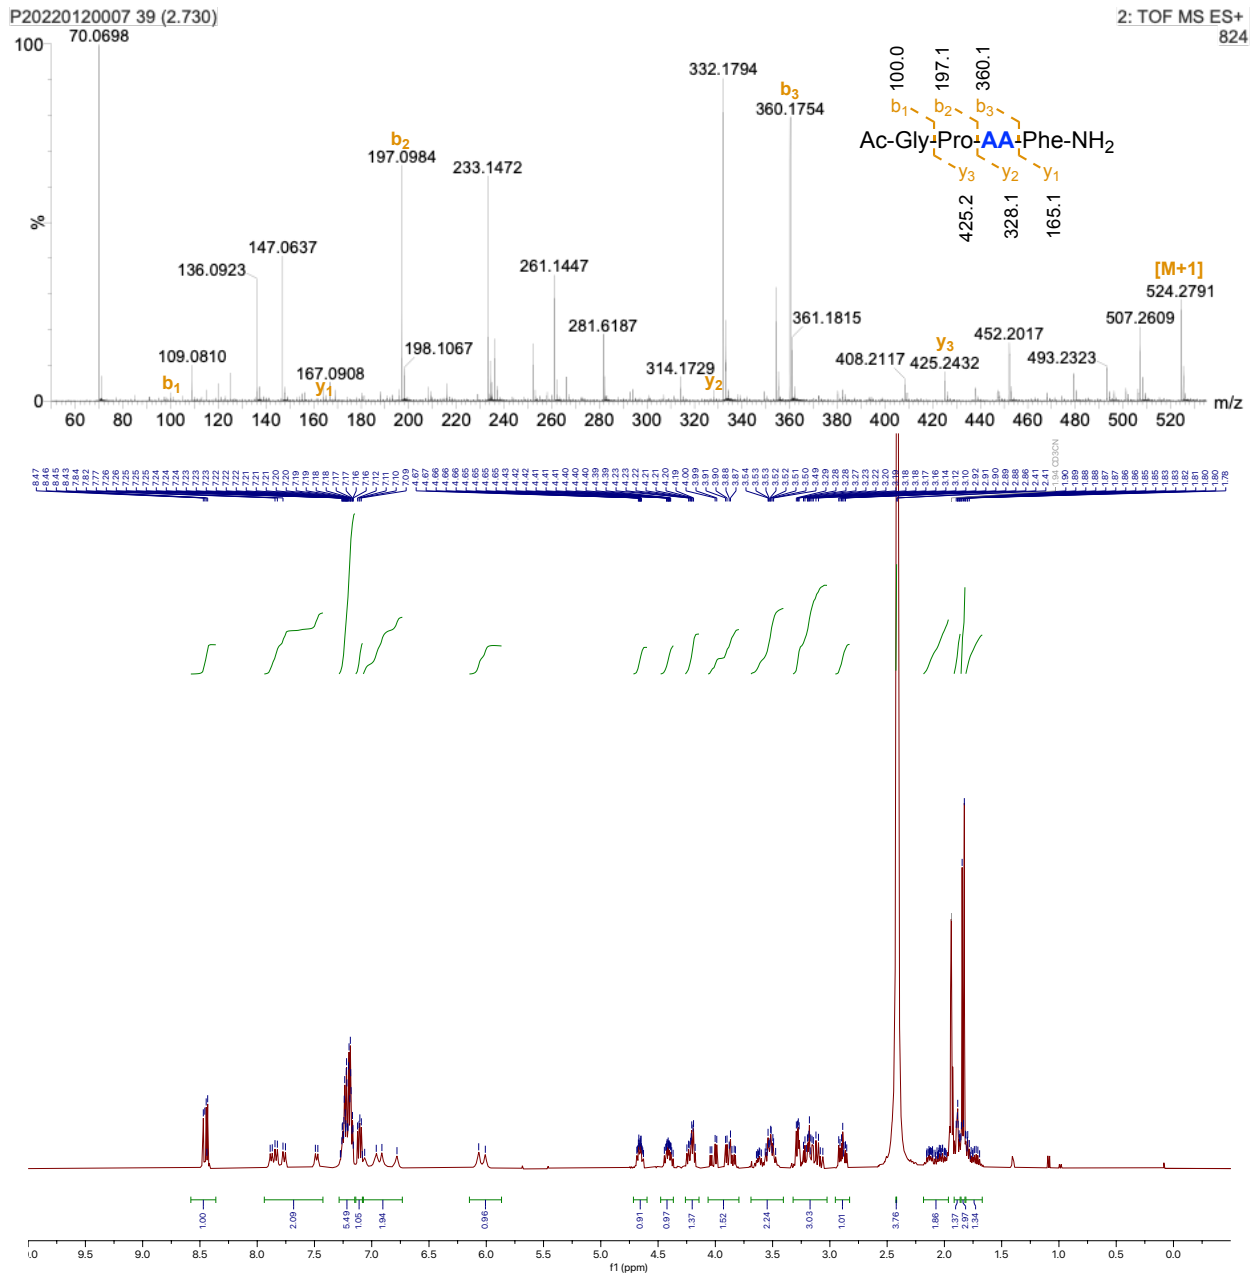

7: Synthesized by the general procedure for pyrimidine sidechains with **deviation 2**

MW = 524.6, % Conversion = 48%, Isolated yield = 29% [3.5 mg]

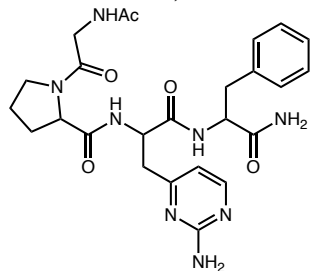

*Crude:*

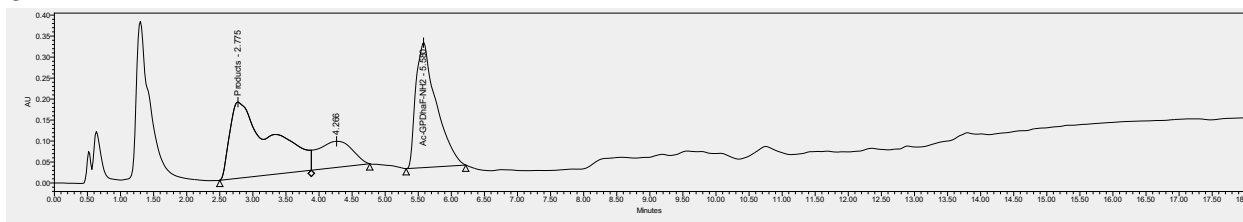

|   | Name          | Retention Time | Area    | % Area |
|---|---------------|----------------|---------|--------|
| 1 | Products      | 2.775          | 7901374 | 47.70  |
| 2 |               | 4.266          | 2273859 | 13.73  |
| 3 | Ac-GPDhaF-NH2 | 5.580          | 6389207 | 38.57  |

*Isolated Epimers:*

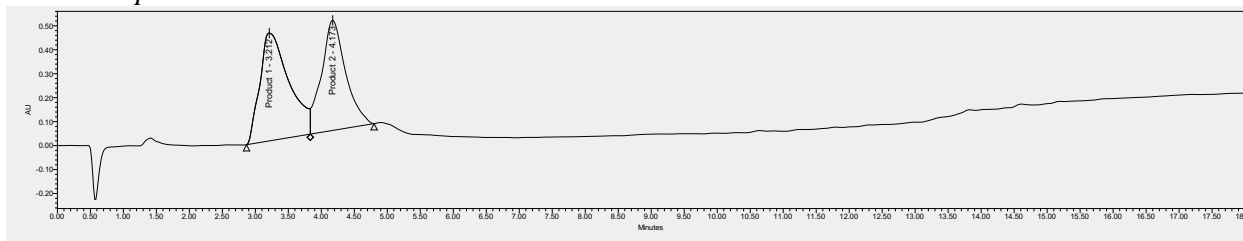

|   | Name      | Retention Time | Area     | % Area |
|---|-----------|----------------|----------|--------|
| 1 | Product 1 | 3.212          | 13855801 | 54.05  |
| 2 | Product 2 | 4.173          | 11781005 | 45.95  |

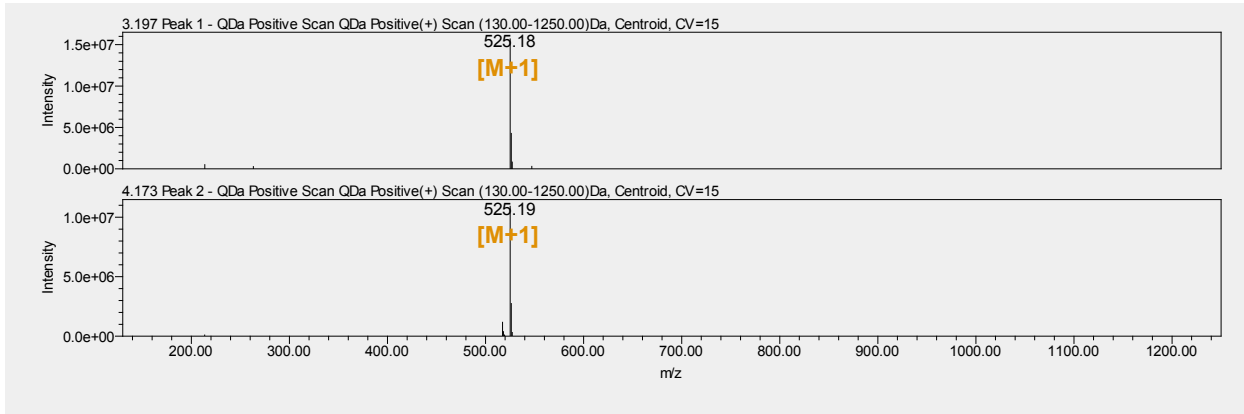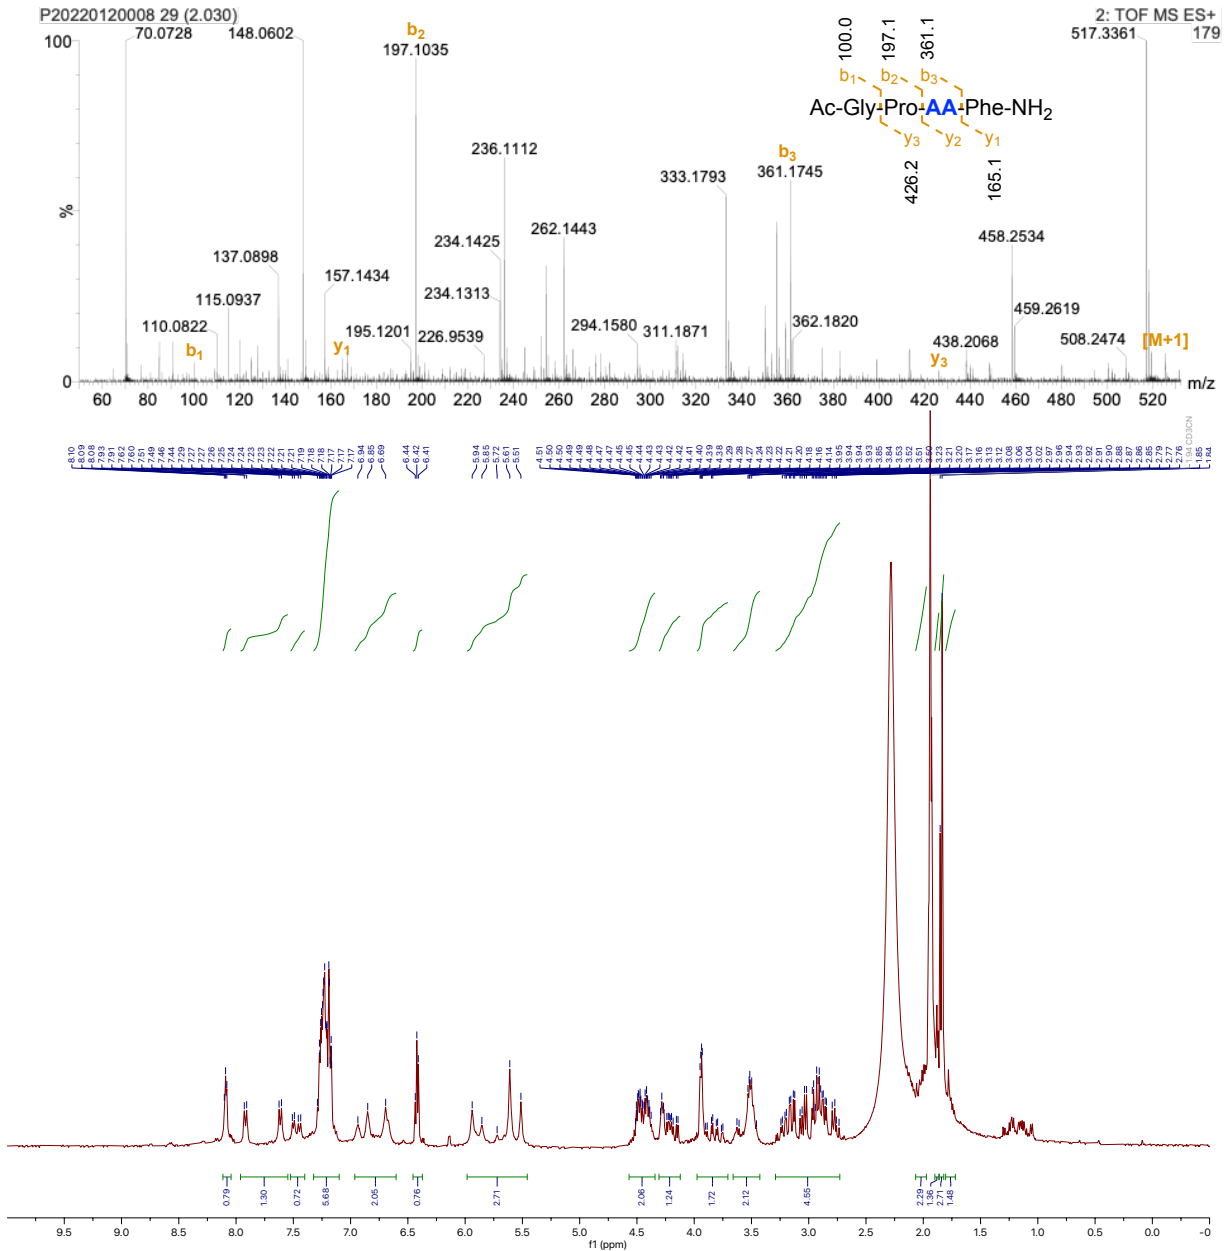

**8:** Synthesized by the general procedure for pyrimidine sidechains with **deviation 2**

MW = 549.6, % Conversion = 57%, Isolated yield = 52% [6.7 mg]

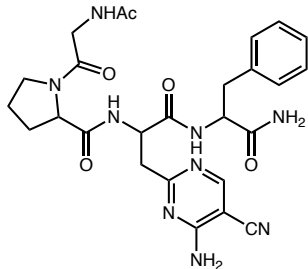

*Crude: (Used different column method to determine % conversion due to overlap in spectrum)*

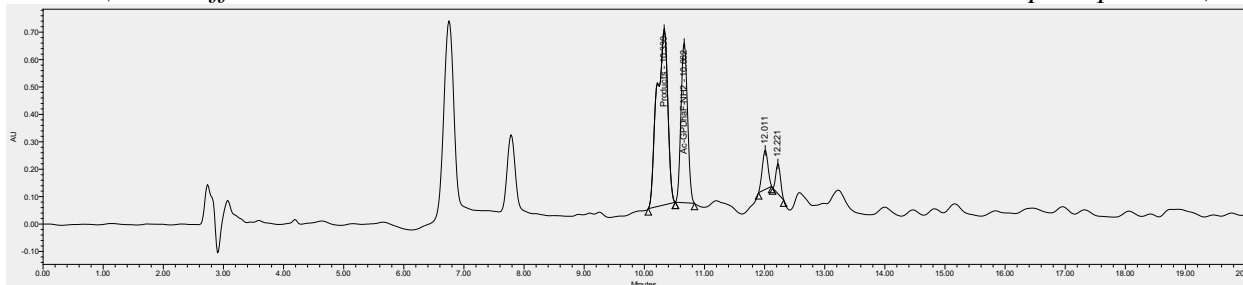

|   | Name          | Retention Time | Area    | % Area |
|---|---------------|----------------|---------|--------|
| 1 | Products      | 10.330         | 7971446 | 57.22  |
| 2 | Ac-GPDhaF-NH2 | 10.662         | 4427018 | 31.78  |
| 3 |               | 12.011         | 938731  | 6.74   |
| 4 |               | 12.221         | 593434  | 4.26   |

*Isolated Epimers:*

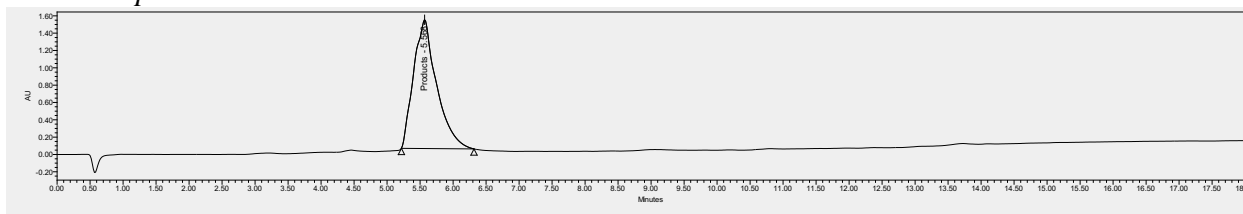

|   | Name     | Retention Time | Area     | % Area |
|---|----------|----------------|----------|--------|
| 1 | Products | 5.568          | 35999453 | 100.00 |

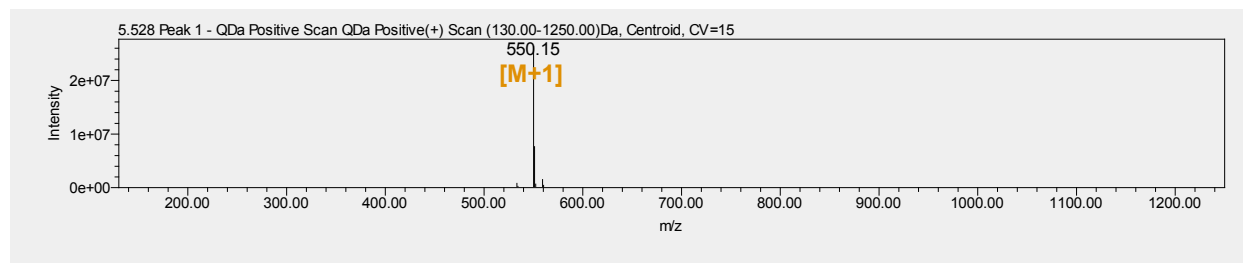



9: Synthesized by the general procedure for pyrimidine sidechains

MW = 525.6, % Conversion = 16%, Isolated yield = 10% [1.2 mg]

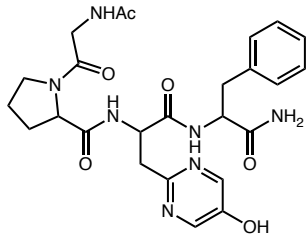

Crude:

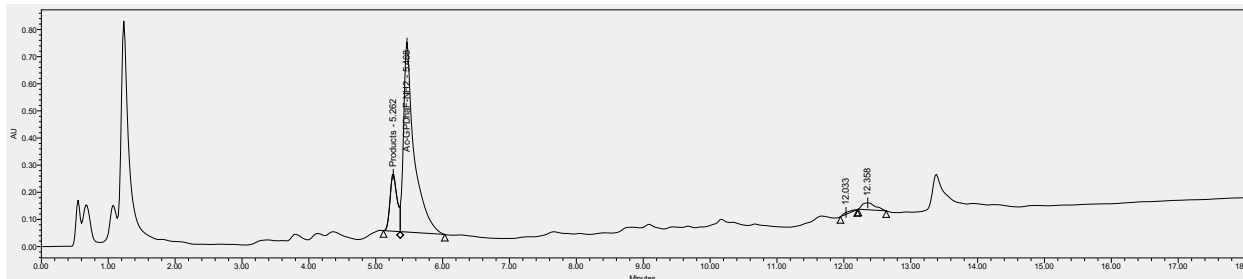

|   | Name          | Retention Time | Area    | % Area |
|---|---------------|----------------|---------|--------|
| 1 | Products      | 5.262          | 1561868 | 16.11  |
| 2 | Ac-GPDhaF-NH2 | 5.468          | 7703626 | 79.48  |
| 3 |               | 12.033         | 67653   | 0.70   |
| 4 |               | 12.358         | 359055  | 3.70   |

Isolated Epimers:

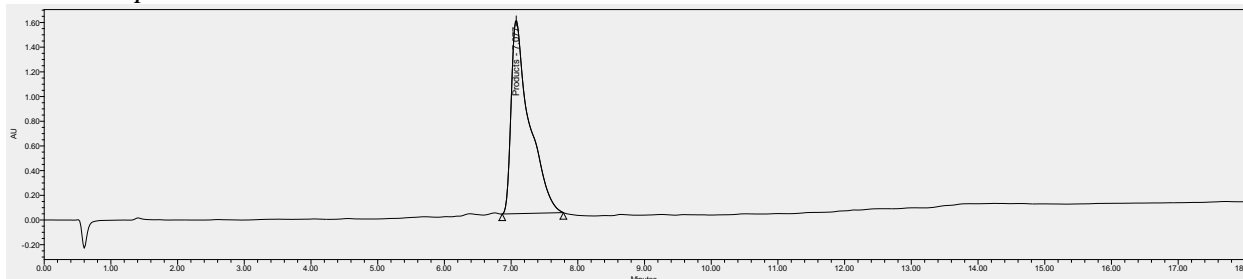

|   | Name     | Retention Time | Area     | % Area | Base Peak | Base Peak (Combined) |
|---|----------|----------------|----------|--------|-----------|----------------------|
| 1 | Products | 7.077          | 29639278 | 100.00 | 526.18    | 526.14               |

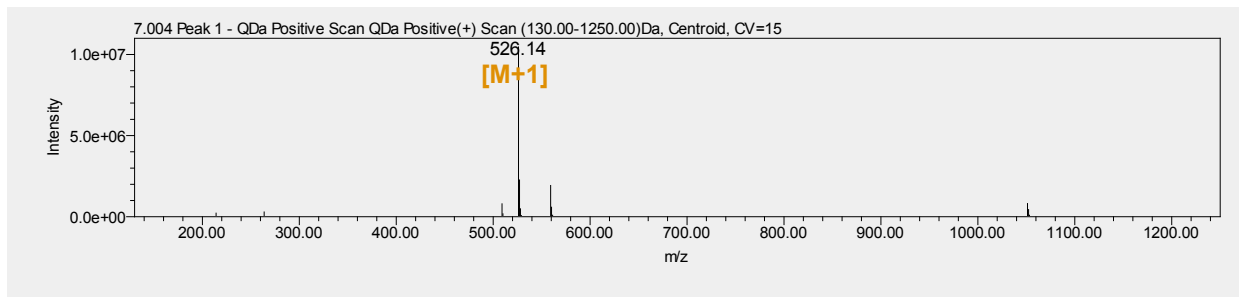



P20220120010 37 (2.591)

2: TOF MS ES+ 539

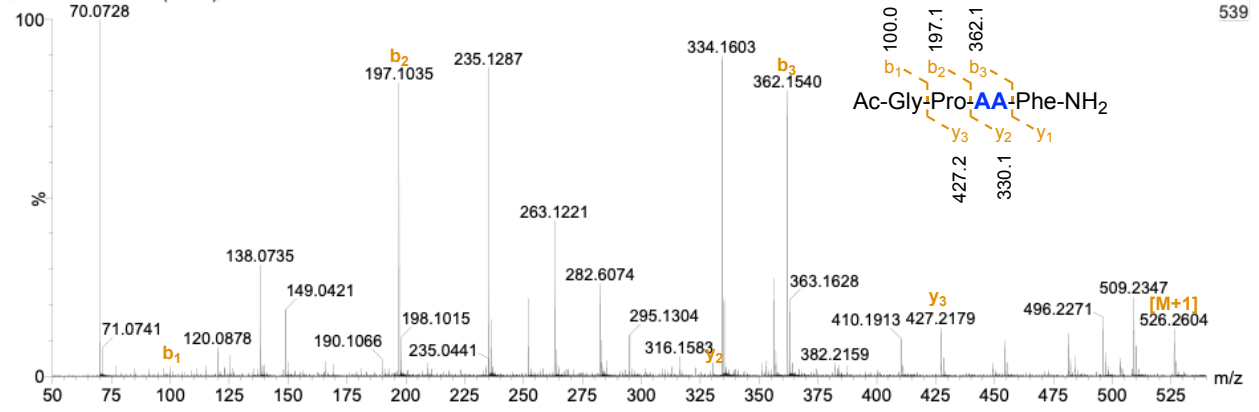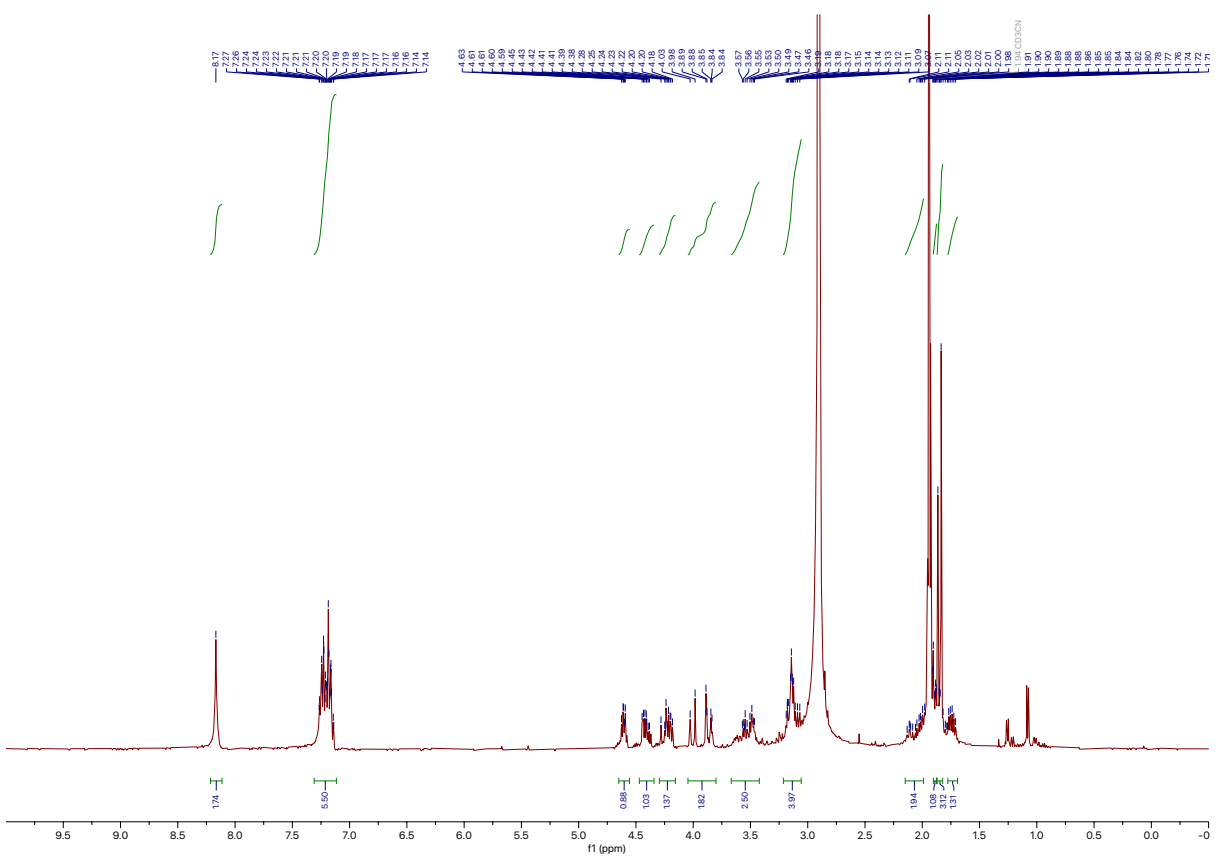

**10:** Synthesized by the general procedure for pyrimidine sidechains with **deviation 1**

MW = 525.6, % Conversion = 2%, Isolated yield = Not isolated.

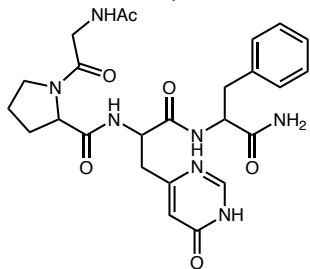

*Crude:*

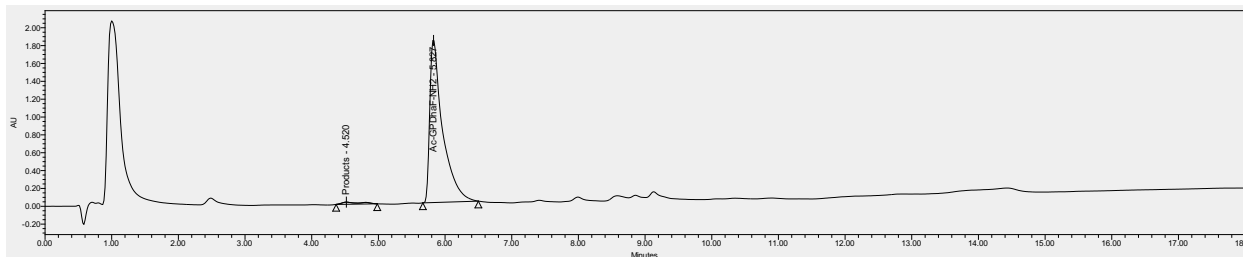

|   | Name          | Retention Time | Area     | % Area |
|---|---------------|----------------|----------|--------|
| 1 | Products      | 4.520          | 476153   | 1.92   |
| 2 | Ac-GPDhaF-NH2 | 5.827          | 24348484 | 98.08  |

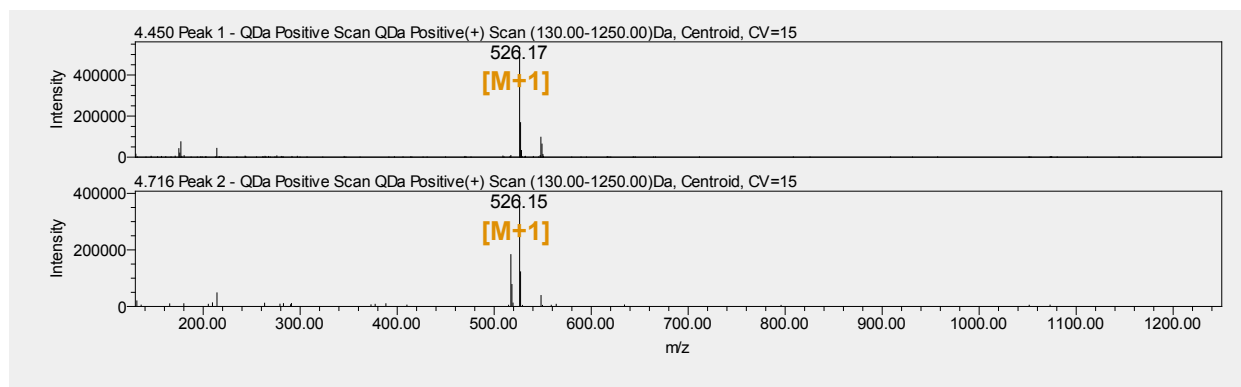

# 11: Synthesized by the general procedure for purine sidechains with **deviation 2**

MW = 549.6, % Conversion = 58%, Isolated yield = 25% [3.2 mg]

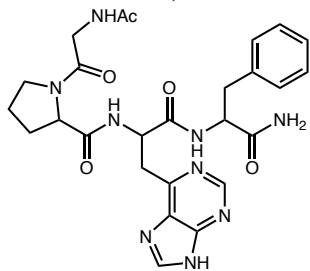

*Crude:*

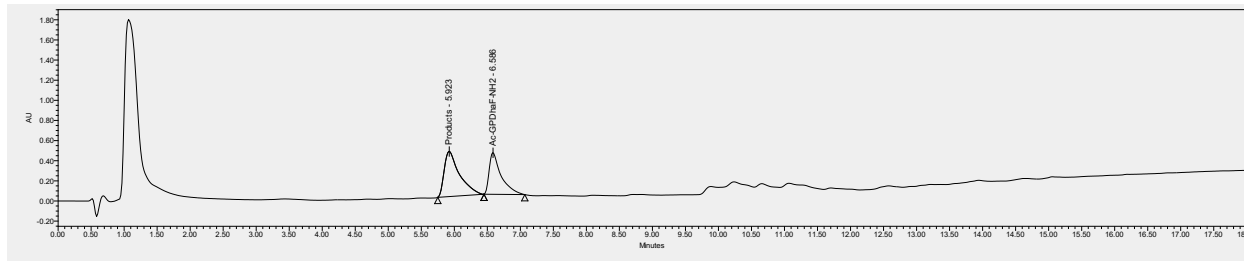

|   | Name          | Retention Time | Area    | % Area |
|---|---------------|----------------|---------|--------|
| 1 | Products      | 5.923          | 7193294 | 58.15  |
| 2 | Ac-GPDhaF-NH2 | 6.586          | 5177177 | 41.85  |

*Isolated Epimers:*

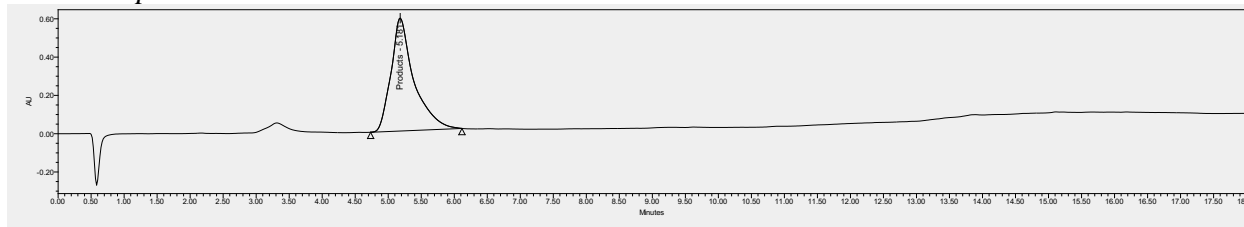

|   | Name     | Retention Time | Area     | % Area |
|---|----------|----------------|----------|--------|
| 1 | Products | 5.181          | 14181453 | 100.00 |

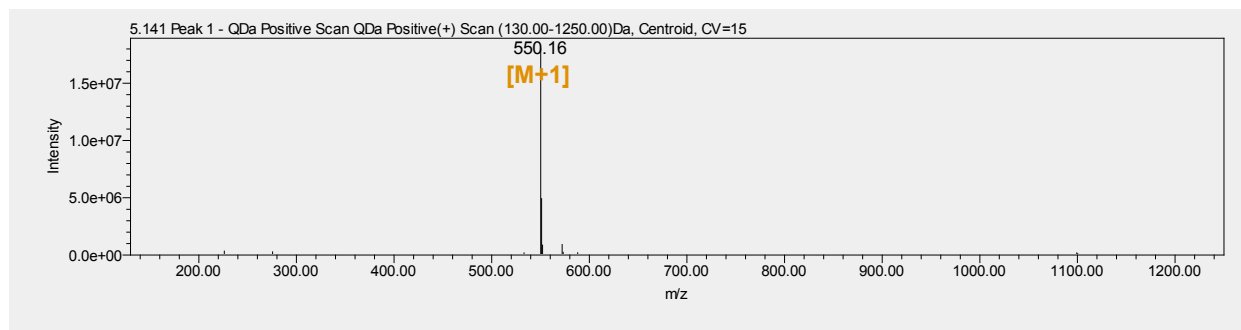

P20220120011 35 (2.450)

2: TOF MS ES+  
1.21e3

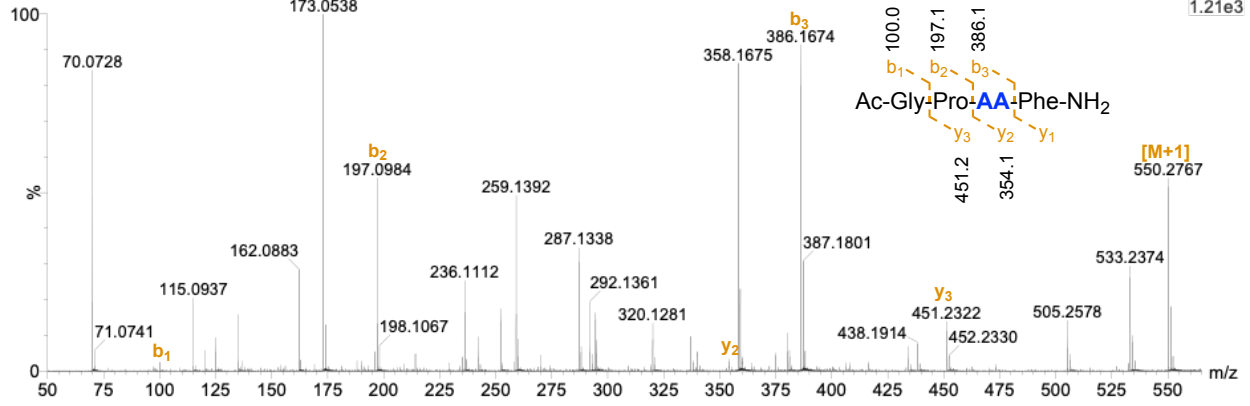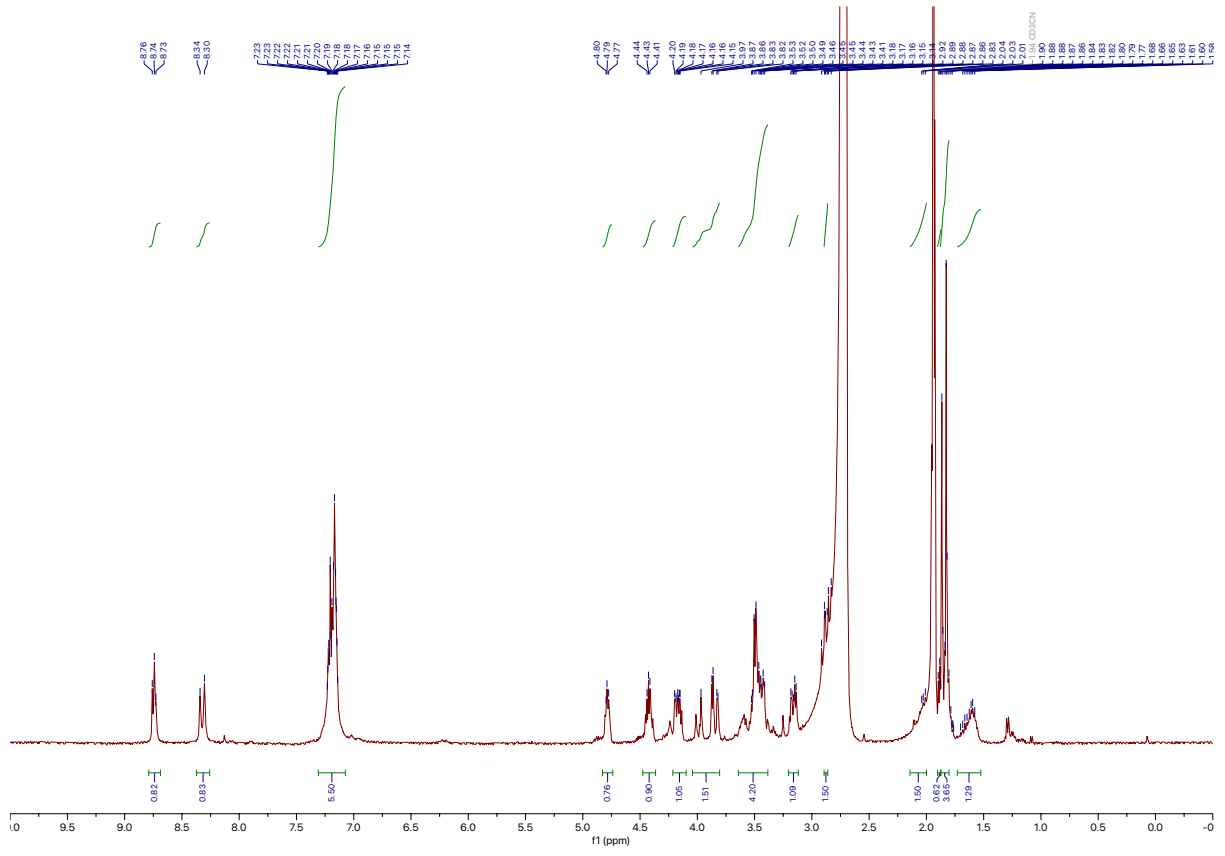

**12:** Synthesized by the general procedure for purine sidechains

MW = 564.6, % Conversion = 84%, Isolated yield = 45% [5.9 mg]

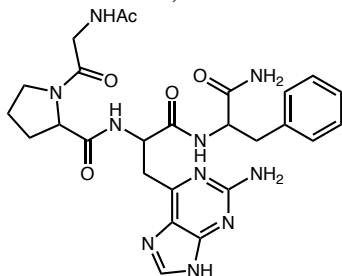

*Crude:*

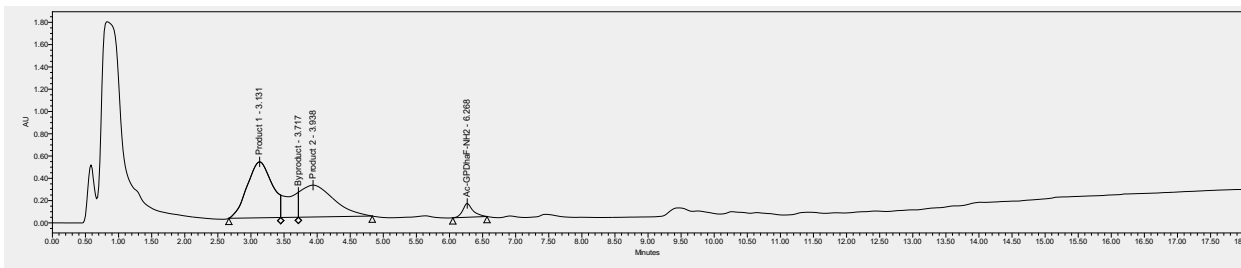

|   | Name          | Retention Time | Area     | % Area |
|---|---------------|----------------|----------|--------|
| 1 | Product 1     | 3.131          | 13122382 | 47.84  |
| 2 | Byproduct     | 3.717          | 3126040  | 11.40  |
| 3 | Product 2     | 3.938          | 9847165  | 35.90  |
| 4 | Ac-GPDhaF-NH2 | 6.268          | 1333837  | 4.86   |

*Isolated Epimers:*

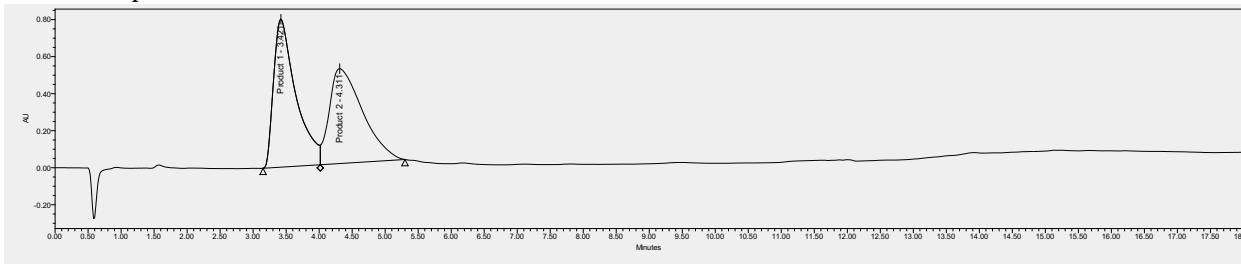

|   | Name      | Retention Time | Area     | % Area |
|---|-----------|----------------|----------|--------|
| 1 | Product 1 | 3.421          | 18736309 | 51.07  |
| 2 | Product 2 | 4.311          | 17953852 | 48.93  |

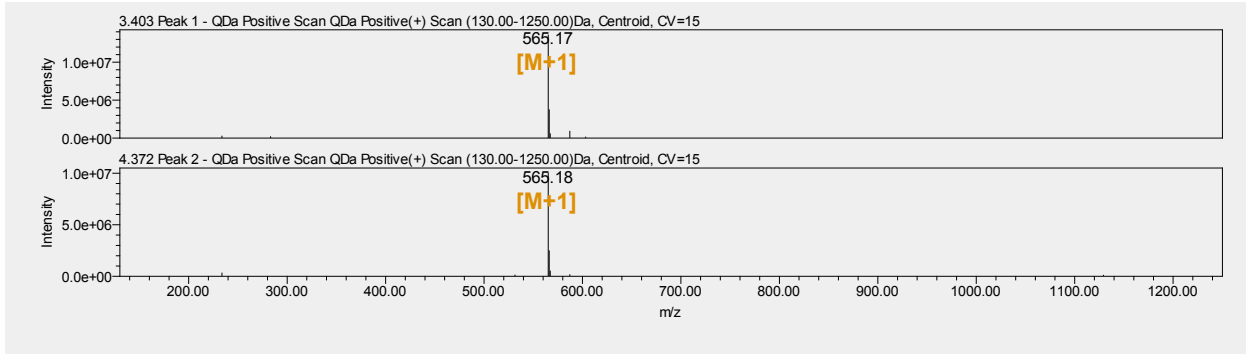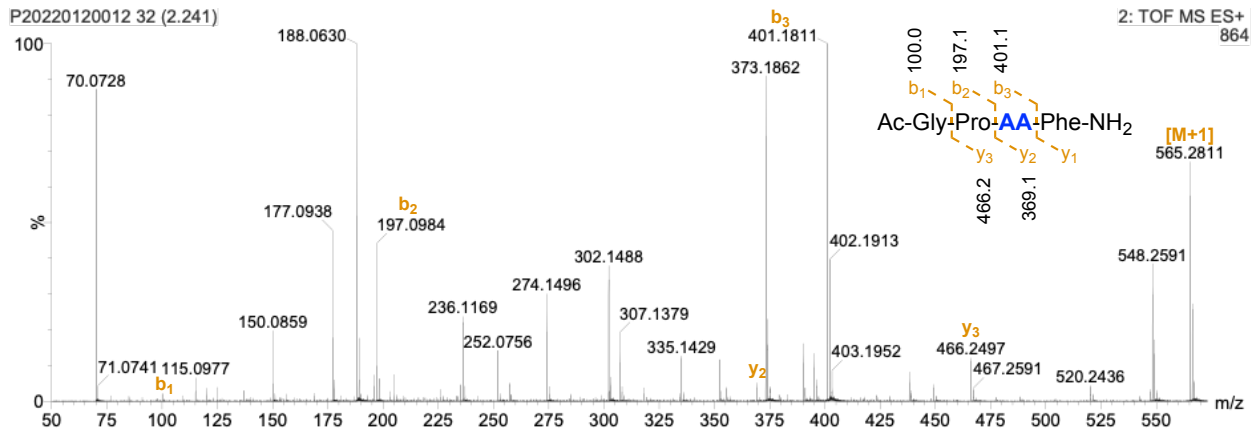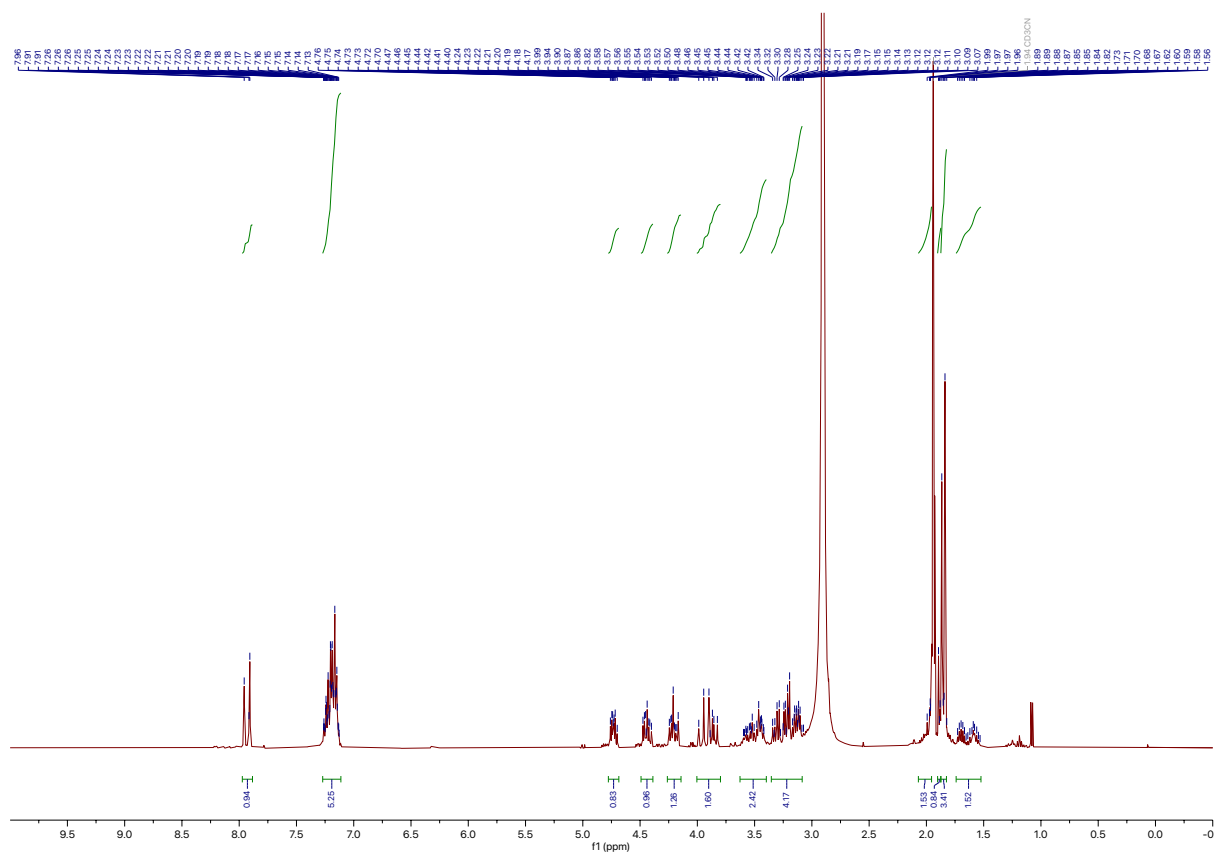

### 13: Synthesized by the general procedure for purine sidechains

MW = 548.6, % Conversion = 85%, Isolated yield = 48% [6.1 mg]

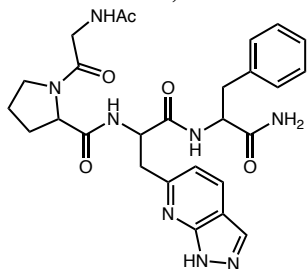

#### Crude:

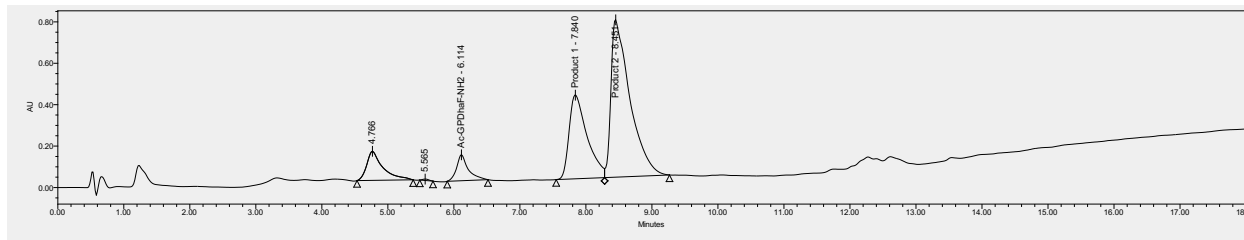

|   | Name          | Retention Time | Area     | % Area |
|---|---------------|----------------|----------|--------|
| 1 |               | 4.766          | 2388288  | 8.94   |
| 2 |               | 5.565          | 44793    | 0.17   |
| 3 | Ac-GPDhaF-NH2 | 6.114          | 1528740  | 5.72   |
| 4 | Product 1     | 7.840          | 7641600  | 28.61  |
| 5 | Product 2     | 8.451          | 15108236 | 56.56  |

#### Isolated Epimers:

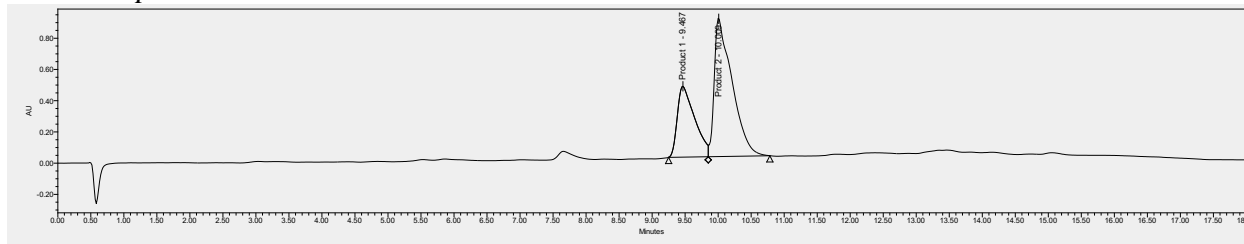

|   | Name      | Retention Time | Area     | % Area |
|---|-----------|----------------|----------|--------|
| 1 | Product 1 | 9.467          | 8271847  | 33.26  |
| 2 | Product 2 | 10.009         | 16601806 | 66.74  |

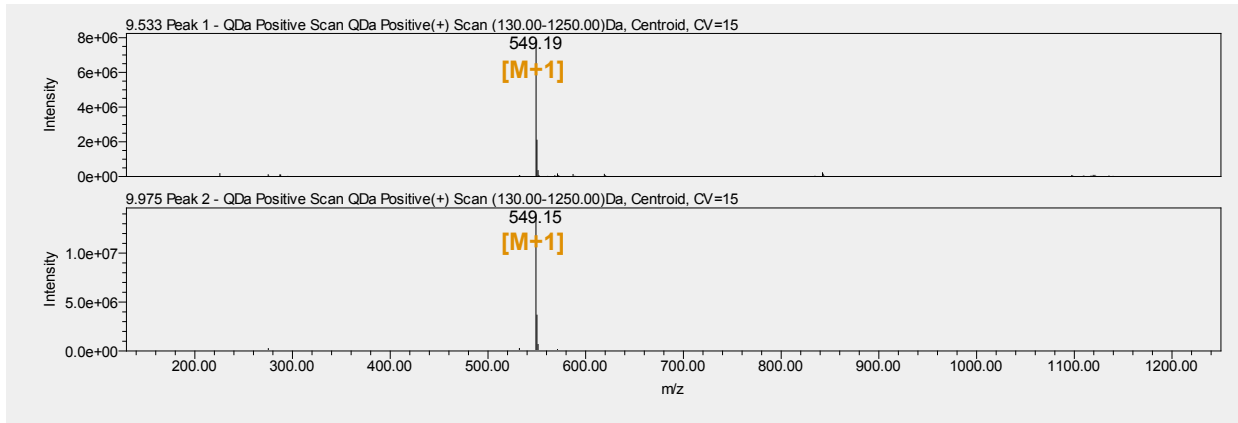

P20220120013 42 (2.940) 2: TOF MS ES+  
1.81e3

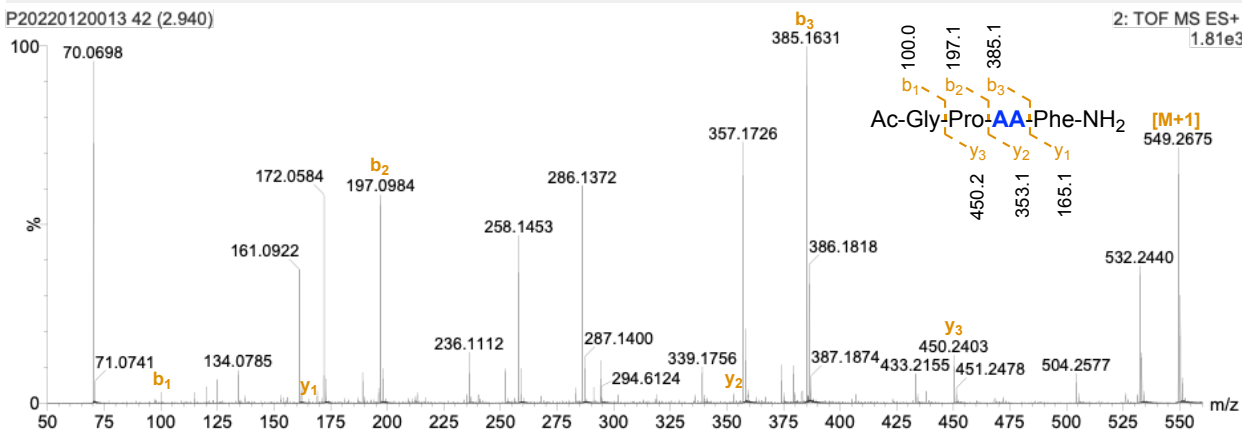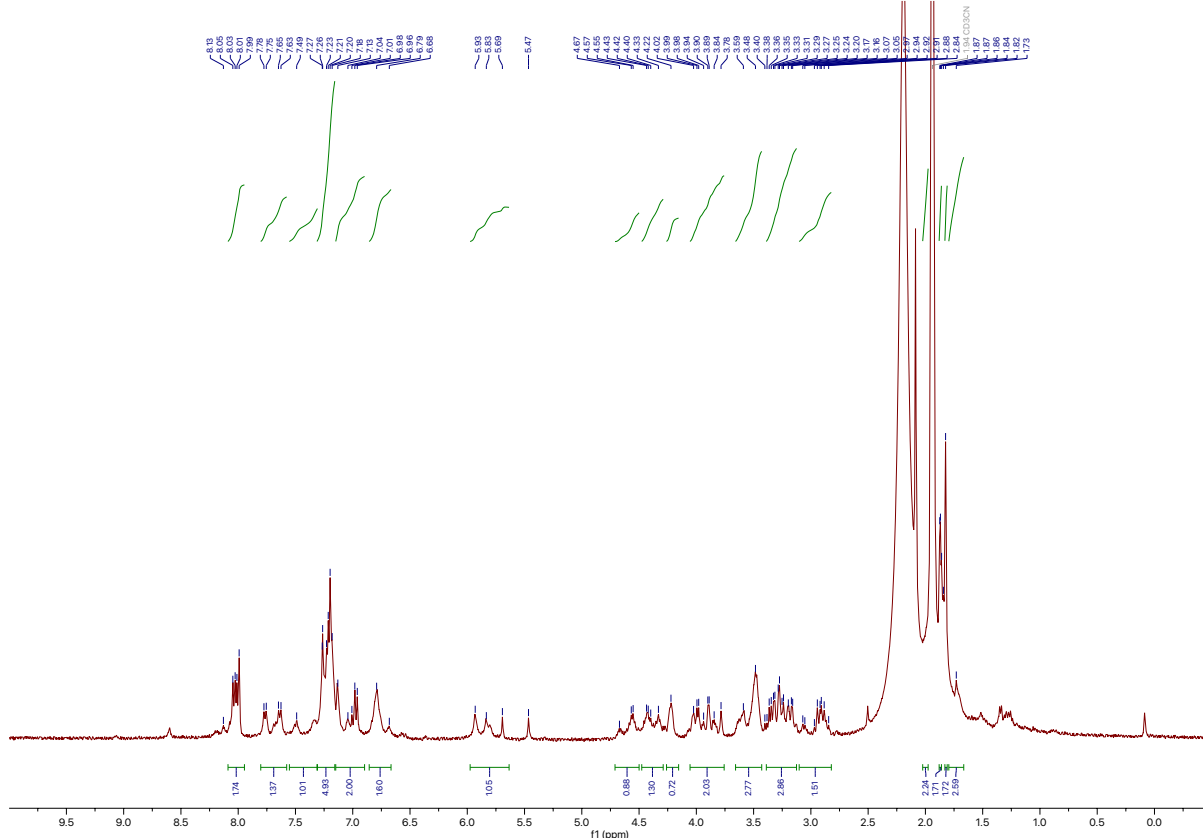



## 14: Synthesized by the general procedure for purine sidechains with deviation 2

MW = 548.6, % Conversion = 41%, Isolated yield = 27% [3.5 mg]

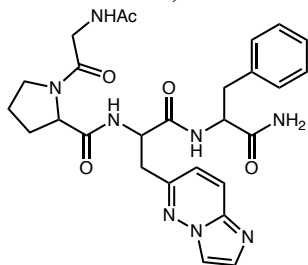

Crude:

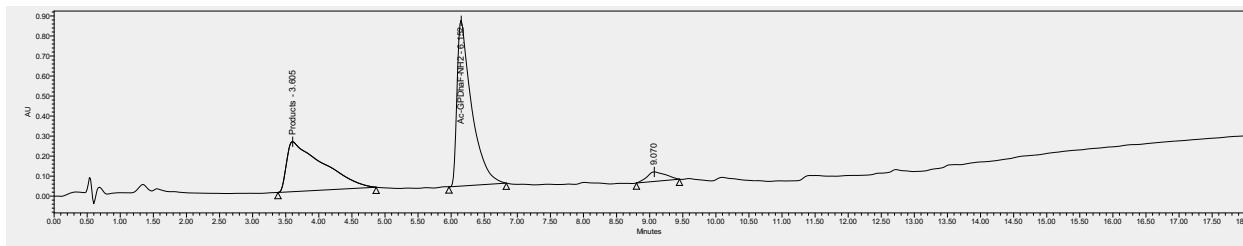

|   | Name          | Retention Time | Area     | % Area |
|---|---------------|----------------|----------|--------|
| 1 | Products      | 3.605          | 9379878  | 40.85  |
| 2 | Ac-GPDhaF-NH2 | 6.152          | 12653953 | 55.11  |
| 3 |               | 9.070          | 927843   | 4.04   |

Isolated Epimers:

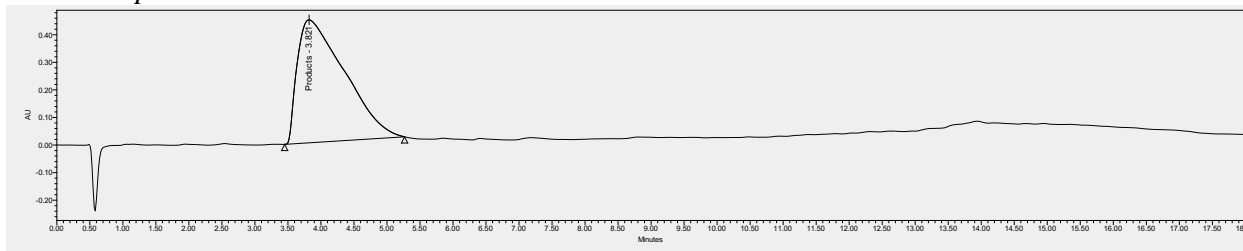

|   | Name     | Retention Time | Area     | % Area |
|---|----------|----------------|----------|--------|
| 1 | Products | 3.821          | 22070976 | 100.00 |

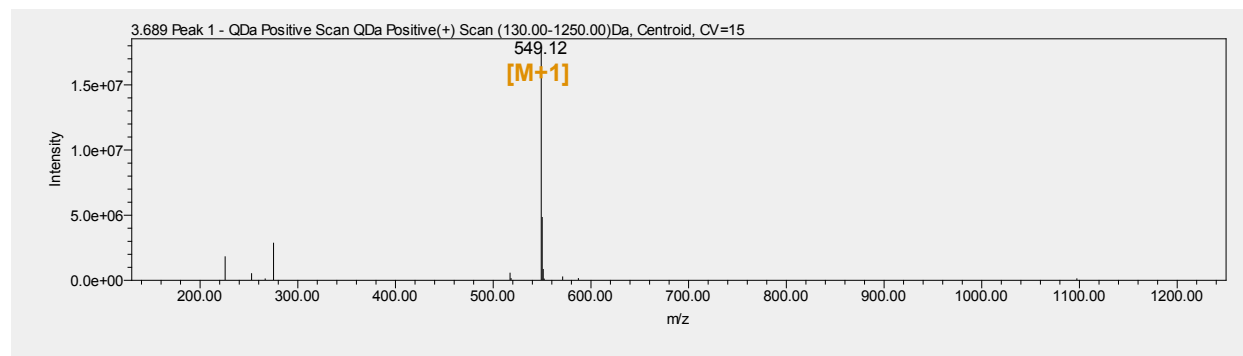

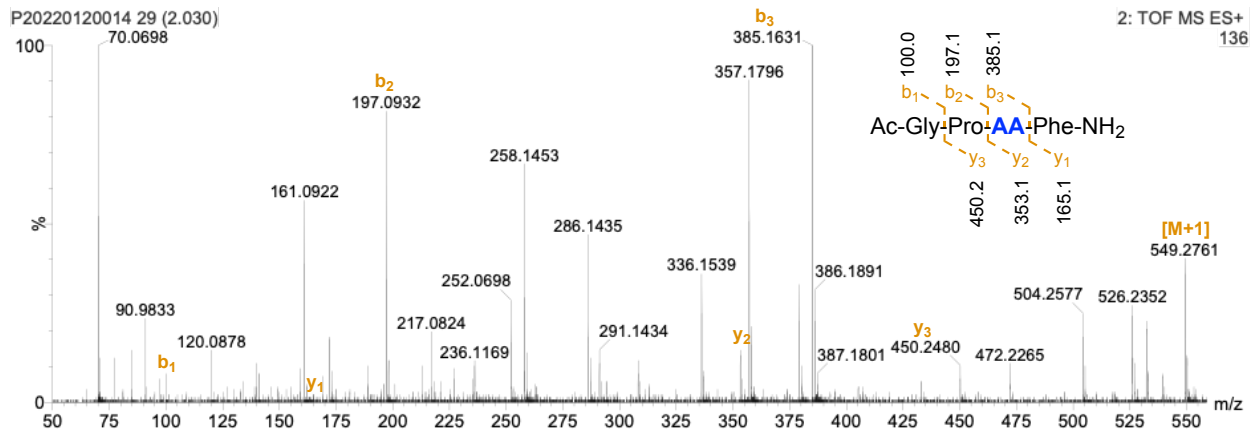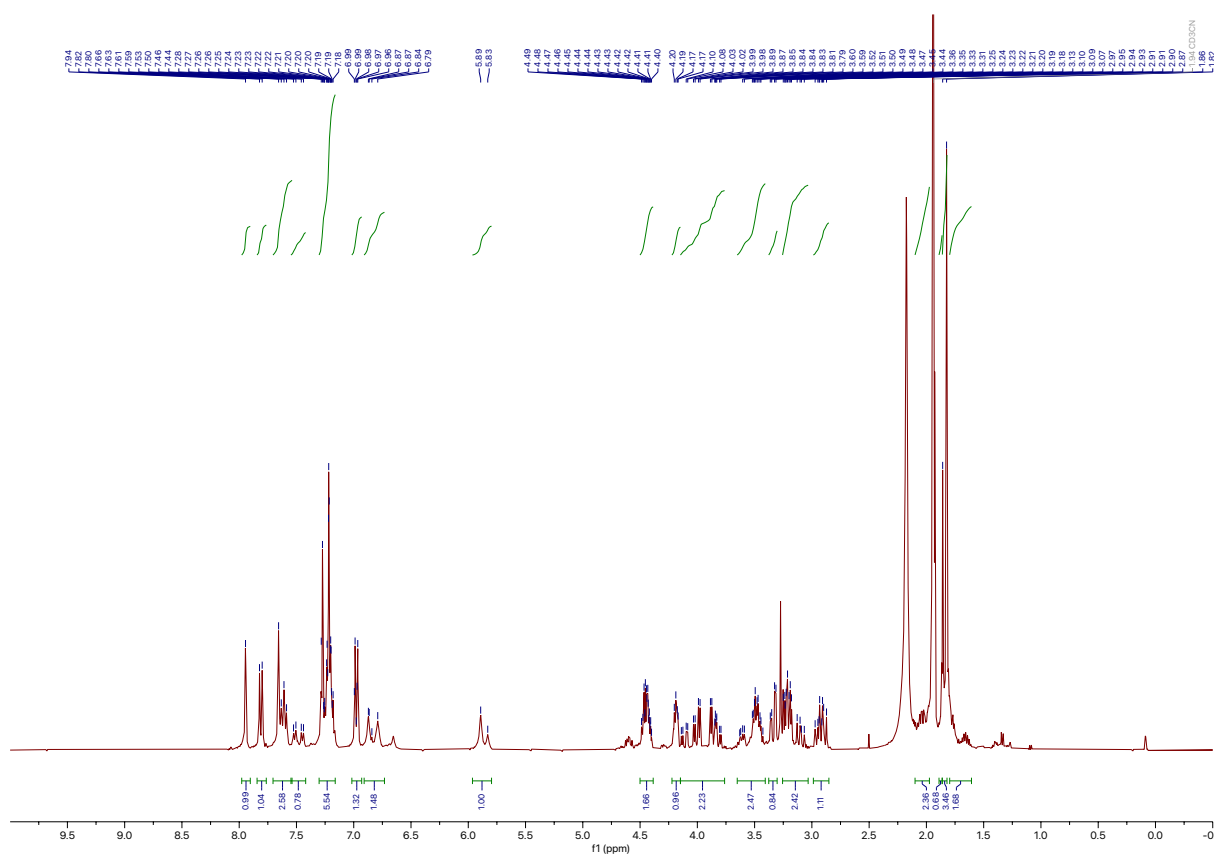

**15:** Synthesized by the general procedure for purine sidechains with **deviation 2**

MW = 548.6, % Conversion = 37%, Isolated yield = 24% [3.1 mg]

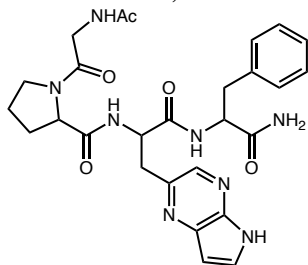

*Crude:*

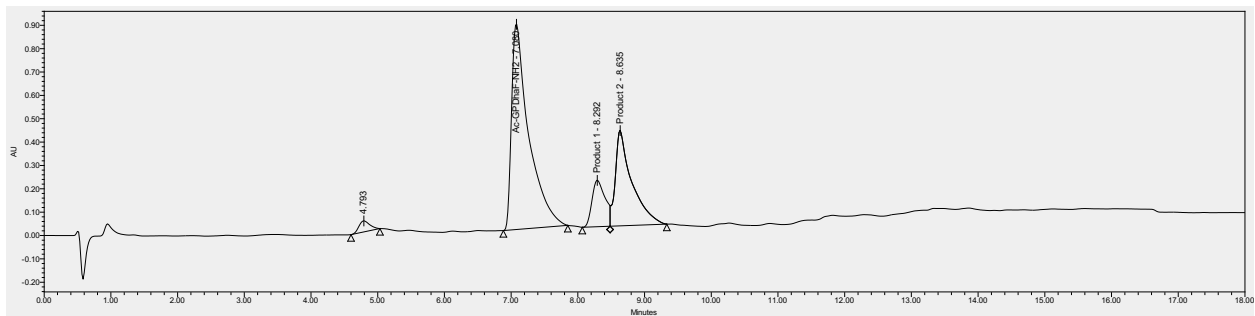

|   | Name          | Retention Time | Area     | % Area |
|---|---------------|----------------|----------|--------|
| 1 |               | 4.793          | 539210   | 2.07   |
| 2 | Ac-GPDhaF-NH2 | 7.080          | 15750030 | 60.54  |
| 3 | Product 1     | 8.292          | 2705191  | 10.40  |
| 4 | Product 2     | 8.635          | 7020994  | 26.99  |

*Isolated Epimers:*

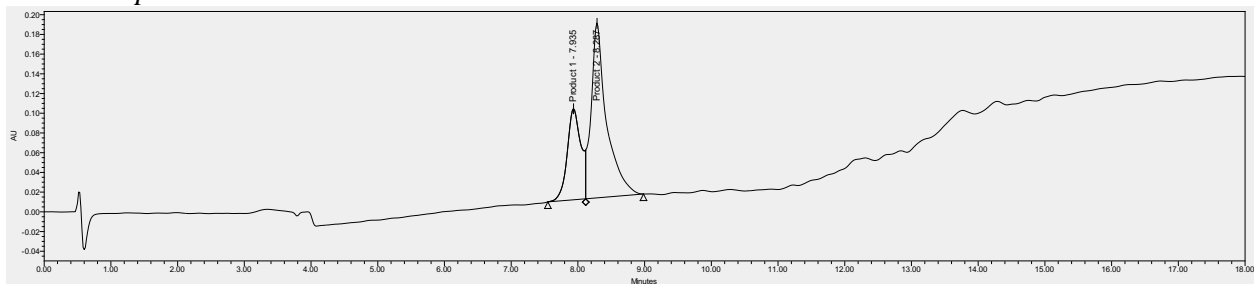

|   | Name      | Retention Time | Area    | % Area |
|---|-----------|----------------|---------|--------|
| 1 | Product 1 | 7.935          | 1323194 | 31.67  |
| 2 | Product 2 | 8.287          | 2854790 | 68.33  |

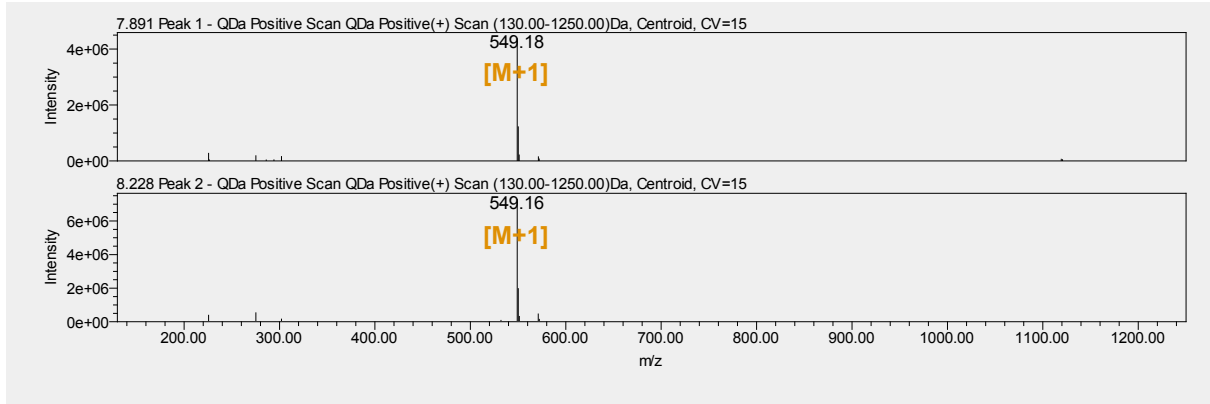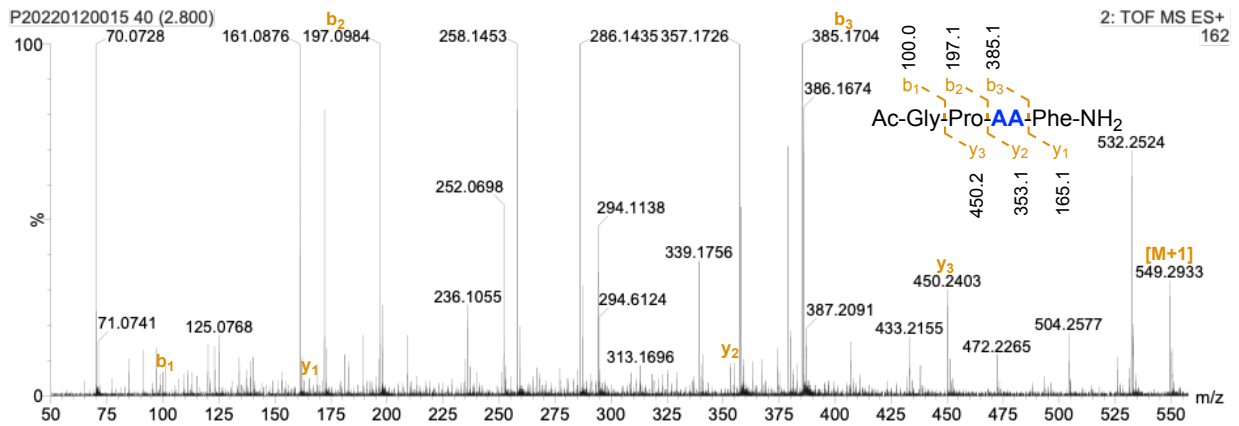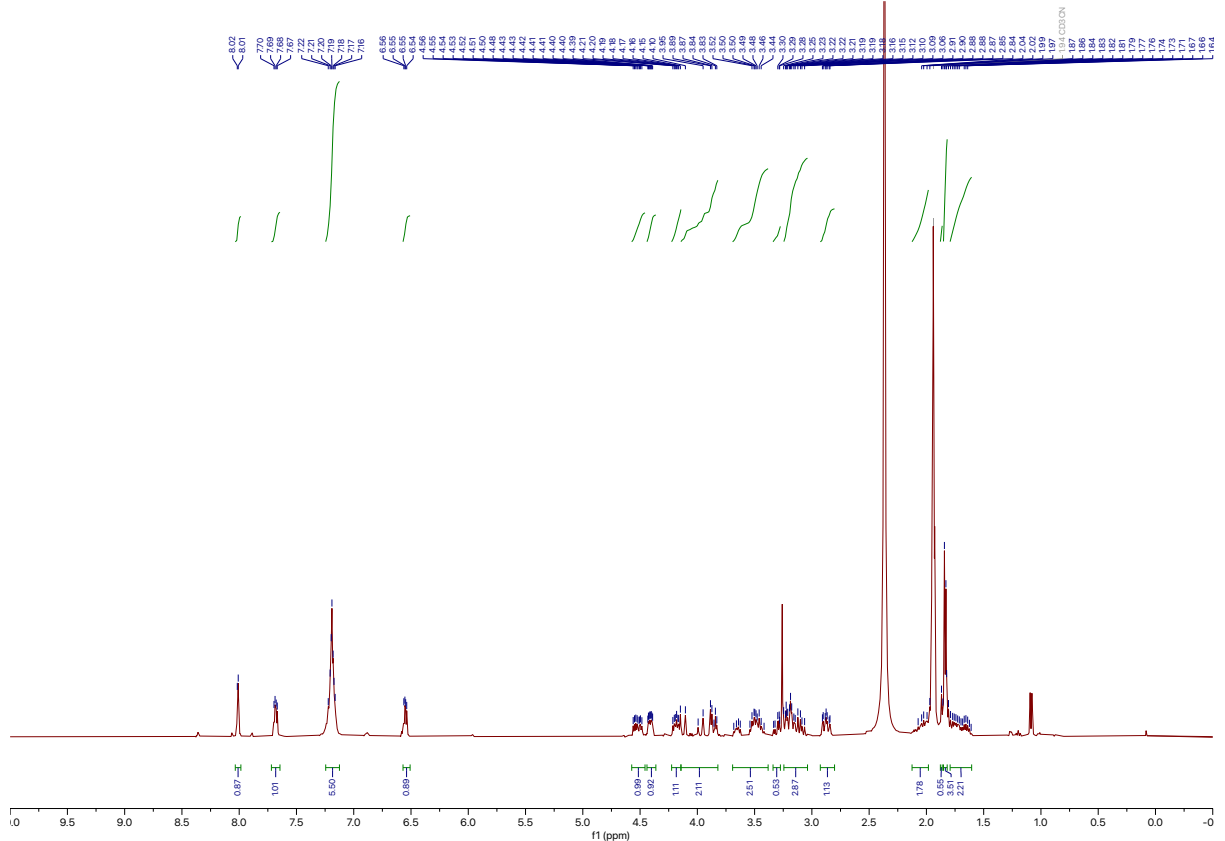

**16:** Synthesized by the general procedure for purine sidechains (**with 4 mol% Rhodamine B**)

MW = 583.0, % Conversion = 8%, Isolated yield = Not isolated.

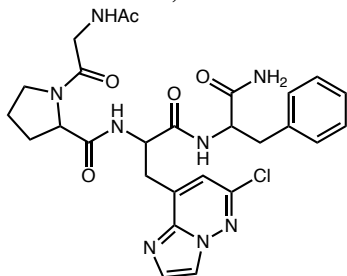

Crude:

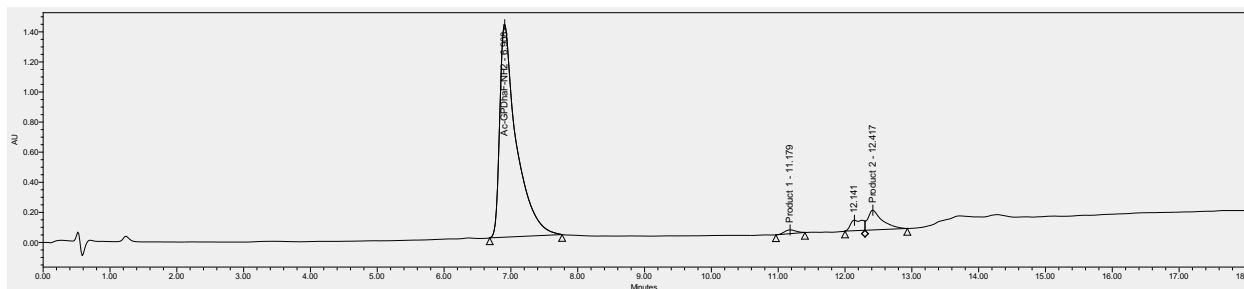

|   | Name          | Retention Time | Area     | % Area |
|---|---------------|----------------|----------|--------|
| 1 | Ac-GPDhaF-NH2 | 6.908          | 24238288 | 88.46  |
| 2 | Product 1     | 11.179         | 297686   | 1.09   |
| 3 |               | 12.141         | 907696   | 3.31   |
| 4 | Product 2     | 12.417         | 1956828  | 7.14   |

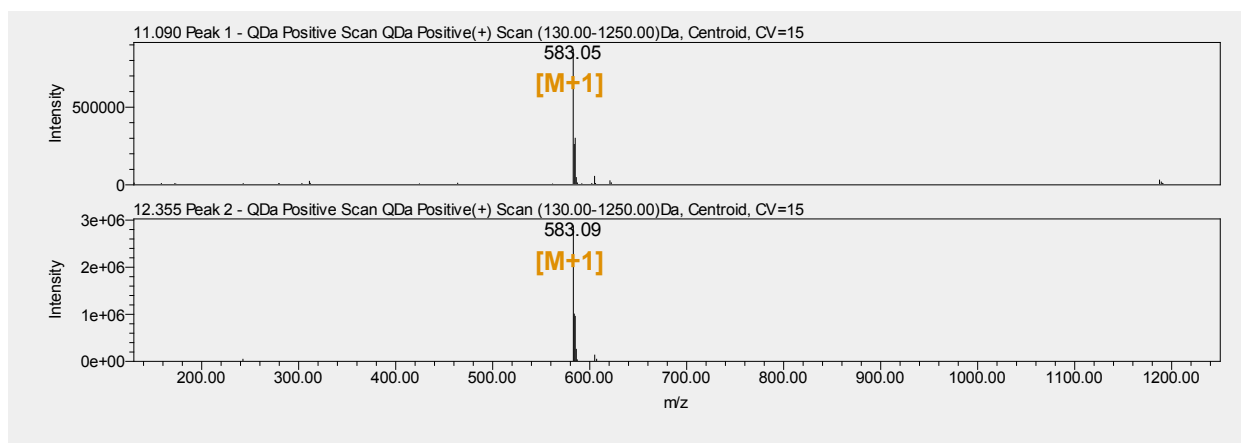

**17:** Synthesized by the general procedure for purine sidechains with **deviation 1**

MW = 564.6, % Conversion = 10%, Isolated yield = Not isolated.

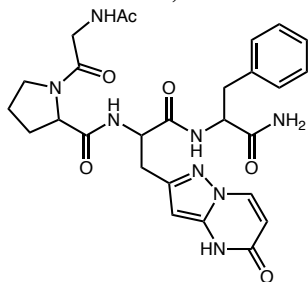

*Crude:*

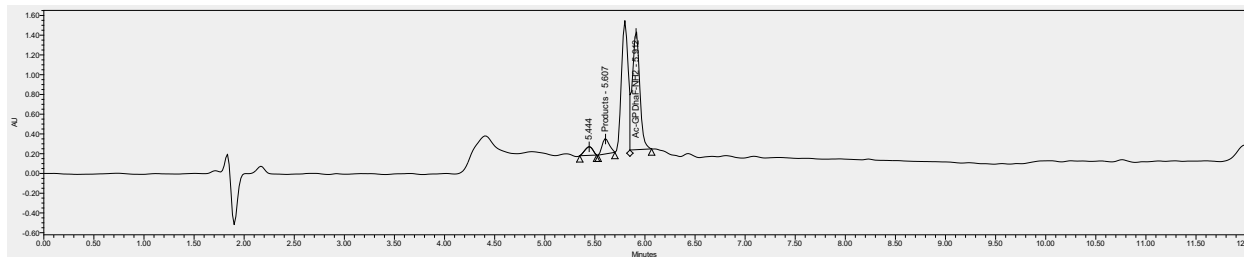

|   | Name          | Retention Time | Area    | % Area |
|---|---------------|----------------|---------|--------|
| 1 |               | 5.444          | 486082  | 6.49   |
| 2 | Products      | 5.607          | 772545  | 10.32  |
| 3 | Ac-GPDhaF-NH2 | 5.912          | 6226989 | 83.19  |

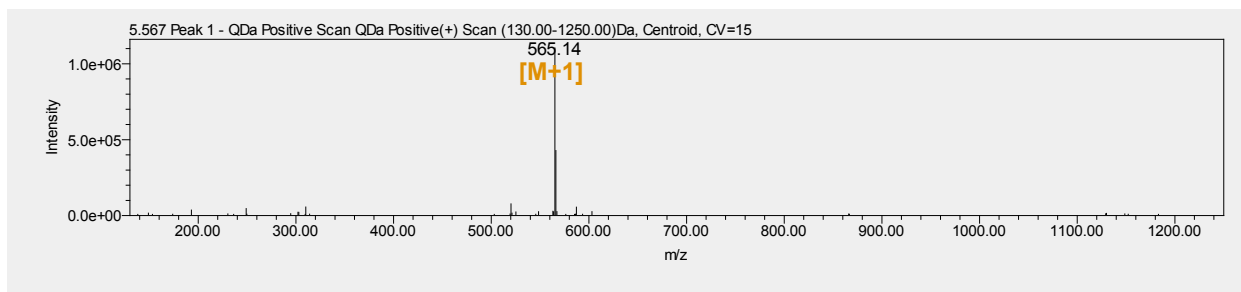

**18:** Synthesized by the general procedure for purine sidechains with **deviation 1**

MW = 549.6, % Conversion = 8%, Isolated yield = Not isolated.

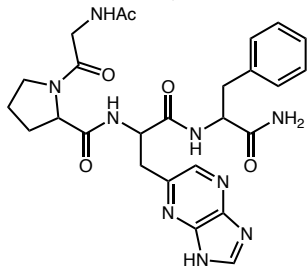

*Crude:*

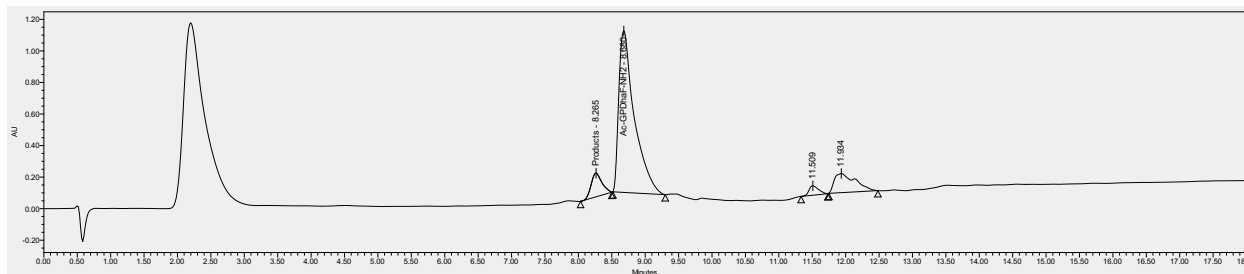

|   | Name          | Retention Time | Area     | % Area |
|---|---------------|----------------|----------|--------|
| 1 | Products      | 8.265          | 1698284  | 7.90   |
| 2 | Ac-GPDhaF-NH2 | 8.680          | 16555388 | 77.03  |
| 3 |               | 11.509         | 596003   | 2.77   |
| 4 |               | 11.934         | 2641084  | 12.29  |

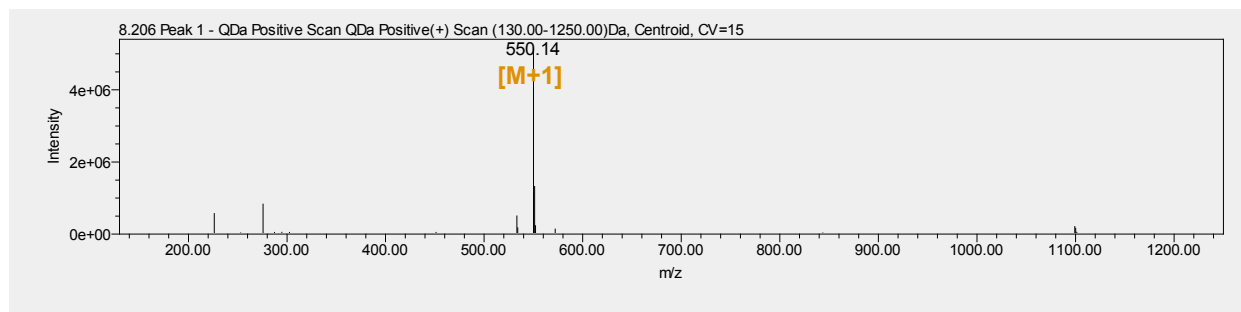

**19:** Synthesized by the general procedure for pyrimidine sidechains with **deviation 1**

MW = 549.6, % Conversion = 54%, Isolated yield = 40% [5.1 mg]

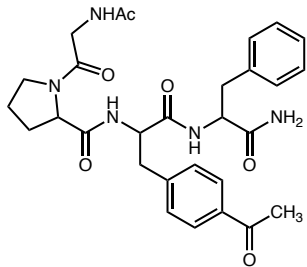

*Crude:*

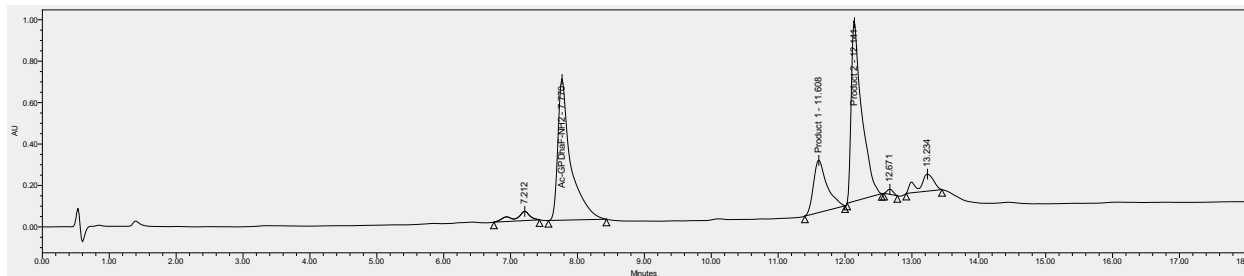

|   | Name          | Retention Time | Area    | % Area |
|---|---------------|----------------|---------|--------|
| 1 |               | 7.212          | 706465  | 2.91   |
| 2 | Ac-GPDhaF-NH2 | 7.770          | 9102381 | 37.50  |
| 3 | Product 1     | 11.608         | 3555460 | 14.65  |
| 4 | Product 2     | 12.141         | 9505369 | 39.16  |
| 5 |               | 12.671         | 152757  | 0.63   |
| 6 |               | 13.234         | 1251006 | 5.15   |

*Isolated Epimers:*

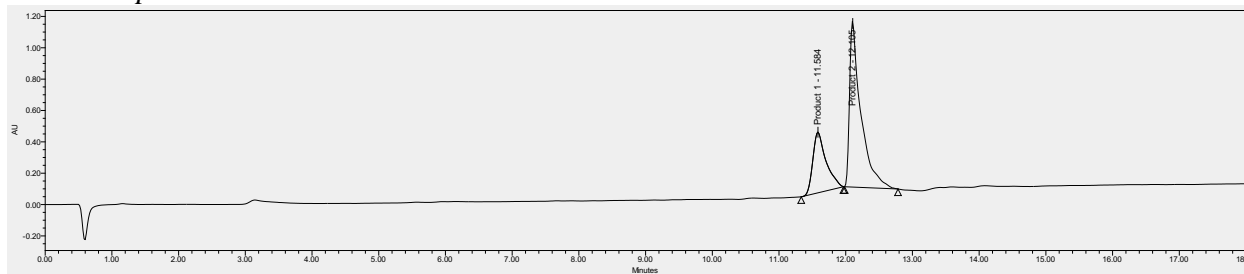

|   | Name      | Retention Time | Area     | % Area |
|---|-----------|----------------|----------|--------|
| 1 | Product 1 | 11.584         | 5354157  | 30.12  |
| 2 | Product 2 | 12.105         | 12423517 | 69.88  |



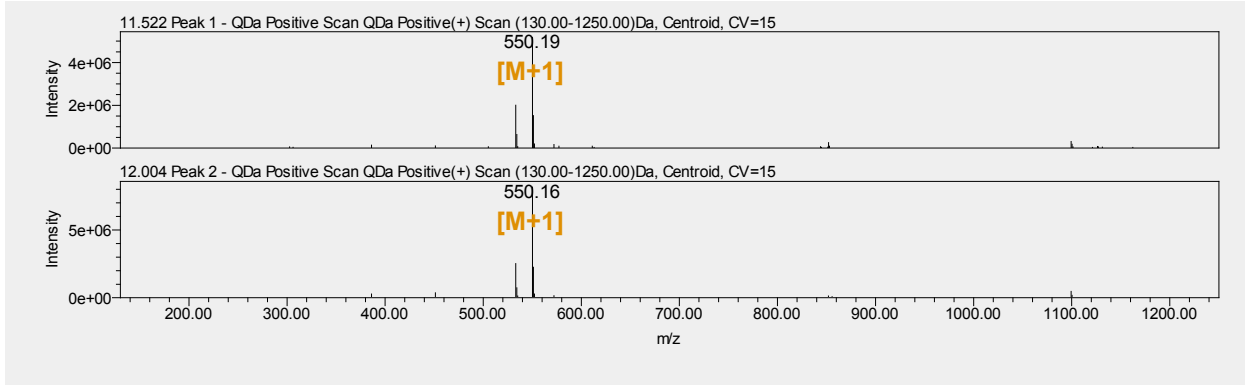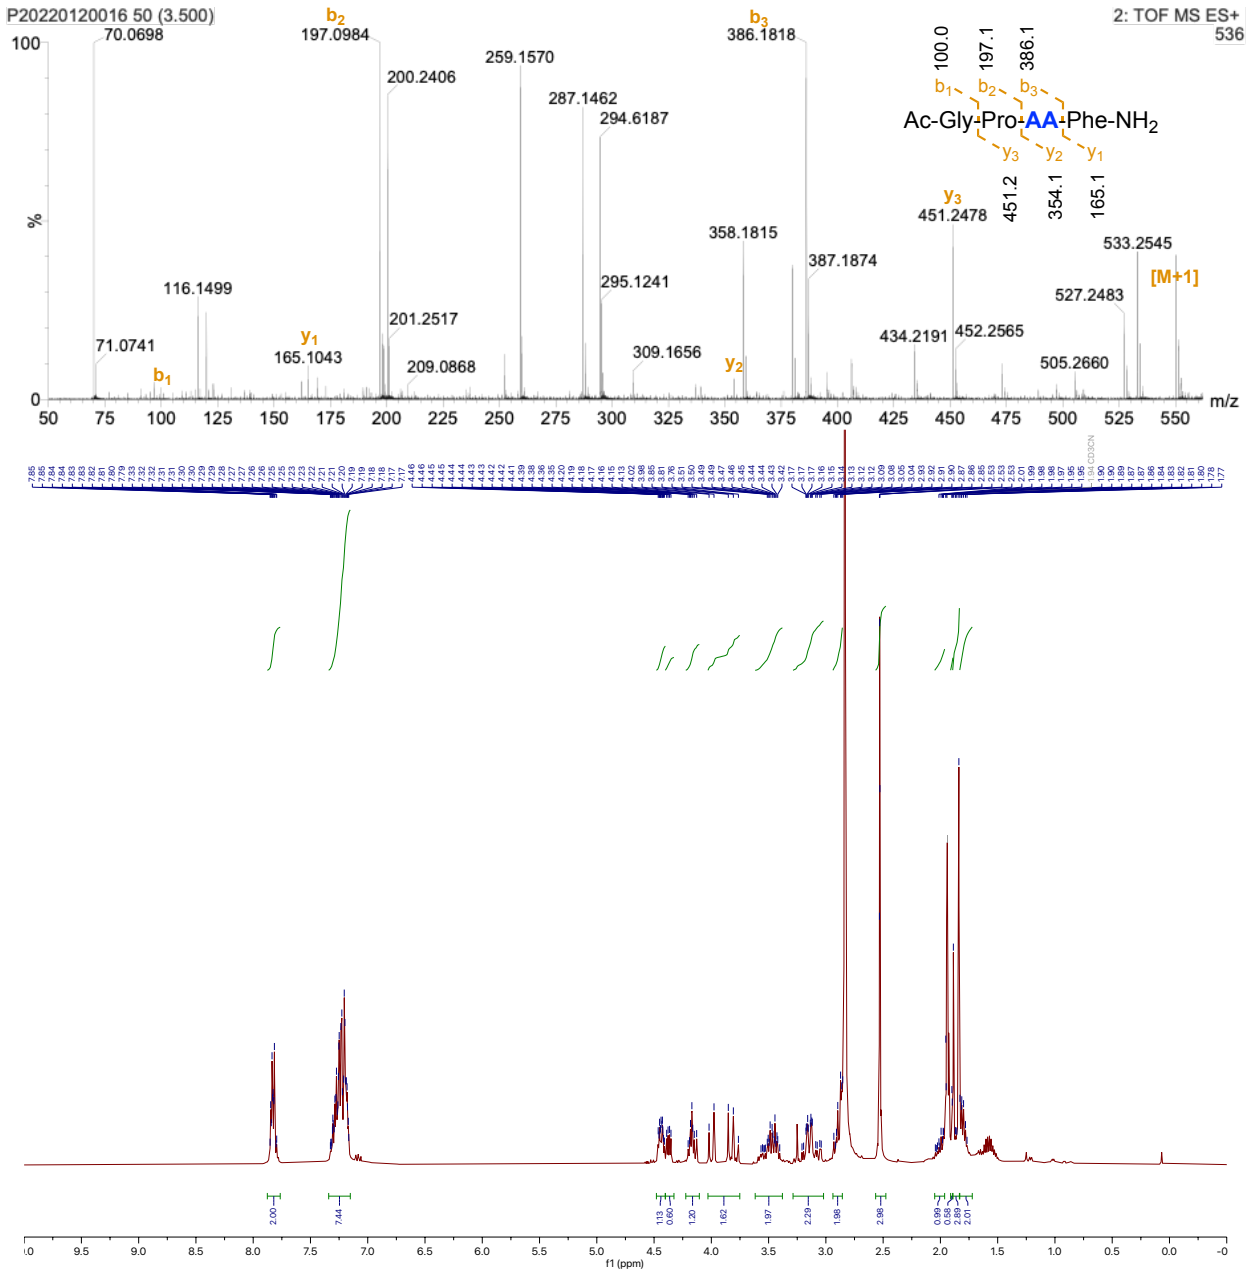

**20:** Synthesized by the general procedure for pyrimidine sidechains with **deviation 1**

MW = 535.6, % Conversion = 20%, Isolated yield = 15% [1.9 mg]

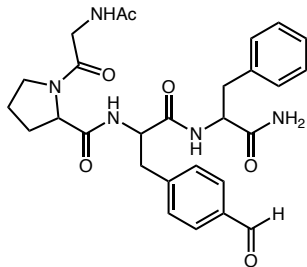

*Crude:*

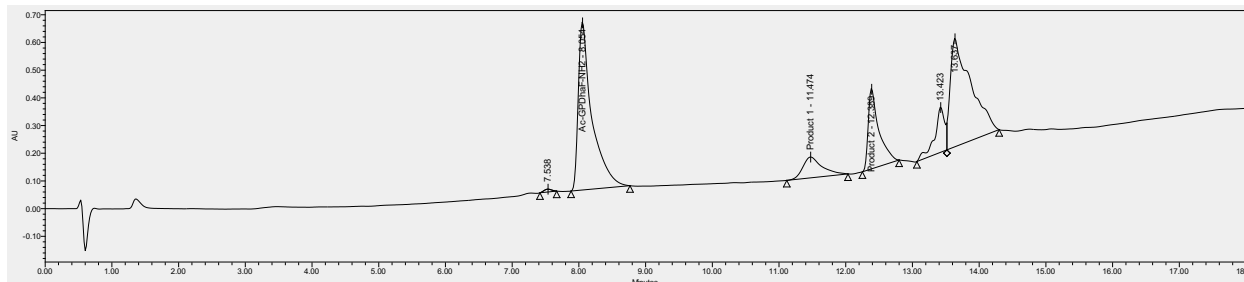

|   | Name          | Retention Time | Area    | % Area |
|---|---------------|----------------|---------|--------|
| 1 |               | 7.538          | 83138   | 0.35   |
| 2 | Ac-GPDhaF-NH2 | 8.054          | 8609978 | 36.66  |
| 3 | Product 1     | 11.474         | 1517470 | 6.46   |
| 4 | Product 2     | 12.389         | 3224650 | 13.73  |
| 5 |               | 13.423         | 1709371 | 7.28   |
| 6 |               | 13.637         | 8343618 | 35.52  |

*Isolated Epimers:*

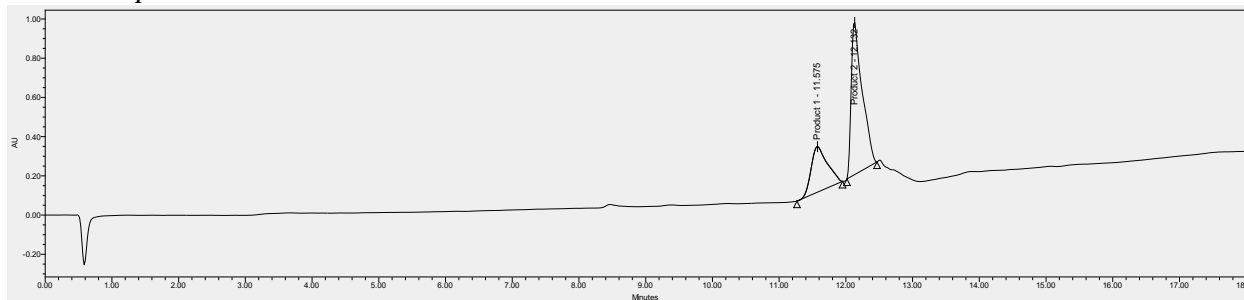

|   | Name      | Retention Time | Area    | % Area |
|---|-----------|----------------|---------|--------|
| 1 | Product 1 | 11.575         | 3916782 | 30.62  |
| 2 | Product 2 | 12.132         | 8874456 | 69.38  |

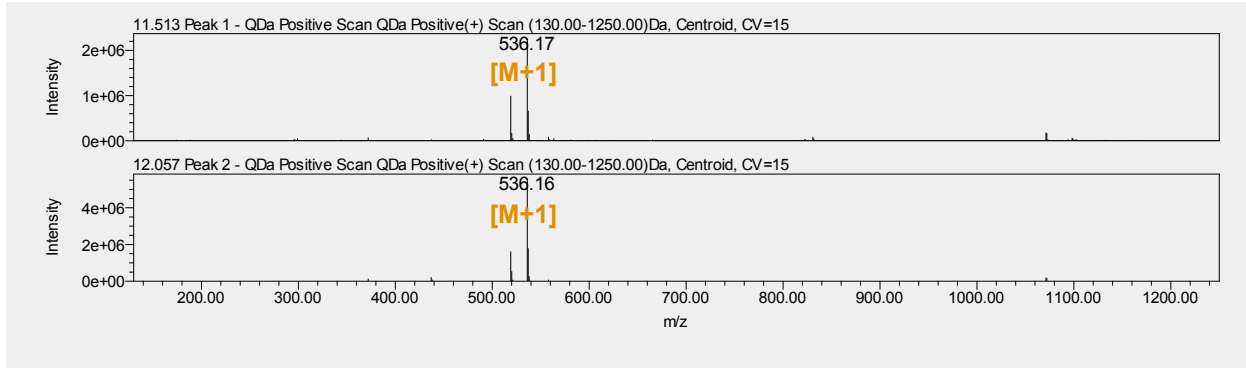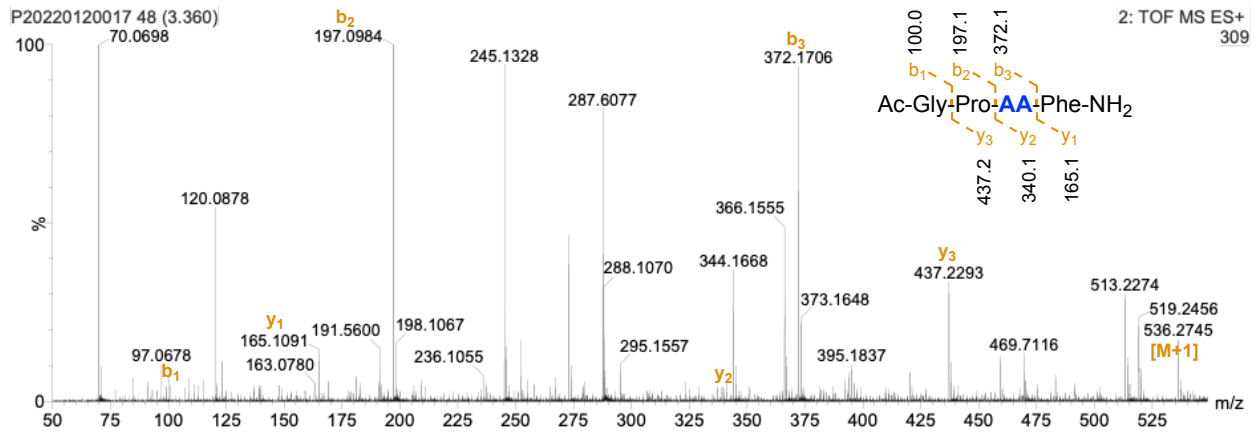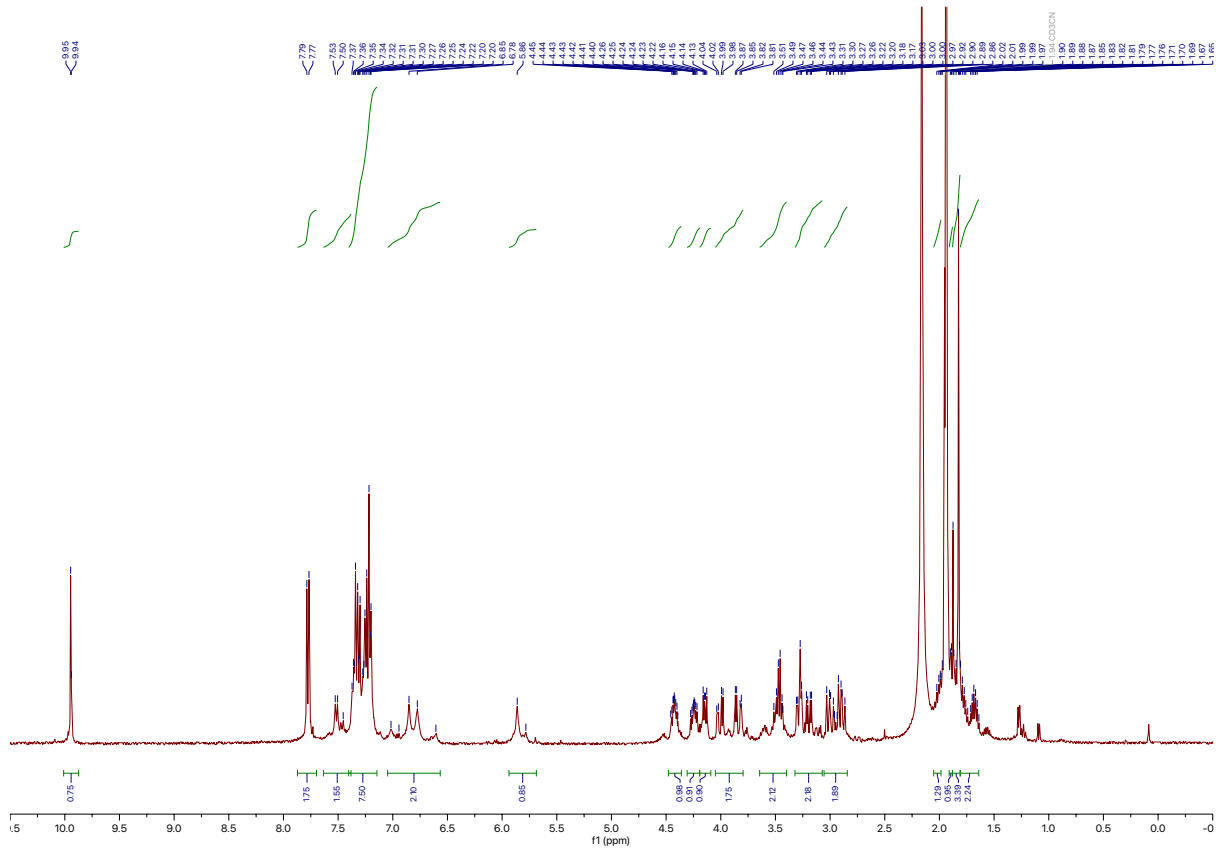

## 21: Caspase Active Site Peptide

Synthesized by the general procedure for pyrimidine sidechains with **deviation 1**

MW = 734.8, % Conversion = 90%, Isolated yield = 56% [9.6 mg]

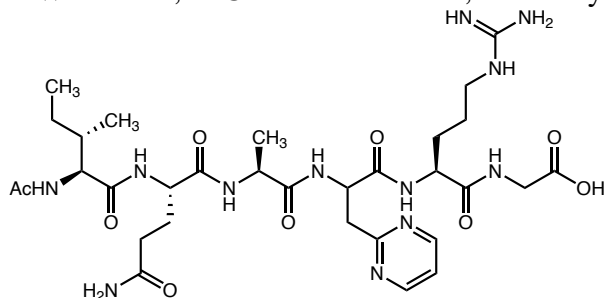

*Crude:*

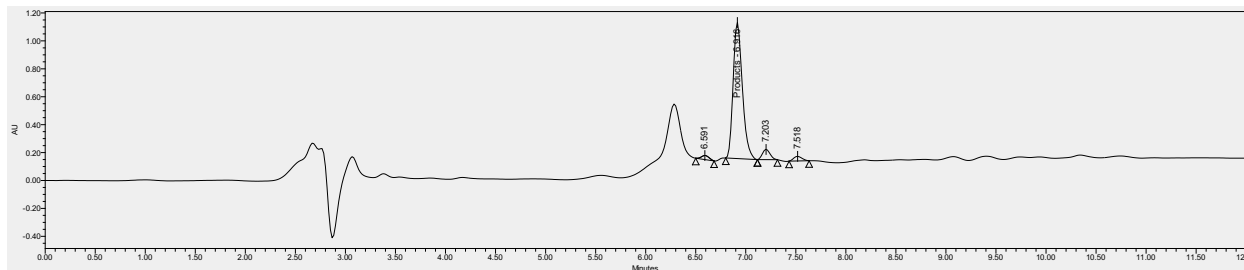

|   | Name     | Retention Time | Area    | % Area |
|---|----------|----------------|---------|--------|
| 1 |          | 6.591          | 154462  | 2.21   |
| 2 | Products | 6.916          | 6239620 | 89.46  |
| 3 |          | 7.203          | 389447  | 5.58   |
| 4 |          | 7.518          | 191448  | 2.74   |

*Isolated Epimers:*

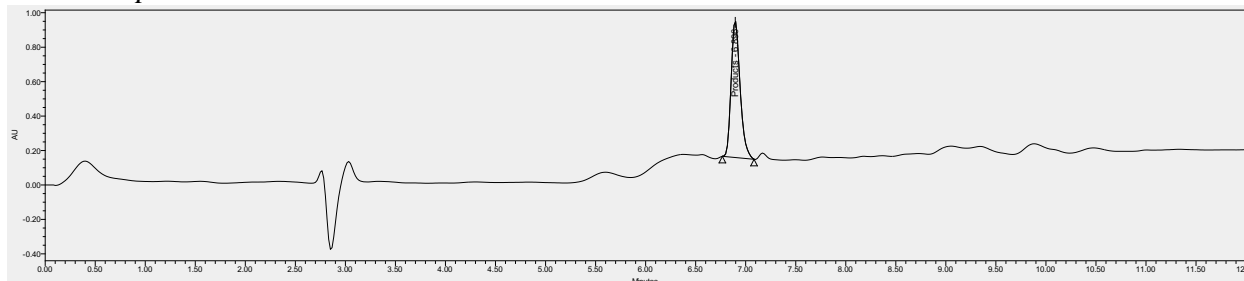

|   | Name     | Retention Time | Area    | % Area |
|---|----------|----------------|---------|--------|
| 1 | Products | 6.896          | 4948360 | 100.00 |

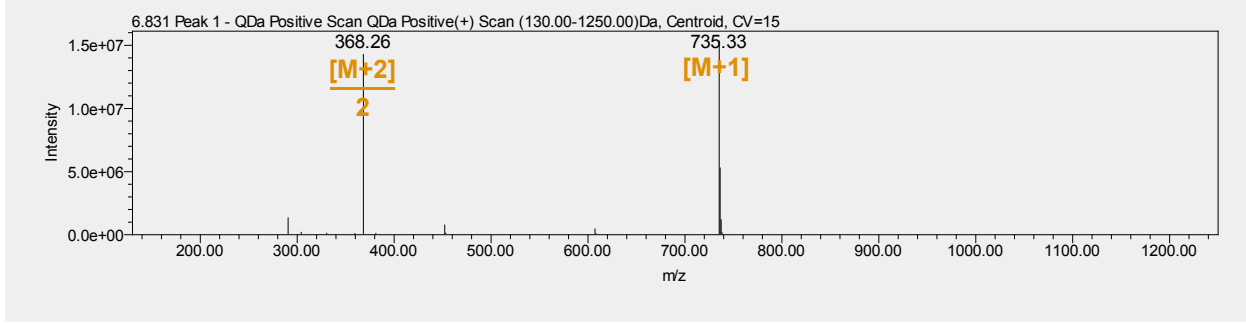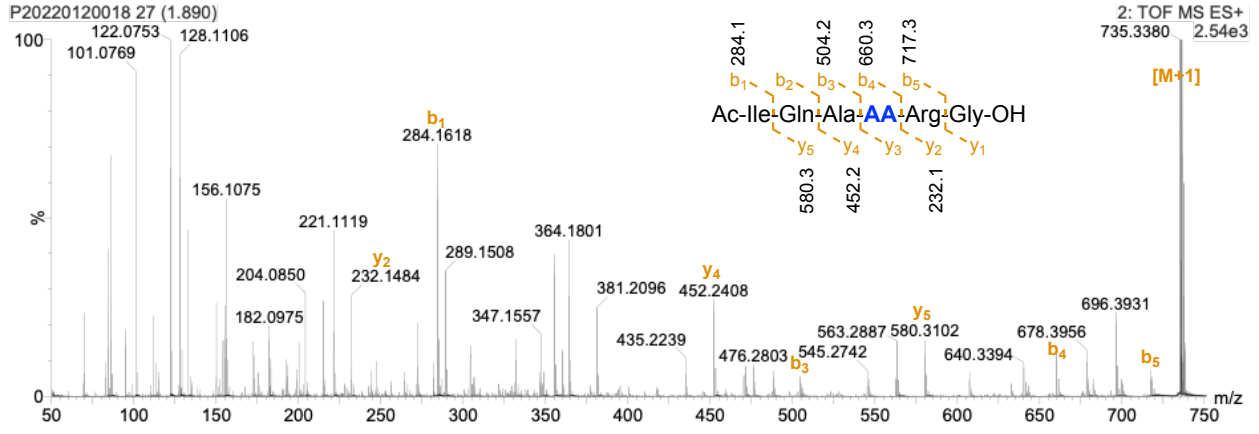

8.75  
8.74  
8.74  
7.74  
7.74  
6.50  
4.99  
4.95  
4.93  
4.92  
4.92  
4.92  
4.42  
4.40  
4.39  
4.37  
4.33  
4.31  
4.29  
4.25  
4.23  
4.23  
4.14  
4.14  
4.11  
4.10  
3.76  
3.74  
3.63  
3.51  
3.39  
3.37  
3.37  
3.21  
3.21  
3.20  
3.19  
3.18  
3.16  
2.33  
2.32  
2.07  
2.05  
2.03  
2.03  
1.97  
1.96  
1.95  
1.92  
1.92  
1.81  
1.79  
1.77  
1.75  
1.74  
1.63  
1.61  
1.60  
1.59  
1.51  
1.49  
1.48  
1.39  
1.38  
1.37  
1.36  
1.35  
1.33  
1.31  
1.24  
1.22  
1.20  
1.18  
0.93  
0.92  
0.92  
0.91  
0.89  
0.88  
0.87

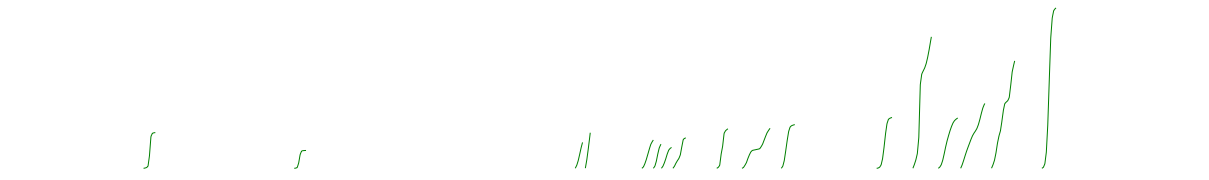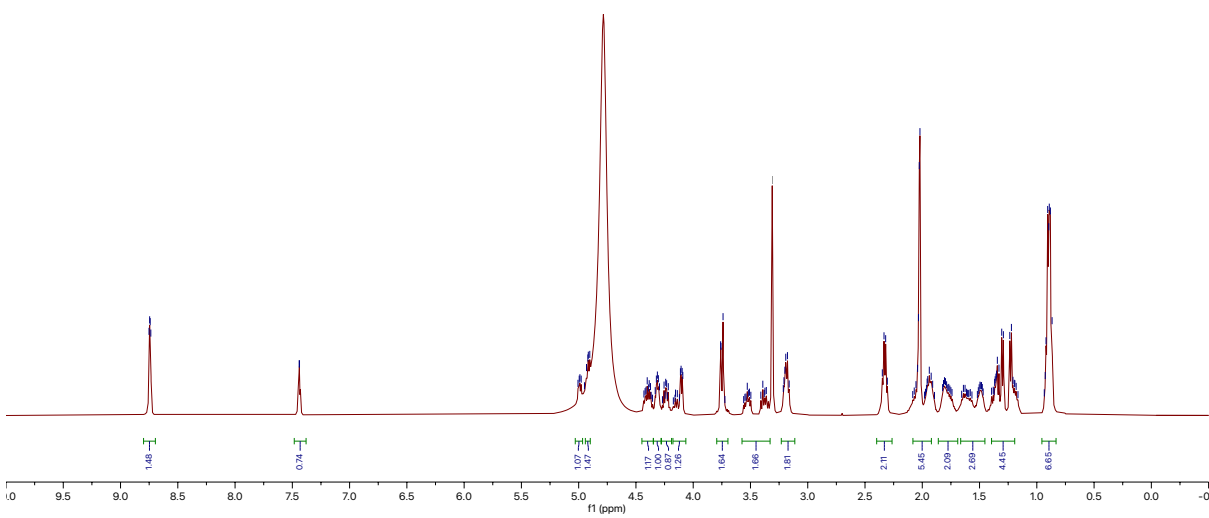

## 22: Antioxidant Peptide A

Synthesized by the general procedure for pyrimidine sidechains with **deviations 1 and 2**

MW = 817.0, % Conversion = 39%, Isolated yield = 37% [7.1 mg]

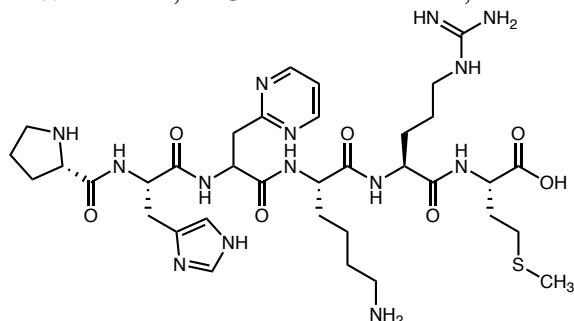

### Crude:

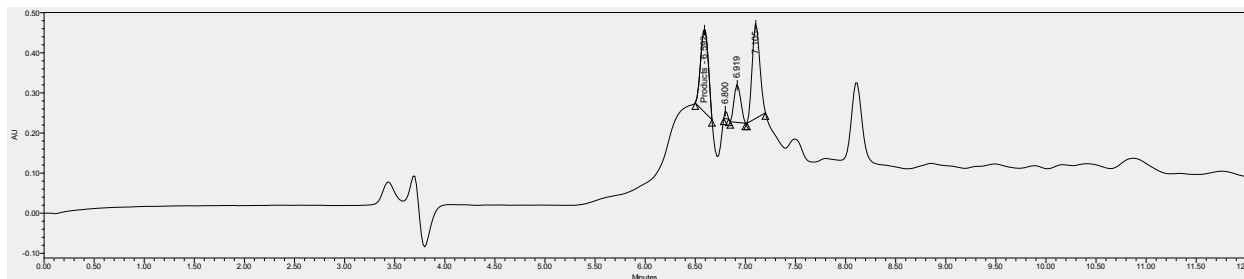

|   | Name     | Retention Time | Area    | % Area |
|---|----------|----------------|---------|--------|
| 1 | Products | 6.592          | 1102319 | 39.26  |
| 2 |          | 6.800          | 33669   | 1.20   |
| 3 |          | 6.919          | 435090  | 15.50  |
| 4 |          | 7.105          | 1236581 | 44.04  |

### Isolated Epimers:

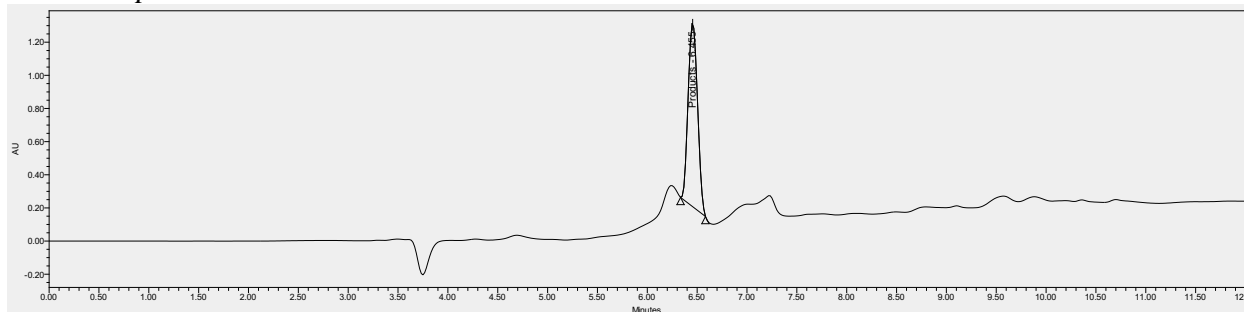

|   | Name     | Retention Time | Area    | % Area |
|---|----------|----------------|---------|--------|
| 1 | Products | 6.455          | 7253178 | 100.00 |

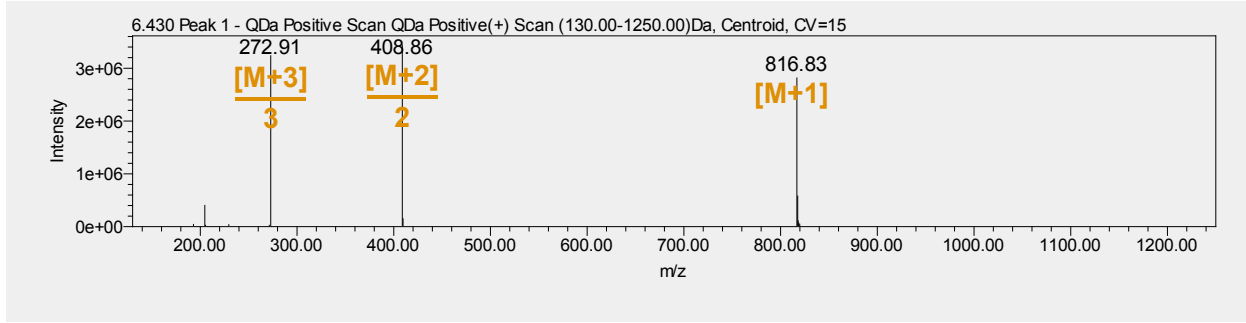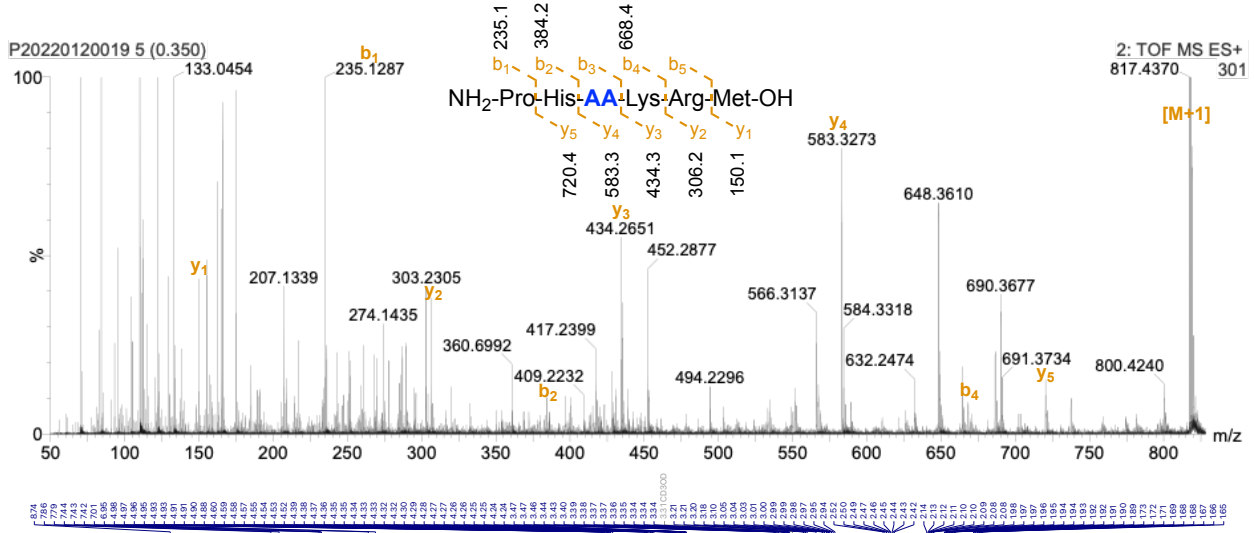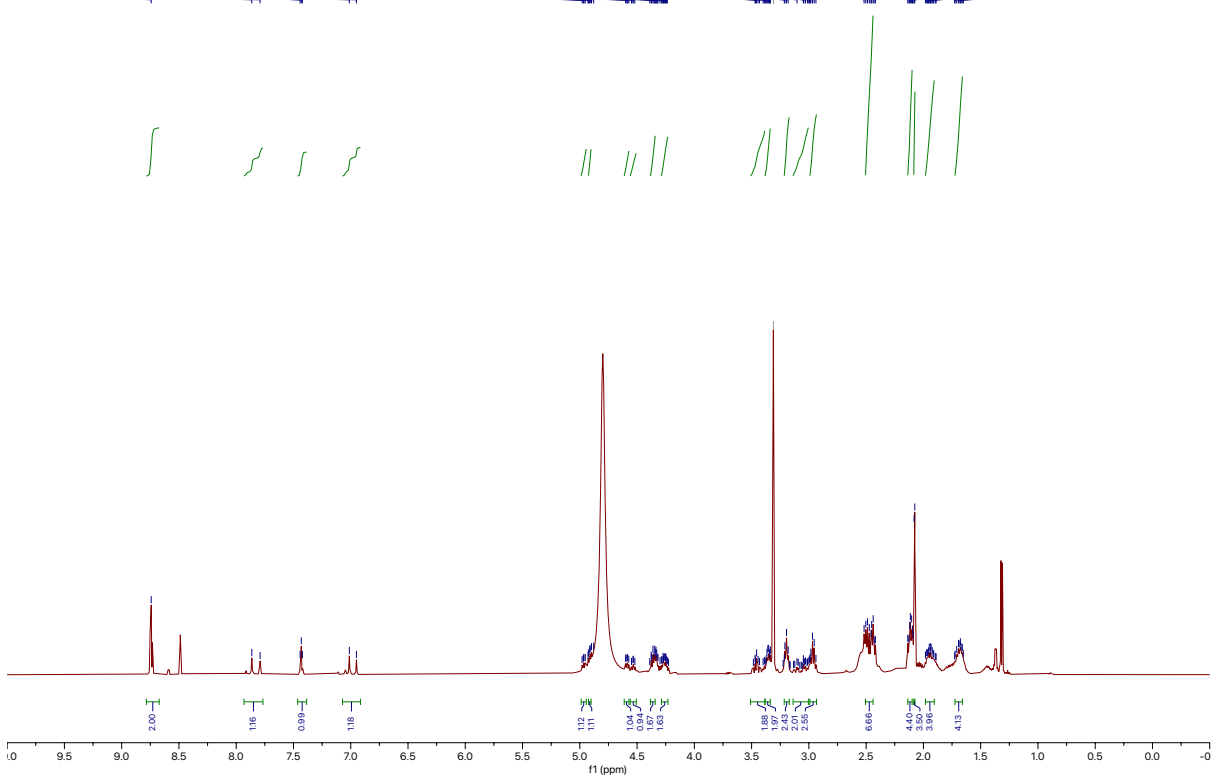

### 23: ATN-161, Integrin Inhibitor

Synthesized by the general procedure for pyrimidine sidechains with **deviation 1**

MW = 643.7, % Conversion = 93%, Isolated yield = 59% [8.8 mg]

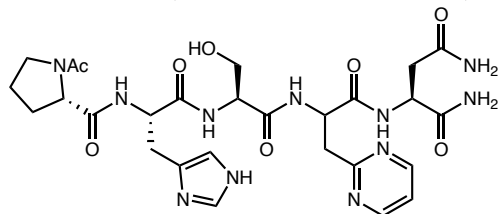

Crude:

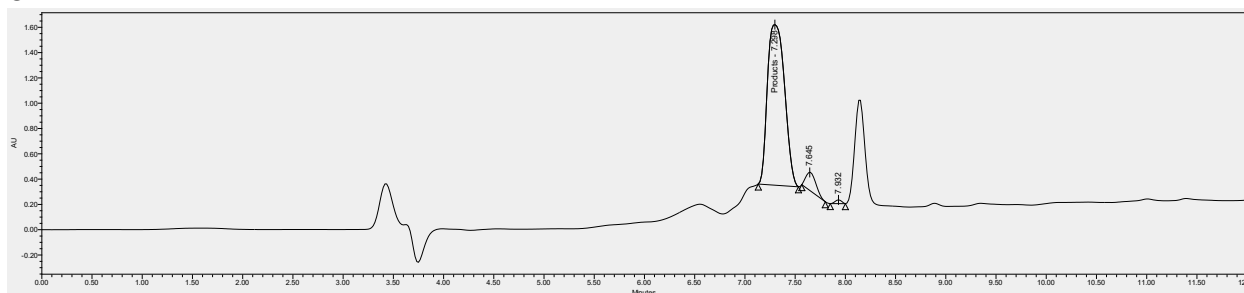

|   | Name     | Retention Time | Area     | % Area |
|---|----------|----------------|----------|--------|
| 1 | Products | 7.298          | 15091815 | 92.96  |
| 2 |          | 7.645          | 1010426  | 6.22   |
| 3 |          | 7.932          | 132746   | 0.82   |

Isolated Epimers:

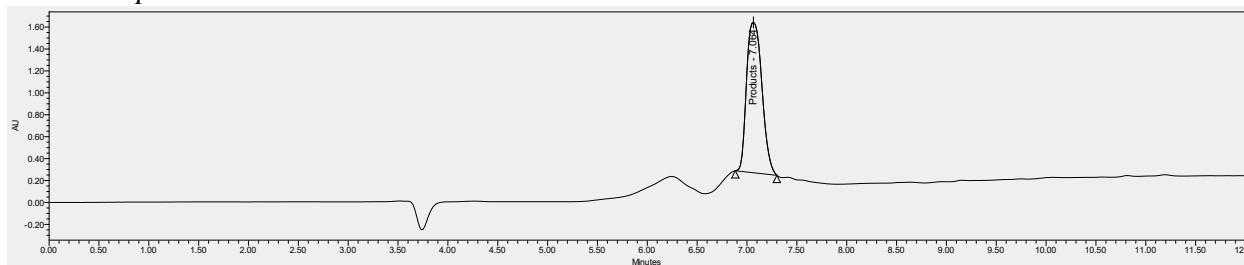

|   | Name     | Retention Time | Area     | % Area |
|---|----------|----------------|----------|--------|
| 1 | Products | 7.064          | 14688336 | 100.00 |







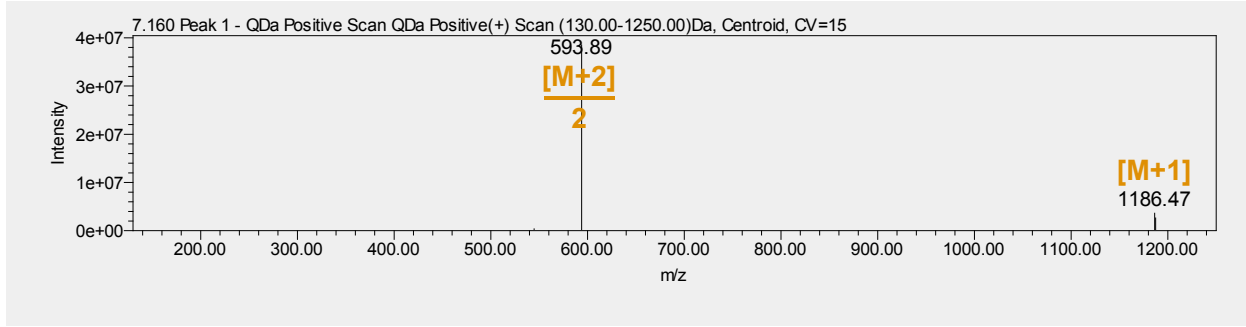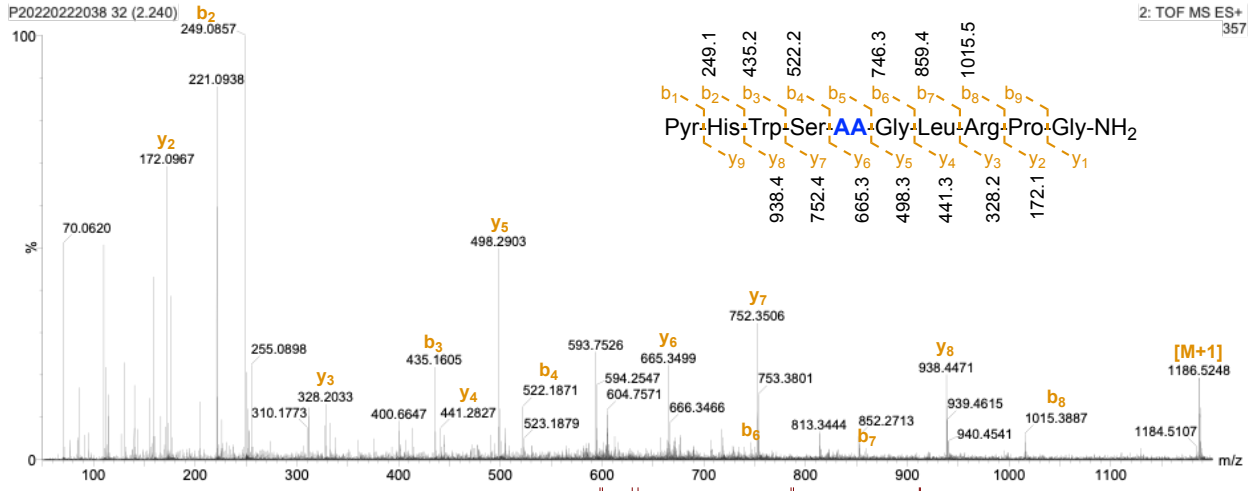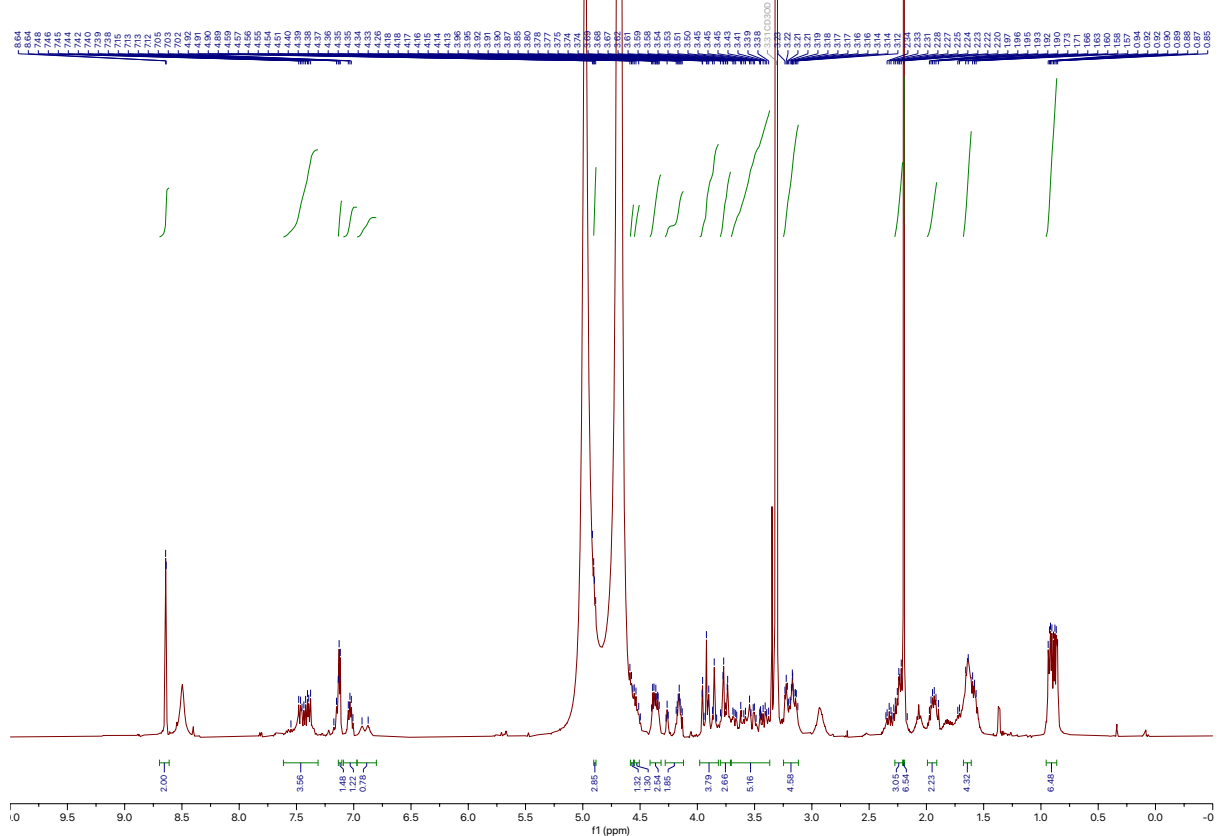

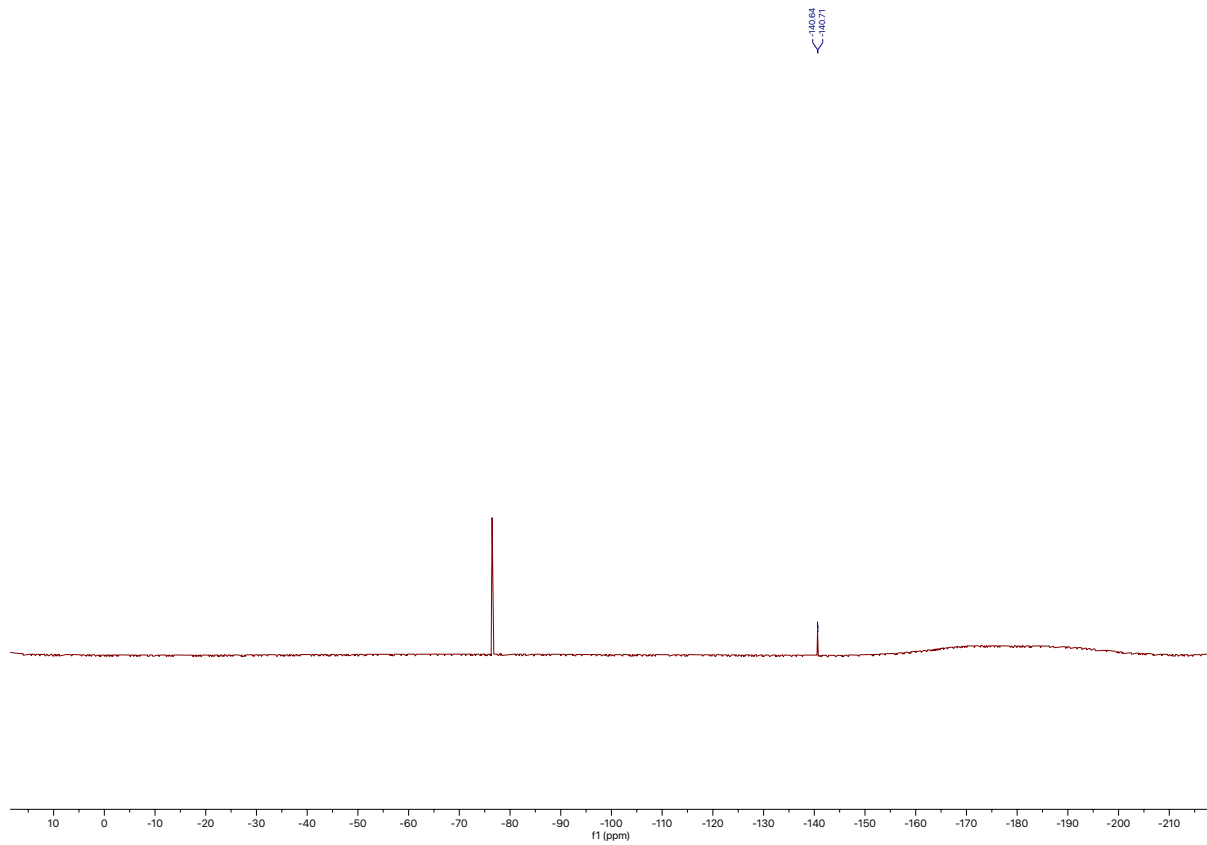

## References

- [1] J. R. Immel, M. Chilamari, S. Bloom, *Chem. Sci.* **2021**, *12*, 10083–10091.
- [2] P. M. Morrison, P. J. Foley, S. L. Warriner, M. E. Webb, *Chem. Commun.* **2015**, *51*, 13470–13473.
